# Supplementary material for: Comparative Genomics, Evolution, and Drought-Induced Expression of Dehydrin Genes in Model Brachypodium Grasses
Source: MDPI journal article supplement (doi:10.3390/plants10122664), 2021-12-03
Supplement: s1 [file s1]

Supplementary Tables

**Supplementary Table S1.** Sampled dehydrin sequences from grass species closely related to *Brachypodium*. The accession code and the protein name correspond to those indicated in Phytozome and Genbank. Asterisks indicate the original names of DHN genes. Outgroup DHN sequences orthologous to the corresponding *Brachypodium* Bdhn genes are based on the analyses developed in this study; crosses indicate orthology information retrieved from Ensembl Plants and Phytozome.

| <i>Panther<br/>family<br/>ontology</i> | <i>Bdhn</i>              | <i>Aegilops tauschii</i> |           | <i>Hordeum vulgare</i> |           | <i>Oryza sativa</i> |            | <i>Sorghum bicolor</i> |             | <i>Triticum aestivum</i> |           | <i>Zea mays</i> |             |
|----------------------------------------|--------------------------|--------------------------|-----------|------------------------|-----------|---------------------|------------|------------------------|-------------|--------------------------|-----------|-----------------|-------------|
|                                        |                          | Accession                | Name      | Accession              | Name      | Accession           | Name       | Accession              | Name        | Accession                | Name      | Accession       | Name        |
| <i>ERD14</i>                           | <i>Bdhn 1<br/>Bdhn 2</i> | AET6Gv20653900           | DHNAtau 1 | HORVU6Hr1G064620       | DHNVul 8* | LOC_Os02g44870      | DHNOsat 1† | Sobic.004G286600       | DHNSbic 2*† | TraesCS6A02G253300       | DHNTaes 1 | GRMZM2G147014   | DHNZmays 1† |
|                                        |                          |                          |           |                        |           |                     |            |                        |             | TraesCS6D02G234700       | DHNTaes 2 | GRMZM2G373522   | DHNZmays 2† |
|                                        |                          |                          |           |                        |           |                     |            |                        |             | TraesCS6B02G273400       | DHNTaes 3 |                 |             |
| <i>SF23</i>                            | <i>Bdhn 3</i>            | AET6Gv20864900           | DHNAtau 4 | HORVU6Hr1G084010       | DHNVul 7* | LOC_Os11g26570      | DHNOsat 2† | Sobic.009G116700       | DHNSbic 3†  | TraesCS6D02G332900       | DHNTaes 4 | Zm00001d010094  | DHNZmays 3† |
|                                        |                          | AET6Gv20865700           | DHNAtau5  | HORVU6Hr1G084070       | DHNVul 3* |                     |            | Sobic.010G041900       | DHNSbic 4†  | TraesCS6D02G333200       | DHNTaes 5 |                 |             |
|                                        |                          | AET6Gv20866400           | DHNAtau 6 |                        |           |                     |            |                        |             | TraesCS6D02G333300       | DHNTaes 6 |                 |             |
|                                        |                          | AET6Gv20866000           | DHNAtau 7 |                        |           |                     |            |                        |             | TraesCS6D02G333600       | DHNTaes 7 |                 |             |
|                                        |                          |                          |           |                        |           |                     |            |                        |             | TraesCS6A02G350700       | DHNTaes 8 |                 |             |

|                                                           |                |                |                  |             |                |             |                           |                   |               |             |
|-----------------------------------------------------------|----------------|----------------|------------------|-------------|----------------|-------------|---------------------------|-------------------|---------------|-------------|
|                                                           |                |                |                  |             |                |             | TraesCS6B02G383500        | DHNTaes 9         |               |             |
|                                                           |                |                |                  |             |                |             | TraesCS6B02G383600        | DHNTaes 10        |               |             |
|                                                           |                |                |                  |             |                |             | TraesCS6D02G333100        | DHNTaes 11        |               |             |
|                                                           |                |                |                  |             |                |             | TraesCS6A02G350600        | DHNTaes 12        |               |             |
|                                                           |                |                |                  |             |                |             | TraesCS6A02G350800        | DHNTaes 13        |               |             |
|                                                           |                |                |                  |             |                |             |                           |                   |               |             |
| <i>Bdhn 4</i><br><i>Bdhn 5</i>                            | AET5Gv20866800 | DHNAtau 2*     | HORVU5Hr1G092120 | DHNHvul1a*  | LOC_Os11g26780 | DHNOsat 3a† |                           |                   |               |             |
|                                                           | AET5Gv20866700 | DHNAtau 9      | HORVU5Hr1G092160 | DHNHvul 1b  | LOC_Os11g26790 | DHNOsat 3b† |                           |                   |               |             |
|                                                           |                |                | HORVU5Hr1G092100 | DHNHvul 2a* |                |             |                           |                   |               |             |
|                                                           |                |                | HORVU5Hr1G092150 | DHNHvul 2b  |                |             |                           |                   |               |             |
|                                                           |                |                |                  |             |                |             |                           |                   |               |             |
| <i>SF14</i><br><br><br><br><i>Bdhn 7</i><br><i>Bdhn 8</i> |                |                |                  |             |                |             | TraesCS5A02G424700        | DHNTaes 14        |               |             |
|                                                           |                |                |                  |             |                |             | TraesCS5A02G424800        | DHNTaes 15        |               |             |
|                                                           |                |                |                  |             |                |             | TraesCS5B02G426700        | DHNTaes 16        |               |             |
|                                                           |                |                |                  |             |                |             | TraesCS5B02G426800        | DHNTaes 17        |               |             |
|                                                           |                |                |                  |             |                |             | TraesCS5D02G433200        | DHNTaes 18        |               |             |
|                                                           |                |                |                  |             |                |             | <i>TraesCS5D02G433300</i> | <i>DHNTaes 19</i> |               |             |
|                                                           |                |                |                  |             |                |             |                           |                   |               |             |
| <i>SF19</i>                                               | <i>Bdhn 6</i>  | AET4Gv20132600 | DHNAtau 3*       |             |                |             |                           |                   | GRMZM2G052364 | DHNZmays 4† |

|               |                |                |           |          |             |                |            |                  |            |               |              |
|---------------|----------------|----------------|-----------|----------|-------------|----------------|------------|------------------|------------|---------------|--------------|
|               |                |                |           |          |             |                |            |                  |            | GRMZM2G098750 | DHNZmays 5†  |
| <i>XEROI</i>  | <i>Bdhn 9</i>  | AET3Gv20620600 | DHNAtau 8 |          |             | LOC_Os01g50700 | DHNOsat 4  | Sobic.003G270200 | DHNSbic 5  |               |              |
| <i>HIRD11</i> | <i>Bdhn 10</i> |                |           | AY681974 | DHNHvul 13* | LOC_Os03g45280 | DHNOsat 13 | Sobic.001G149500 | DHNSbic 10 | GRMZM2G169372 | DHNZmays 10a |
|               |                |                |           |          |             |                |            |                  |            | GRMZM2G448511 | DHNZmays 10b |

**Supplementary Table S2.** Molecular traits of *Brachypodium Bdhn* proteins. No. aa, number of aminoacids; Mwt, molecular weight; pI, isoelectric point; Instability index; GRAVY, grand hydrophathicity average index. Abbreviations of species and reference genomes: BD, *B. distachyon* Bd21; BHD, *B. hybridum* D-subgenome ABR113; BS, *B. stacei* ABR114; BHS, *B. hybridum* S-subgenome ABR113; BSY, *B. sylvaticum* Ain1.

| <i>Bdhn</i>   | No. aa |     |     |     |     | Mwt (Kda) |         |         |         |         | pI   |      |      |      |      | Instability index |       |       |       |       | GRAVY |       |       |       |       |
|---------------|--------|-----|-----|-----|-----|-----------|---------|---------|---------|---------|------|------|------|------|------|-------------------|-------|-------|-------|-------|-------|-------|-------|-------|-------|
|               | BD     | BHD | BS  | BHS | BSY | BD        | BHD     | BS      | BHS     | BSY     | BD   | BHD  | BS   | BHS  | BSY  | BD                | BHD   | BS    | BHS   | BSY   | BD    | BHD   | BS    | BHS   | BSY   |
| <i>Bdhn1a</i> | 252    | 252 | 259 | 259 | 252 | 27506.5   | 27575.6 | 28096.2 | 28096.2 | 27255.3 | 5.24 | 5.30 | 5.54 | 5.54 | 5.30 | 58.09             | 60.80 | 58.20 | 58.20 | 61.23 | -1.17 | -1.18 | -1.16 | -1.16 | -1.09 |
| <i>Bdhn1b</i> |        |     |     |     | 252 |           |         |         |         | 27354.4 |      |      |      |      | 5.42 |                   |       |       |       | 55.47 |       |       |       |       | -1.11 |
| <i>Bdhn2</i>  | 254    | 254 | 252 | 252 | 258 | 27504.6   | 27490.6 | 27304.4 | 27352.5 | 28032.2 | 5.24 | 5.24 | 5.30 | 5.30 | 5.37 | 64.07             | 63.54 | 65.46 | 64.41 | 61.02 | -1.04 | -1.04 | -1.10 | -1.12 | -1.13 |
| <i>Bdhn3</i>  | 163    | 163 | 160 | 160 | 162 | 16348.6   | 16348.6 | 16153.4 | 15978.2 | 16107.3 | 9.13 | 9.13 | 7.17 | 6.79 | 8.87 | 15.43             | 15.43 | 17.31 | 18.55 | 14.94 | -1.07 | -1.07 | -1.03 | -1.00 | -1.03 |
| <i>Bdhn4</i>  | 107    |     |     |     |     | 11015.2   |         |         |         |         | 9.40 |      |      |      |      | 47.63             |       |       |       |       | -1.24 |       |       |       |       |
| <i>Bdhn5</i>  | 143    | 143 | 132 | 132 | 145 | 14468.8   | 14469.8 | 13518.8 | 13504.8 | 14730.0 | 8.86 | 8.86 | 9.16 | 9.16 | 8.07 | 28.95             | 28.95 | 30.08 | 29.44 | 32.68 | -1.05 | -1.05 | -1.08 | -1.08 | -1.06 |
| <i>Bdhn6</i>  | 395    | 395 | 362 | 363 | 423 | 37817.7   | 37751.5 | 34828.3 | 35013.6 | 40262.1 | 9.03 | 9.05 | 8.53 | 8.55 | 8.06 | 8.01              | 7.75  | 12.31 | 9.67  | 7.23  | -0.67 | -0.69 | -0.76 | -0.76 | -0.67 |
| <i>Bdhn7</i>  | 183    | 183 | 181 | 181 | 180 | 18455.9   | 18429.9 | 18340.8 | 18340.8 | 18203.7 | 9.25 | 9.25 | 9.05 | 9.05 | 9.25 | 18.26             | 17.79 | 21.10 | 21.10 | 16.35 | -1.10 | -1.08 | -1.14 | -1.14 | -1.03 |
| <i>Bdhn8</i>  | 157    | 157 | 169 | 169 | 172 | 16125.5   | 16125.5 | 17248.6 | 17226.6 | 17528.0 | 9.07 | 9.07 | 9.05 | 9.05 | 9.33 | 21.05             | 21.05 | 22.31 | 22.76 | 29.13 | -1.15 | -1.15 | -1.12 | -1.12 | -1.12 |
| <i>Bdhn9</i>  | 226    | 226 | 206 | 206 | 222 | 23501.6   | 23532.6 | 21570.5 | 21570.5 | 22965.1 | 5.79 | 5.68 | 5.99 | 5.99 | 6.06 | 43.84             | 41.28 | 42.75 | 42.75 | 41.40 | -0.80 | -0.83 | -0.94 | -0.94 | -0.83 |
| <i>Bdhn10</i> | 100    | 102 | 107 | 107 | 102 | 11313.5   | 11515.6 | 12109.3 | 12109.3 | 11529.7 | 7.23 | 6.87 | 7.25 | 7.25 | 6.87 | 41.87             | 43.14 | 42.39 | 42.39 | 43.14 | -2.15 | -2.15 | -2.19 | -2.19 | -2.15 |

**Supplementary Table S3.** Chromosomal location of *Bdhn* genes across the four studied *Brachypodium* species and genomes. Chr, chromosome number (*B. distachyon* Bd21: Bd1-Bd5; *B. hybridum* ABR113 subgenome D: Bd1-Bd5; *B. stacei* ABR114: Bs1-Bs10; *B. hybridum* ABR113 subgenome S: Bs1-Bs10; *B. sylvaticum* Ain-1: Bsy1-Bsy9). The highest density of dehydrin genes were found in the syntenic chromosomes Bd3 and Bd4 (*Bdhn2*, *Bdhn4*, *Bdhn5*, *Bdhn6*, *Bdhn7*, *Bdhn8*), Bs4 (*Bdhn2*, *Bdhn6*, *Bdhn7*), the equivalent *B. hybridum* D and S subgenomic chromosomes (except *Bdhn4*), and Bsy4 (*Bdhn2*, *Bdhn6*, *Bdhn7*, *Bdhn8*). Lengths and positions correspond to the respective reference genomes.

|                      |                  | <i>Bdhn1a</i> | <i>Bdhn1b</i> | <i>Bdhn2</i> | <i>Bdhn3</i> | <i>Bdhn4</i> | <i>Bdhn5</i> | <i>Bdhn6</i> | <i>Bdhn7</i> | <i>Bdhn8</i> | <i>Bdhn9</i> | <i>Bdhn10</i> |
|----------------------|------------------|---------------|---------------|--------------|--------------|--------------|--------------|--------------|--------------|--------------|--------------|---------------|
| <i>B. distachyon</i> | <b>Chr</b>       | Bd5           |               | Bd3          | Bd1          | Bd 4         | Bd 4         | Bd 4         | Bd 3         | Bd 3         | Bd 2         | Bd 1          |
| Bd21                 | <b>Length</b>    | 28630136      |               | 59640145     | 75071545     | 48594894     | 48594894     | 48594894     | 59640145     | 59640145     | 59130575     | 75071545      |
|                      | <b>from</b>      | 14358126      |               | 52061272     | 33400971     | 26400080     | 26401854     | 22188216     | 45300502     | 45290875     | 47751383     | 10098645      |
|                      | <b>to</b>        | 14359531      |               | 52062769     | 33402000     | 26400807     | 26402677     | 22189942     | 45301669     | 45291925     | 47757368     | 10100931      |
|                      | <b>direction</b> | forward       |               | forward      | reverse      | reverse      | reverse      | forward      | reverse      | forward      | forward      | reverse       |
| <i>B. hybridum</i> D | <b>Chr</b>       | Bd5           |               | Bd3          | Bd1          |              | Bd 4         | Bd 4         | Bd3          | Bd3          | Bd 2         | Bd 1          |
| ABR113               | <b>Length</b>    | 28673805      |               | 59422649     | 73190849     |              | 48381198     | 48381198     | 59422649     | 59422649     | 59597844     | 73190849      |
|                      | <b>from</b>      | 14493652      |               | 51909664     | 32658384     |              | 25616401     | 21335117     | 45017036     | 45007503     | 47969138     | 9743153       |
|                      | <b>to</b>        | 14494867      |               | 51910828     | 32659379     |              | 25617226     | 21336708     | 45018083     | 45008367     | 47975373     | 9743841       |
|                      | <b>direction</b> | forward       |               | forward      | reverse      |              | reverse      | forward      | reverse      | forward      | forward      | reverse       |
| <i>B. stacei</i>     | <b>Chr</b>       | Bs9           |               | Bs4          | Bs7          |              | Bs5          | Bs5          | Bs4          | Bs4          | Bs1          | Bs2           |
| ABR114               | <b>Length</b>    | 20576529      |               | 24645555     | 20893312     |              | 23048618     | 23048618     | 24645555     | 24645555     | 30086066     | 27792411      |
|                      | <b>from</b>      | 9210852       |               | 6997868      | 14026099     |              | 3806913      | 6372578      | 13156720     | 13537514     | 10860306     | 18652003      |
|                      | <b>to</b>        | 9212190       |               | 6999029      | 14026708     |              | 3849990      | 6374159      | 13157693     | 13538422     | 10866472     | 18652813      |
|                      | <b>direction</b> | forward       |               | reverse      | forward      |              | forward      | reverse      | forward      | forward      | reverse      | forward       |
| <i>B. hybridum</i> S | <b>Chr</b>       | Bs9           |               | Bs4          | Bs7          |              | Bs5          | Bs5          | Bs4          | Bs4          | Bs1          | Bs2           |
| ABR113               | <b>Length</b>    | 21007308      |               | 25447193     | 21638549     |              | 23591727     | 23591727     | 25447193     | 25447193     | 30608744     | 28346489      |
|                      | <b>from</b>      | 7214663       |               | 7269373      | 14706419     |              | 3849103      | 7640493      | 13819476     | 13842937     | 10890765     | 19034663      |

|                      |                  |          |          |          |          |  |          |          |          |          |          |          |
|----------------------|------------------|----------|----------|----------|----------|--|----------|----------|----------|----------|----------|----------|
|                      | <b>to</b>        | 7216004  |          | 7270541  | 14707427 |  | 3849990  | 7642071  | 13820451 | 13843854 | 10897704 | 19035490 |
|                      | <b>direction</b> | forward  |          | reverse  | forward  |  | forward  | forward  | forward  | reverse  | reverse  | forward  |
| <i>B. sylvaticum</i> | <b>Chr</b>       | Bsy9     | Bsy9     | Bsy4     | Bsy7     |  | Bsy5     | Bsy4     | Bsy4     | Bsy4     | Bsy1     | Bsy2     |
| Ain-1                | <b>Lenght</b>    | 31923712 | 31923712 | 38747968 | 22318590 |  | 48035605 | 38747968 | 38747968 | 38747968 | 52666873 | 42817455 |
|                      | <b>from</b>      | 13763612 | 14190187 | 9798501  | 14062257 |  | 26543391 | 21623366 | 19478535 | 19507464 | 17853540 | 25255158 |
|                      | <b>to</b>        | 13765006 | 14191050 | 9799643  | 14062972 |  | 26543956 | 21625489 | 19479154 | 19508169 | 17853540 | 25256158 |
|                      | <b>direction</b> | forward  | reverse  | reverse  | forward  |  | reverse  | forward  | forward  | reverse  | reverse  | forward  |

**Supplementary Table S4.** Sampling origins of the four studied *Brachypodium* species and of 54 ecotypes of *B. distachyon*. All samples were used in the comparative genomic analysis of the dehydrin genes. Asterisks indicate *B. distachyon* accessions additionally used in the dehydrin expression and drought-response phenotypic traits changes analyses (32 ecotypes). Diamonds indicate accessions additionally used in the phylogenetic signal analysis (30 ecotypes).

| Species             | accession | longitude | latitude  | Locality                                   |
|---------------------|-----------|-----------|-----------|--------------------------------------------|
| <i>B.stacei</i>     | ABR114    | 38.682846 | 1.398957  | Spain: Balearic isles, Formentera, Torrent |
| <i>B.hybridum</i>   | ABR113    | 38.782993 | -9.250488 | Portugal: Lisboa, Belas                    |
| <i>B.sylvaticum</i> | Ain1      | 36.768235 | 8.707878  | Tunisia: Ain-Draham                        |
| <i>B.distachyon</i> | ABR2*♦    | 3,3000    | 43,6500   | France: Herault, Octon                     |
| <i>B.distachyon</i> | ABR3*♦    | 0,0731    | 42,1805   | Spain: Huesca, Aisa                        |
| <i>B.distachyon</i> | ABR4*♦    | 0,7168    | 42,2627   | Spain: Huesca, Aren                        |
| <i>B.distachyon</i> | ABR5*♦    | -0,5800   | 42,5810   | Spain: Huesca, Jaca, Banaguas              |
| <i>B.distachyon</i> | ABR6*♦    | -2,2030   | 42,5810   | Spain: Navarra, Los Arcos                  |
| <i>B.distachyon</i> | ABR8*♦    | 11,3197   | 43,3146   | Italy: Siena                               |
| <i>B.distachyon</i> | ABR9      | 14,4895   | 46,0609   | Croatia: Ljubjana                          |
| <i>B.distachyon</i> | Adi10*♦   | 38,3523   | 38,7707   | Turkey: Adiyaman                           |
| <i>B.distachyon</i> | Adi12*♦   | 38,3523   | 38,7707   | Turkey: Adiyaman                           |
| <i>B.distachyon</i> | Adi2*♦    | 38,3523   | 38,7707   | Turkey: Adiyaman                           |
| <i>B.distachyon</i> | Arn1      | 0,7299    | 42,2565   | Spain: Huesca, Arén                        |
| <i>B.distachyon</i> | Bd1_1*♦   | 28,2510   | 38,4170   | Turkey: Manisa                             |
| <i>B.distachyon</i> | Bd18_1*♦  | 33,7300   | 39,3678   | Turkey: Kaman                              |
| <i>B.distachyon</i> | Bd2_3*♦   | 44,4031   | 33,7609   | Irak: Al Mansuriya                         |
| <i>B.distachyon</i> | Bd21_3*♦  | 44,5350   | 36,7660   | Irak: near Salakudin                       |
| <i>B.distachyon</i> | Bd29_1    | 33,5639   | 44,5153   | Ukraine: Krimea                            |
| <i>B.distachyon</i> | Bd3_1*♦   | 44,5350   | 36,7660   | Irak: Al Mansuriya                         |
| <i>B.distachyon</i> | BdTR10C*♦ | 31,8849   | 37,7782   | Turkey: Konya Province                     |
| <i>B.distachyon</i> | BdTR11A   | 31,8849   | 37,7782   | Turkey: Konya Province                     |
| <i>B.distachyon</i> | BdTR11G*♦ | 27,4770   | 41,4220   | Turkey: Kirklareli                         |
| <i>B.distachyon</i> | BdTR11I*♦ | 28,0402   | 39,7382   | Turkey: Balikesir, Karakaya                |
| <i>B.distachyon</i> | BdTR12C*  | 34,6503   | 39,7482   | Turkey: Saray, Yozgat province             |
| <i>B.distachyon</i> | BdTR13a*♦ | 32,4324   | 39,7565   | Turkey: Ankara                             |
| <i>B.distachyon</i> | BdTR13C*  | 32,9881   | 39,4129   | Turkey: Ankara                             |
| <i>B.distachyon</i> | BdTR1i*♦  | 28,5830   | 38,0930   | Turkey: Aydin                              |
| <i>B.distachyon</i> | BdTR2B*♦  | 31,3311   | 40,0821   | Turkey: Karahisarkozlu                     |
| <i>B.distachyon</i> | BdTR2G*♦  | 32,9850   | 40,3940   | Turkey: Ankara                             |
| <i>B.distachyon</i> | BdTR3C*♦  | 32,9630   | 36,7830   | Turkey: Balkusan                           |
| <i>B.distachyon</i> | BdTR5i*♦  | 32,9854   | 40,3936   | Turkey: Cubuk                              |
| <i>B.distachyon</i> | BdTR7A    | 34,6500   | 39,7480   | Turkey: Yozgat                             |

|                     |          |         |         |                                            |
|---------------------|----------|---------|---------|--------------------------------------------|
| <i>B.distachyon</i> | BdTR8i   | 34,0714 | 37,1885 | Turkey: Berendi                            |
| <i>B.distachyon</i> | BdTR9K*♦ | 30,7886 | 39,7530 | Turkey: Eskisehir                          |
| <i>B.distachyon</i> | Bis1*♦   | 41,0151 | 37,8735 | Turkey: Bismil                             |
| <i>B.distachyon</i> | Foz1     | -1,3050 | 42,6370 | Spain: Navarra, Foz de Lumbier             |
| <i>B.distachyon</i> | Gaz8     | 37,3910 | 37,1280 | Turkey: Gaziantep                          |
| <i>B.distachyon</i> | Jer1     | 0,0120  | 42,0550 | Spain: Huesca, Adahuesca                   |
| <i>B.distachyon</i> | Kah1*♦   | 38,5330 | 37,7340 | Turkey: Kahta                              |
| <i>B.distachyon</i> | Kah5*♦   | 38,5330 | 37,7340 | Turkey: Kahta                              |
| <i>B.distachyon</i> | Koz1*♦   | 41,6100 | 38,1520 | Turkey: Kozluk                             |
| <i>B.distachyon</i> | Koz3*♦   | 41,6100 | 38,1520 | Turkey: Kozluk                             |
| <i>B.distachyon</i> | Luc1     | -0,8930 | 42,6100 | Spain: Huesca, Berdun                      |
| <i>B.distachyon</i> | Mig3     | -0,2050 | 42,1470 | Spain: Huesca, Ibieca, San Miguel de Foces |
| <i>B.distachyon</i> | Mon3     | -0,2090 | 41,6520 | Spain: Zaragoza, Castejón de Monegros      |
| <i>B.distachyon</i> | Mur1     | 0,8770  | 42,0980 | Spain: Lleida, Castillo de Mur             |
| <i>B.distachyon</i> | Per1     | -1,7500 | 42,7370 | Spain: Navarra, Puerto del Perdon          |
| <i>B.distachyon</i> | S8iiC    | 0,1440  | 41,6054 | Spain: Huesca, Zaidín                      |
| <i>B.distachyon</i> | Sig2     | -1,0150 | 42,6130 | Spain: Zaragoza, Sigüés                    |
| <i>B.distachyon</i> | Tek2     | 26,9310 | 41,0850 | Turkey: Tekirdag                           |
| <i>B.distachyon</i> | Tek4     | 27,5191 | 41,0112 | Turkey: Tekirdag                           |



**Supplementary Table S5.** Topological congruence tests between **(a)** the *B. distachyon* nuclear species tree (Gordon et al. 2017) and **(b)** the *B. distachyon* plastome tree (Sancho et al. 2018) *versus* the *B. distachyon* dehydrin *Bdhn* tree. Test(s) were performed for significance of likelihood-score differences. KH: Kishino-Hasegawa test using normal approximation, two-tailed test. SH: Shimodaira-Hasegawa test using RELL bootstrap (one-tailed test). AU: Shimodaira Approximately Unbiased test. Values for KH/SH/AU tests are P values for the null hypothesis of no difference between trees. \*the null hypothesis is accepted. Number of bootstrap replicates = 1,000,000.

| KH test                               |            |            |         |        |          | SH      |         |     |
|---------------------------------------|------------|------------|---------|--------|----------|---------|---------|-----|
| a)                                    | -lnL       | Diff'-lnL  | s.d.    | T      | P        | SH-test | wtd-SH  | AU  |
| Tree1= Brachy nuclear tree (best)     | 46255.5731 | (best)     |         |        |          |         |         |     |
| Tree2= Brachy <i>Bdhn</i> tree        | 54391.9775 | 8136.40442 | 202.241 | 40.231 | <0.0001* | 0.0000* | 0.0000* | ~0* |
| Tree1=Brachy <i>Bdhn</i> tree (best)  | 5898.89581 | (best)     |         |        |          |         |         |     |
| Tree2=Brachy nuclear tree             | 6170.77777 | 271.88196  | 59.738  | 4.551  | <0.0001* | 0.0000* | 0.0000* | ~0* |
| * P < 0.05                            |            |            |         |        |          |         |         |     |
| (b)                                   |            |            |         |        |          |         |         |     |
| Tree1= Brachy plastome tree (best)    | 1442.4868  | (best)     |         |        |          |         |         |     |
| Tree2= Brachy <i>Bdhn</i> tree        | 2334.75366 | 892.26686  | 52.856  | 16.881 | <0.0001* | 0.0000* | 0.0000* | ~0* |
| Tree1= Brachy <i>Bdhn</i> tree (best) | 5898.89581 | (best)     |         |        |          |         |         |     |
| Tree2= Brachy plastome tree           | 6268.97012 | 370.07431  | 91.549  | 4.042  | 0.0001*  | 0.0003* | 0.0003* | ~0* |
| * P < 0.05                            |            |            |         |        |          |         |         |     |

**Supplementary Table S6.** *Brachypodium distachyon* climate data. **(a)** Values of 19 current climate parameters retrieved from worldclim for the sampled localities of the studied *B. distachyon* ecotypes. Climate, climatic class of the *B. distachyon* ecotypes classified according to their PCA1 values (cold:> 2.5; mesic: (-2.5) – (2.5); warm: < -2.5; see Supplementary Figure S5). **(b)** PCA1 and PCA2, coordinate values of the first and second PCA axes obtained from the climate PC analysis.

**(a)**

| ecotype  | longitude | latitude  | altitude | bio1 | bio2 | bio3 | bio4  | bio5 | bio6 | bio7 | bio8 | bio9 | bio10 | bio11 | bio12 | bio13 | bio14 | bio15 | bio16 | bio17 | bio18 | bio19 | PCA1    | Climate |
|----------|-----------|-----------|----------|------|------|------|-------|------|------|------|------|------|-------|-------|-------|-------|-------|-------|-------|-------|-------|-------|---------|---------|
| ABR2     | 3.3       | 43.65     | 265      | 13.3 | 10   | 3.7  | 577.4 | 27.9 | 1.3  | 26.6 | 9.9  | 20.8 | 20.8  | 6     | 707   | 85    | 29    | 23    | 218   | 126   | 126   | 188   | 2.5793  | Cold    |
| ABR3     | 0.07311   | 42.1805   | 798      | 10.1 | 10   | 3.8  | 566.4 | 24.6 | -1.5 | 26.1 | 12.1 | 3    | 17.5  | 3     | 688   | 79    | 40    | 18    | 206   | 143   | 162   | 143   | 4.8611  | Cold    |
| ABR4     | 0.7168    | 42.26265  | 932      | 9.9  | 9.5  | 3.6  | 582.3 | 24.2 | -1.6 | 25.8 | 11.8 | 2.6  | 17.4  | 2.6   | 873   | 96    | 53    | 18    | 262   | 176   | 227   | 176   | 5.6901  | Cold    |
| ABR5     | -0.58     | 42.581    | 986      | 8.7  | 9.8  | 3.9  | 540.9 | 22.6 | -2.4 | 25   | 10.5 | 15.8 | 15.8  | 2     | 842   | 90    | 48    | 15    | 237   | 177   | 184   | 208   | 5.3953  | Cold    |
| ABR6     | -2.203    | 42.581    | 557      | 12.1 | 10.1 | 3.9  | 557.9 | 26.6 | 0.9  | 25.7 | 8.8  | 19.3 | 19.3  | 5.1   | 668   | 71    | 36    | 18    | 191   | 131   | 131   | 174   | 3.4004  | Cold    |
| ABR8     | 11.319695 | 43.314569 | 300      | 13.7 | 9    | 3.4  | 600.3 | 28.7 | 2.5  | 26.2 | 10.5 | 21.6 | 21.6  | 6.4   | 757   | 101   | 29    | 29    | 262   | 117   | 117   | 203   | 2.1759  | Mesic   |
| Adi10    | 38.352277 | 38.770694 | 839      | 13.6 | 9.8  | 2.7  | 936.7 | 33.4 | -2.8 | 36.2 | 12.2 | 25.3 | 25.3  | 1.3   | 459   | 63    | 2     | 57    | 172   | 13    | 25    | 161   | -1.7567 | Mesic   |
| Adi12    | 38.352277 | 38.770694 | 839      | 13.6 | 9.8  | 2.7  | 936.7 | 33.4 | -2.8 | 36.2 | 12.2 | 25.3 | 25.3  | 1.3   | 459   | 63    | 2     | 57    | 172   | 13    | 25    | 161   | -1.7567 | Mesic   |
| Adi2     | 38.352277 | 38.770694 | 839      | 13.6 | 9.8  | 2.7  | 936.7 | 33.4 | -2.8 | 36.2 | 12.2 | 25.3 | 25.3  | 1.3   | 459   | 63    | 2     | 57    | 172   | 13    | 25    | 161   | -1.7567 | Mesic   |
| Bd1-1    | 28.251    | 38.417    | 644      | 13.8 | 11.5 | 3.8  | 660.1 | 30.2 | 0.7  | 29.5 | 5.6  | 22   | 22.4  | 5.6   | 698   | 146   | 8     | 72    | 360   | 38    | 39    | 360   | -0.5973 | Mesic   |
| Bd18-1   | 33.730025 | 39.36784  | 1057     | 10.4 | 10.9 | 3.4  | 747.4 | 27.4 | -4.3 | 31.7 | 0.4  | 19.4 | 19.6  | 0.4   | 445   | 63    | 6     | 48    | 161   | 29    | 49    | 161   | 0.7309  | Mesic   |
| Bd2-3    | 44.403075 | 33.760883 | 40       | 22.7 | 15.2 | 3.8  | 877.5 | 43.7 | 4.5  | 39.2 | 12.7 | 33.7 | 33.7  | 11.3  | 171   | 31    | 0     | 86    | 88    | 0     | 0     | 87    | -5.7177 | Warm    |
| Bd21ctrl | 44.535    | 36.766    | 1089     | 15   | 12.1 | 3.1  | 961.1 | 36   | -2.8 | 38.8 | 3.6  | 27   | 27    | 2.6   | 728   | 136   | 0     | 86    | 385   | 3     | 3     | 349   | -3.5166 | Warm    |
| Bd21-3   | 44.535    | 36.766    | 1089     | 15   | 12.1 | 3.1  | 961.1 | 36   | -2.8 | 38.8 | 3.6  | 27   | 27    | 2.6   | 728   | 136   | 0     | 86    | 385   | 3     | 3     | 349   | -3.5166 | Warm    |
| Bd3-1    | 44.535    | 36.766    | 1089     | 15   | 12.1 | 3.1  | 961.1 | 36   | -2.8 | 38.8 | 3.6  | 27   | 27    | 2.6   | 728   | 136   | 0     | 86    | 385   | 3     | 3     | 349   | -3.5166 | Warm    |
| Bd30-1   | -3.558733 | 36.990489 | 810      | 14.7 | 11.4 | 3.8  | 603.2 | 31.7 | 2.2  | 29.5 | 8.4  | 22.9 | 22.9  | 7.5   | 467   | 63    | 5     | 54    | 181   | 24    | 24    | 175   | -0.4576 | Mesic   |
| BdTR10c  | 31.884911 | 37.778233 | 1448     | 9.4  | 11.5 | 3.5  | 750   | 27.2 | -5.6 | 32.8 | -0.3 | 18.6 | 18.9  | -0.3  | 522   | 77    | 10    | 49    | 209   | 36    | 52    | 209   | 0.8878  | Mesic   |
| BdTR11g  | 27.477    | 41.422    | 89       | 13   | 11.3 | 3.7  | 666.2 | 29.5 | -0.3 | 29.8 | 6.2  | 20.9 | 21.5  | 4.5   | 598   | 78    | 18    | 37    | 227   | 74    | 86    | 202   | 1.0333  | Mesic   |
| BdTR11i  | 28.040197 | 39.738164 | 229      | 13.7 | 10.9 | 3.7  | 683.7 | 29.8 | 0.5  | 29.3 | 7    | 21.9 | 22.4  | 5     | 652   | 108   | 11    | 56    | 284   | 48    | 49    | 282   | 0.0435  | Mesic   |
| BdTR1i   | 28.583    | 38.093    | 956      | 12.6 | 11.5 | 3.7  | 697.5 | 29.7 | -0.9 | 30.6 | 3.9  | 21.3 | 21.6  | 3.9   | 748   | 146   | 10    | 68    | 376   | 43    | 49    | 376   | -0.2852 | Mesic   |
| BdTR2b   | 31.331114 | 40.082097 | 894      | 10.9 | 10.5 | 3.4  | 714.2 | 27.4 | -2.9 | 30.3 | 1.5  | 19.6 | 19.8  | 1.5   | 488   | 61    | 17    | 34    | 159   | 60    | 85    | 159   | 1.5604  | Mesic   |
| BdTR2g   | 32.985    | 40.394    | 1531     | 7.3  | 10.5 | 3.3  | 722   | 23.9 | -7.1 | 31   | -2.4 | 16   | 16.2  | -2.4  | 623   | 84    | 20    | 42    | 221   | 67    | 97    | 221   | 2.6038  | Cold    |
| BdTR5i   | 32.985367 | 40.393647 | 1531     | 7.3  | 10.5 | 3.3  | 722   | 23.9 | -7.1 | 31   | -2.4 | 16   | 16.2  | -2.4  | 623   | 84    | 20    | 42    | 221   | 67    | 97    | 221   | 2.6038  | Cold    |
| BdTR9k   | 30.788631 | 39.75295  | 900      | 10.7 | 11   | 3.5  | 729.1 | 27.8 | -3.5 | 31.3 | 9.8  | 19.5 | 19.8  | 1.1   | 419   | 52    | 11    | 37    | 136   | 45    | 67    | 134   | 1.1200  | Mesic   |
| Bis1     | 41.015083 | 37.876556 | 608      | 16.5 | 13.1 | 3.3  | 928.6 | 38.9 | -0.6 | 39.5 | 9.7  | 28.3 | 28.3  | 4.5   | 548   | 83    | 1     | 70    | 237   | 6     | 10    | 219   | -3.6626 | Warm    |
| Kah1     | 38.533    | 37.734    | 657      | 16.9 | 11   | 2.9  | 914.8 | 37.3 | 0.6  | 36.7 | 5.3  | 28.6 | 28.6  | 5.3   | 586   | 108   | 1     | 77    | 291   | 7     | 10    | 291   | -3.5423 | Warm    |
| Kah5     | 38.533    | 37.734    | 657      | 16.9 | 11   | 2.9  | 914.8 | 37.3 | 0.6  | 36.7 | 5.3  | 28.6 | 28.6  | 5.3   | 586   | 108   | 1     | 77    | 291   | 7     | 10    | 291   | -3.5423 | Warm    |
| Koz1     | 41.61     | 38.152    | 819      | 15.3 | 12.1 | 3    | 951.9 | 37.2 | -2.1 | 39.3 | 8.3  | 27.4 | 27.4  | 3.1   | 703   | 104   | 1     | 69    | 303   | 10    | 10    | 283   | -3.2693 | Warm    |
| Koz3     | 41.61     | 38.152    | 819      | 15.3 | 12.1 | 3    | 951.9 | 37.2 | -2.1 | 39.3 | 8.3  | 27.4 | 27.4  | 3.1   | 703   | 104   | 1     | 69    | 303   | 10    | 10    | 283   | -3.2693 | Warm    |
| RON2     | -0.963    | 42.781    | 956      | 8.9  | 9.9  | 3.9  | 539.5 | 22.9 | -2.2 | 25.1 | 3.1  | 16   | 16    | 2.2   | 952   | 101   | 52    | 16    | 274   | 190   | 190   | 257   | 5.4782  | Cold    |

(b)

| Variable<br>contribution | PCA1       | PCA2       |
|--------------------------|------------|------------|
| bio1                     | 7.04157791 | 2.8336316  |
| bio2                     | 5.1431788  | 0.23831544 |
| bio3                     | 3.59658313 | 1.20932109 |
| bio4                     | 7.92629573 | 0.71530785 |
| bio5                     | 9.29173338 | 0.57639096 |
| bio6                     | 0.48821208 | 6.97369089 |
| bio7                     | 8.7044993  | 0.30756729 |
| bio8                     | 0.03627953 | 10.374377  |
| bio9                     | 8.12122146 | 0.14333639 |
| bio10                    | 9.05581757 | 0.73901616 |
| bio11                    | 1.08408395 | 6.54349079 |
| bio12                    | 2.28358537 | 11.4483415 |
| bio13                    | 0.23276403 | 18.6365656 |
| bio14                    | 8.64758564 | 0.05494295 |
| bio15                    | 9.03019188 | 1.48194295 |
| bio16                    | 0.49621767 | 18.6220566 |
| bio17                    | 8.61189114 | 0.08756497 |
| bio18                    | 9.14009127 | 0.07915297 |
| bio19                    | 1.06819015 | 18.9349869 |

**Supplementary Table S7.** *Brachypodium distachyon* dehydrin expression data. Filtered and normalized transcripts per million (TPM) values of annotated dehydrins. Only four dehydrin genes (*Bdhn1a*, *Bdhn2*, *Bdhn3*, *Bdhn7*) were expressed in leaves of 31-days grown plants. Plants were subjected to drought (W: watered, D: Drought) and temperature (C: Cold, H: Hot) stress conditions (see text). Code indicates the sampling code used in the RNAseq analysis.

| Drought (D)    |           |               |              |              |              | Watered (W)    |           |               |              |              |              |
|----------------|-----------|---------------|--------------|--------------|--------------|----------------|-----------|---------------|--------------|--------------|--------------|
| Code           | accession | <i>Bdhn1a</i> | <i>Bdhn2</i> | <i>Bdhn3</i> | <i>Bdhn7</i> | Code           | accession | <i>Bdhn1a</i> | <i>Bdhn2</i> | <i>Bdhn3</i> | <i>Bdhn7</i> |
| BA030_HD_ABR2  | ABR2      | 309,6         | 207,4        | 131,8        | 21           | BA053_HW_ABR2  | ABR2      | 199,6         | 27,2         | 5,3          | 1            |
| BA101_HD_ABR2  | ABR2      | 150,4         | 142,4        | 278,7        | 19           | BA085_HW_ABR2  | ABR2      | 143,6         | 67,5         | 39,1         | 3,6          |
| BA366_CD_ABR2  | ABR2      | 181,8         | 183,1        | 227,7        | 26,6         | BA145_HW_ABR2  | ABR2      | 132,7         | 36,5         | 0            | 1,7          |
| BA439_CD_ABR2  | ABR2      | 214,9         | 135,5        | 51,5         | 11           | BA403_CW_ABR2  | ABR2      | 163,6         | 53           | 30,2         | 2,9          |
| BA006_HD_ABR3  | ABR3      | 304,9         | 182,2        | 32,1         | 10,7         | BA447_CW_ABR2  | ABR2      | 120,5         | 52           | 26           | 4,7          |
| BA103_HD_ABR3  | ABR3      | 197,7         | 326          | 738,2        | 75,7         | BA096_HW_ABR3  | ABR3      | 248,9         | 29,4         | 8,5          | 3,8          |
| BA418_CD_ABR3  | ABR3      | 328,3         | 116,6        | 43,9         | 9,4          | BA146_HW_ABR3  | ABR3      | 132,4         | 13,2         | 3,3          | 0            |
| BA465_CD_ABR3  | ABR3      | 224,2         | 51,4         | 65,3         | 22,3         | BA413_CW_ABR3  | ABR3      | 193,5         | 46,6         | 26,9         | 1,8          |
| BA038_HD_ABR4  | ABR4      | 299,5         | 76,8         | 7,3          | 2,4          | BA419_CW_ABR3  | ABR3      | 205,1         | 69,4         | 10,1         | 1,3          |
| BA170_HD_ABR4  | ABR4      | 226,2         | 194,7        | 164,3        | 37,6         | BA040_HW_ABR4  | ABR4      | 109,5         | 27,1         | 1,2          | 0            |
| BA368_CD_ABR4  | ABR4      | 270,3         | 65,9         | 15,7         | 15,7         | BA043_HW_ABR4  | ABR4      | 230,1         | 35,3         | 7,3          | 3,7          |
| BA521_CD_ABR4  | ABR4      | 192,6         | 96,3         | 61,4         | 4,7          | BA477_CW_ABR4  | ABR4      | 594,4         | 80,7         | 5,8          | 2,7          |
| BA024_HD_ABR5  | ABR5      | 335,1         | 298,2        | 62,4         | 17           | BA508_CW_ABR4  | ABR4      | 143,5         | 50,5         | 5,8          | 3,2          |
| BA104_HD_ABR5  | ABR5      | 234,1         | 580,1        | 681,7        | 92,8         | BA161_HW_ABR5  | ABR5      | 143,9         | 33,7         | 7,6          | 2,4          |
| BA454_CD_ABR5  | ABR5      | 188,7         | 55,4         | 140,2        | 45           | BA479_CW_ABR5  | ABR5      | 418           | 55,8         | 3,9          | 0,4          |
| BA522_CD_ABR5  | ABR5      | 217,7         | 279,5        | 46,2         | 21,9         | BA502_CW_ABR5  | ABR5      | 254,8         | 23,3         | 9,4          | 6,1          |
| BA037_HD_ABR6  | ABR6      | 333,5         | 130,4        | 147,8        | 13,5         | BA123_HW_ABR6  | ABR6      | 357,3         | 39,7         | 3,6          | 10,8         |
| BA099_HD_ABR6  | ABR6      | 281,5         | 397,3        | 2175,5       | 102,5        | BA153_HW_ABR6  | ABR6      | 340,4         | 26,1         | 3,9          | 3,9          |
| BA416_CD_ABR6  | ABR6      | 289           | 199,9        | 778,6        | 33,6         | BA437_CW_ABR6  | ABR6      | 258,1         | 26,1         | 4,4          | 2,5          |
| BA523_CD_ABR6  | ABR6      | 256,7         | 90,5         | 300,3        | 16,6         | BA452_CW_ABR6  | ABR6      | 308,2         | 18,1         | 3,1          | 2,6          |
| BA100_HD_ABR8  | ABR8      | 298,2         | 144,7        | 199,2        | 63,3         | BA008_HW_ABR8  | ABR8      | 224,6         | 36,4         | 4,2          | 0            |
| BA143_HD_ABR8  | ABR8      | 379,6         | 336,2        | 262,1        | 112          | BA138_HW_ABR8  | ABR8      | 128,8         | 21,1         | 3,5          | 0            |
| BA415_CD_ABR8  | ABR8      | 502,2         | 312,7        | 177,6        | 84,1         | BA360_CW_ABR8  | ABR8      | 249           | 35,8         | 5,6          | 1,7          |
| BA506_CD_ABR8  | ABR8      | 940,2         | 644,1        | 285,3        | 251,7        | BA517_CW_ABR8  | ABR8      | 292,4         | 23,1         | 3,3          | 2,3          |
| BA049_HD_Adi10 | Adi10     | 440           | 197,7        | 215,9        | 112,4        | BA067_HW_Adi10 | Adi10     | 632,4         | 37,3         | 1,7          | 0,4          |
| BA052_HD_Adi10 | Adi10     | 357,1         | 249,5        | 258,2        | 64,7         | BA105_HW_Adi10 | Adi10     | 415,9         | 49,3         | 8,4          | 3,1          |
| BA478_CD_Adi10 | Adi10     | 820,4         | 1251,9       | 1961,7       | 462          | BA428_CW_Adi10 | Adi10     | 841,2         | 51           | 8,7          | 6,5          |
| BA513_CD_Adi10 | Adi10     | 1020,1        | 2043,2       | 2431,9       | 692,5        | BA520_CW_Adi10 | Adi10     | 341,2         | 20,1         | 8,1          | 2,9          |
| BA036_HD_Adi12 | Adi12     | 558           | 751,2        | 290,8        | 59,5         | BA041_HW_Adi12 | Adi12     | 339           | 81,9         | 4,9          | 2,4          |
| BA140_HD_Adi12 | Adi12     | 377,1         | 260,2        | 133          | 56,5         | BA044_HW_Adi12 | Adi12     | 396,1         | 43,2         | 0            | 0            |
| BA455_CD_Adi12 | Adi12     | 778,7         | 840          | 1104,1       | 330          | BA407_CW_Adi12 | Adi12     | 193,2         | 96           | 30,9         | 13,7         |
| BA525_CD_Adi12 | Adi12     | 240,8         | 515,5        | 466,2        | 113,3        | BA423_CW_Adi12 | Adi12     | 746,4         | 53,9         | 11,2         | 1,7          |

|                  |         |        |        |        |       |                  |         |       |      |      |      |
|------------------|---------|--------|--------|--------|-------|------------------|---------|-------|------|------|------|
| BA050_HD_Adi2    | Adi2    | 458,9  | 161,7  | 37,1   | 11    | BA176_HW_Adi2    | Adi2    | 402,2 | 68   | 5    | 3,8  |
| BA094_HD_Adi2    | Adi2    | 396,1  | 457,9  | 318,7  | 55,9  | BA357_CW_Adi2    | Adi2    | 489,2 | 36,5 | 1,1  | 3,2  |
| BA500_CD_Adi2    | Adi2    | 528,3  | 913,4  | 957    | 123,8 | BA468_CW_Adi2    | Adi2    | 398,6 | 65,7 | 4    | 2    |
| BA509_CD_Adi2    | Adi2    | 456,6  | 405,1  | 463,1  | 64,5  | BA354_CW_Bd1-1   | Bd1-1   | 390,9 | 46,9 | 8,1  | 1,5  |
| BA025_HD_Bd1-1   | Bd1-1   | 475,8  | 282,7  | 88,6   | 27,7  | BA496_CW_Bd1-1   | Bd1-1   | 320   | 17,6 | 14,4 | 4    |
| BA051_HD_Bd1-1   | Bd1-1   | 352,8  | 22     | 3,3    | 2,2   | BA060_HW_Bd18-1  | Bd18-1  | 239,9 | 21,8 | 5    | 0    |
| BA122_HD_Bd1-1   | Bd1-1   | 235,1  | 42,5   | 53,7   | 4,5   | BA063_HW_Bd18-1  | Bd18-1  | 278,7 | 16,2 | 2,8  | 0,9  |
| BA442_CD_Bd1-1   | Bd1-1   | 369,3  | 70,6   | 42     | 14,3  | BA375_CW_Bd18-1  | Bd18-1  | 160,7 | 14,5 | 6,9  | 0,8  |
| BA475_CD_Bd1-1   | Bd1-1   | 582,4  | 352,4  | 578,5  | 79,5  | BA446_CW_Bd18-1  | Bd18-1  | 266,7 | 14,6 | 6,3  | 0    |
| BA093_HD_Bd18-1  | Bd18-1  | 464,3  | 392    | 257,2  | 138,3 | BA069_HW_Bd21    | Bd21    | 324,2 | 24,3 | 1,3  | 0,7  |
| BA453_CD_Bd18-1  | Bd18-1  | 1009,6 | 704,2  | 564    | 207,5 | BA112_HW_Bd21    | Bd21    | 363,1 | 70   | 24   | 5,7  |
| BA056_HD_Bd21    | Bd21    | 292,8  | 125    | 23,5   | 12,3  | BA386_CW_Bd21    | Bd21    | 183,1 | 24,9 | 2,4  | 1    |
| BA163_HD_Bd21    | Bd21    | 249,1  | 129,2  | 28,3   | 45,6  | BA456_CW_Bd21    | Bd21    | 330   | 59,6 | 37,8 | 6    |
| BA459_CD_Bd21    | Bd21    | 440,2  | 148,4  | 65,8   | 36,5  | BA054_HW_Bd21-3  | Bd21-3  | 307,6 | 25,8 | 9,4  | 1,8  |
| BA499_CD_Bd21    | Bd21    | 325,3  | 52,3   | 4,7    | 2,9   | BA171_HW_Bd21-3  | Bd21-3  | 276,1 | 26,2 | 18,8 | 0,7  |
| BA097_HD_Bd21-3  | Bd21-3  | 478,7  | 621,3  | 567    | 243,4 | BA458_CW_Bd21-3  | Bd21-3  | 288,6 | 25,4 | 14,7 | 2    |
| BA111_HD_Bd21-3  | Bd21-3  | 452,8  | 647    | 487,3  | 145,7 | BA086_HW_Bd2-3   | Bd2-3   | 181,2 | 37,4 | 5    | 2,1  |
| BA430_CD_Bd21-3  | Bd21-3  | 966,8  | 1402   | 1464,4 | 692,9 | BA114_HW_Bd2-3   | Bd2-3   | 422,7 | 54,3 | 0    | 0    |
| BA512_CD_Bd21-3  | Bd21-3  | 503,2  | 539,2  | 266,5  | 103,9 | BA487_CW_Bd2-3   | Bd2-3   | 327   | 82,5 | 6,9  | 3    |
| BA023_HD_Bd2-3   | Bd2-3   | 531,4  | 253    | 121,1  | 16,7  | BA492_CW_Bd2-3   | Bd2-3   | 542,5 | 48,5 | 3,8  | 4,9  |
| BA088_HD_Bd2-3   | Bd2-3   | 635,6  | 173,8  | 50,8   | 38,3  | BA005_HW_Bd30-1  | Bd30-1  | 266,2 | 37,1 | 5    | 3    |
| BA353_CD_Bd2-3   | Bd2-3   | 291,6  | 40,1   | 6,9    | 1,9   | BA018_HW_Bd30-1  | Bd30-1  | 244,7 | 20,3 | 2,5  | 0,4  |
| BA494_CD_Bd2-3   | Bd2-3   | 550,1  | 341,3  | 200,5  | 60,2  | BA417_CW_Bd30-1  | Bd30-1  | 504,7 | 32,9 | 8,1  | 2,9  |
| BA079_HD_Bd30-1  | Bd30-1  | 353,5  | 492,1  | 287    | 76,5  | BA474_CW_Bd30-1  | Bd30-1  | 444,6 | 44   | 7,3  | 2,9  |
| BA162_HD_Bd30-1  | Bd30-1  | 198,6  | 406,5  | 439,7  | 73,3  | BA007_HW_Bd3-1   | Bd3-1   | 321,4 | 34,7 | 4,6  | 1,5  |
| BA425_CD_Bd30-1  | Bd30-1  | 1005,9 | 1632,6 | 2616,2 | 685,5 | BA012_HW_Bd3-1   | Bd3-1   | 287,1 | 46,4 | 2,6  | 2,2  |
| BA481_CD_Bd30-1  | Bd30-1  | 396,7  | 515,6  | 283,3  | 55,5  | BA429_CW_Bd3-1   | Bd3-1   | 477,4 | 43   | 20,9 | 0    |
| BA166_HD_Bd3-1   | Bd3-1   | 316,4  | 405,3  | 1017,8 | 55,9  | BA434_CW_Bd3-1   | Bd3-1   | 256,1 | 46,6 | 10   | 7,2  |
| BA398_CD_Bd3-1   | Bd3-1   | 441,6  | 446,3  | 730,1  | 78    | BA119_HW_BdTR10c | BdTR10c | 196,7 | 36,9 | 0    | 0    |
| BA422_CD_Bd3-1   | Bd3-1   | 427,5  | 544,5  | 3386,7 | 854,4 | BA131_HW_BdTR10c | BdTR10c | 232   | 65   | 25,5 | 0    |
| BA121_HD_BdTR10c | BdTR10c | 242,1  | 214,3  | 471,6  | 66,8  | BA384_CW_BdTR10c | BdTR10c | 223   | 29,9 | 1,3  | 0    |
| BA173_HD_BdTR10c | BdTR10c | 380,8  | 122,7  | 284,2  | 82    | BA436_CW_BdTR10c | BdTR10c | 177,4 | 56,1 | 7,1  | 3,5  |
| BA421_CD_BdTR10c | BdTR10c | 603,2  | 483    | 1912,7 | 439,9 | BA021_HW_BdTR11g | BdTR11g | 320,5 | 63   | 6,2  | 1,4  |
| BA440_CD_BdTR10c | BdTR10c | 415,4  | 490,6  | 1028,6 | 187,7 | BA032_HW_BdTR11g | BdTR11g | 547   | 46,8 | 9,1  | 2,9  |
| BA059_HD_BdTR11g | BdTR11g | 452,4  | 370,4  | 615,1  | 63,5  | BA406_CW_BdTR11g | BdTR11g | 373,6 | 78,3 | 51,5 | 22,4 |
| BA090_HD_BdTR11g | BdTR11g | 590,1  | 645,2  | 1214,5 | 215,9 | BA493_CW_BdTR11g | BdTR11g | 314,6 | 49,3 | 3,6  | 2,1  |
| BA397_CD_BdTR11g | BdTR11g | 479,7  | 522,4  | 607    | 65,4  | BA042_HW_BdTR11i | BdTR11i | 274,4 | 30,1 | 2,8  | 2,1  |

|                  |         |        |        |        |       |                  |         |       |       |       |      |
|------------------|---------|--------|--------|--------|-------|------------------|---------|-------|-------|-------|------|
| BA510_CD_BdTR11g | BdTR11g | 466,4  | 280,8  | 135,7  | 37,8  | BA148_HW_BdTR11i | BdTR11i | 230,3 | 39,3  | 4,2   | 1,4  |
| BA102_HD_BdTR11i | BdTR11i | 483,9  | 567,1  | 981,6  | 139,8 | BA377_CW_BdTR11i | BdTR11i | 258,1 | 27,6  | 4     | 2,2  |
| BA128_HD_BdTR11i | BdTR11i | 505,6  | 651    | 1554,8 | 175,1 | BA526_CW_BdTR11i | BdTR11i | 443,8 | 72,9  | 8,3   | 5,2  |
| BA408_CD_BdTR11i | BdTR11i | 708,1  | 680,3  | 833,4  | 135,7 | BA022_HW_BdTR13a | BdTR13a | 345,6 | 79,5  | 5,7   | 0    |
| BA450_CD_BdTR11i | BdTR11i | 429,9  | 314,4  | 305,8  | 46,7  | BA174_HW_BdTR13a | BdTR13a | 324   | 45,8  | 2,6   | 2,6  |
| BA361_CD_BdTR12c | BdTR12c | 297,8  | 37     | 9,7    | 5,8   | BA371_CW_BdTR13a | BdTR13a | 213,6 | 23,8  | 6,7   | 0    |
| BA061_HD_BdTR13a | BdTR13a | 382    | 213,3  | 110,5  | 41,8  | BA405_CW_BdTR13a | BdTR13a | 310,6 | 30,7  | 14,6  | 3,8  |
| BA144_HD_BdTR13a | BdTR13a | 369,6  | 249,2  | 130,1  | 69,2  | BA070_HW_BdTR1i  | BdTR1i  | 274,8 | 23,6  | 2,5   | 0    |
| BA394_CD_BdTR13a | BdTR13a | 363,5  | 160    | 95,3   | 31,8  | BA155_HW_BdTR1i  | BdTR1i  | 375,1 | 48,1  | 5,9   | 3,8  |
| BA460_CD_BdTR13a | BdTR13a | 1347,2 | 930,2  | 735,4  | 270,3 | BA469_CW_BdTR1i  | BdTR1i  | 409,4 | 34,5  | 9     | 3,3  |
| BA108_HD_BdTR1i  | BdTR1i  | 639,7  | 788    | 1133,3 | 488,1 | BA486_CW_BdTR1i  | BdTR1i  | 348,4 | 78,2  | 5,4   | 2,6  |
| BA134_HD_BdTR1i  | BdTR1i  | 315,7  | 191,5  | 199,9  | 73,1  | BA115_HW_BdTR2b  | BdTR2b  | 348,7 | 11,1  | 0     | 0    |
| BA457_CD_BdTR1i  | BdTR1i  | 579,7  | 591,8  | 246,9  | 79    | BA133_HW_BdTR2b  | BdTR2b  | 270,5 | 58,2  | 6,4   | 3,9  |
| BA480_CD_BdTR1i  | BdTR1i  | 796,6  | 989,7  | 1329,2 | 364,4 | BA378_CW_BdTR2b  | BdTR2b  | 259,5 | 14,5  | 3,5   | 1,2  |
| BA003_HD_BdTR2b  | BdTR2b  | 874,2  | 662,1  | 896,5  | 314,5 | BA503_CW_BdTR2b  | BdTR2b  | 377,6 | 73,2  | 10,9  | 2,1  |
| BA091_HD_BdTR2b  | BdTR2b  | 658,5  | 524,5  | 502,4  | 140   | BA107_HW_BdTR2g  | BdTR2g  | 475,5 | 44,3  | 3,2   | 4,4  |
| BA389_CD_BdTR2b  | BdTR2b  | 299,5  | 213,3  | 177,2  | 58,6  | BA167_HW_BdTR2g  | BdTR2g  | 401,5 | 36,3  | 7,7   | 3,3  |
| BA472_CD_BdTR2b  | BdTR2b  | 320,5  | 222,3  | 168,1  | 32,5  | BA445_CW_BdTR2g  | BdTR2g  | 334,5 | 41,6  | 5,2   | 4,2  |
| BA124_HD_BdTR2g  | BdTR2g  | 784,1  | 1119   | 2009,5 | 616,6 | BA527_CW_BdTR2g  | BdTR2g  | 594,9 | 48,9  | 7,4   | 2,5  |
| BA165_HD_BdTR2g  | BdTR2g  | 402,6  | 473,2  | 1420,3 | 511,6 | BA071_HW_BdTR3c  | BdTR3c  | 349,4 | 22    | 2,1   | 1,4  |
| BA364_CD_BdTR2g  | BdTR2g  | 1009,2 | 1135,3 | 2063,8 | 712,3 | BA129_HW_BdTR3c  | BdTR3c  | 227,6 | 38,8  | 2,6   | 2,6  |
| BA369_CD_BdTR2g  | BdTR2g  | 806,3  | 537,8  | 578,2  | 230,2 | BA362_CW_BdTR3c  | BdTR3c  | 368,9 | 105,8 | 162,7 | 53,3 |
| BA073_HD_BdTR3c  | BdTR3c  | 432,8  | 335,1  | 402,5  | 61,8  | BA427_CW_BdTR3c  | BdTR3c  | 234,2 | 75,7  | 8,1   | 3,9  |
| BA172_HD_BdTR3c  | BdTR3c  | 676,9  | 752,3  | 1712,3 | 351,6 | BA160_HW_BdTR5i  | BdTR5i  | 258,8 | 48,1  | 3,3   | 0,4  |
| BA370_CD_BdTR3c  | BdTR3c  | 542,5  | 585,9  | 354,6  | 53,6  | BA372_CW_BdTR5i  | BdTR5i  | 119,9 | 23,4  | 9,3   | 1,5  |
| BA424_CD_BdTR3c  | BdTR3c  | 985,9  | 1131,8 | 1662   | 310,6 | BA464_CW_BdTR5i  | BdTR5i  | 455,1 | 38,7  | 6,5   | 5,2  |
| BA065_HD_BdTR5i  | BdTR5i  | 358,7  | 296    | 254,4  | 57,5  | BA113_HW_BdTR9k  | BdTR9k  | 270,8 | 55,8  | 0     | 0    |
| BA082_HD_BdTR5i  | BdTR5i  | 366,7  | 390,6  | 459,3  | 80,5  | BA125_HW_BdTR9k  | BdTR9k  | 282,5 | 32,3  | 5,4   | 2,7  |
| BA470_CD_BdTR5i  | BdTR5i  | 367,3  | 369,8  | 607    | 94    | BA383_CW_BdTR9k  | BdTR9k  | 309,8 | 41,3  | 2,6   | 0,4  |
| BA473_CD_BdTR5i  | BdTR5i  | 345,6  | 298,7  | 254,6  | 50,9  | BA515_CW_BdTR9k  | BdTR9k  | 0     | 0     | 0     | 0    |
| BA002_HD_BdTR9k  | BdTR9k  | 377,8  | 193,6  | 54,1   | 21,5  | BA118_HW_Bis1    | Bis1    | 252,7 | 32,8  | 2,3   | 0    |
| BA033_HD_BdTR9k  | BdTR9k  | 400,2  | 201,3  | 104,5  | 29,4  | BA156_HW_Bis1    | Bis1    | 577,5 | 32,3  | 10,6  | 1,1  |
| BA363_CD_BdTR9k  | BdTR9k  | 514,8  | 390,2  | 585,7  | 209,9 | BA385_CW_Bis1    | Bis1    | 237,8 | 29,9  | 3,4   | 1,7  |
| BA410_CD_BdTR9k  | BdTR9k  | 454,2  | 259,8  | 136,3  | 52,7  | BA390_CW_Bis1    | Bis1    | 276,9 | 51,3  | 4,2   | 0,6  |
| BA110_HD_Bis1    | Bis1    | 606,4  | 739,8  | 1165,4 | 357,5 | BA147_HW_Kah1    | Kah1    | 167,3 | 41,4  | 3,1   | 0    |
| BA142_HD_Bis1    | Bis1    | 544,7  | 393,2  | 352,6  | 133,2 | BA169_HW_Kah1    | Kah1    | 218   | 68,9  | 8,6   | 1,5  |
| BA373_CD_Bis1    | Bis1    | 455,8  | 282,8  | 276,4  | 64,5  | BA356_CW_Kah1    | Kah1    | 135   | 47,9  | 3     | 0,8  |

|                |      |        |        |        |        |               |      |       |       |      |      |
|----------------|------|--------|--------|--------|--------|---------------|------|-------|-------|------|------|
| BA519_CD_Bis1  | Bis1 | 288,5  | 152,2  | 181,6  | 43,3   | BA420_CW_Kah1 | Kah1 | 254,1 | 46,2  | 11,5 | 3,2  |
| BA046_HD_Kah1  | Kah1 | 251,7  | 91,2   | 14,7   | 1,5    | BA047_HW_Kah5 | Kah5 | 280,1 | 28,2  | 5,6  | 0,9  |
| BA168_HD_Kah1  | Kah1 | 184,9  | 185,4  | 223,9  | 41     | BA158_HW_Kah5 | Kah5 | 268,7 | 128,5 | 16   | 3,1  |
| BA382_CD_Kah1  | Kah1 | 552,3  | 517,7  | 470,1  | 81,4   | BA399_CW_Kah5 | Kah5 | 351,8 | 34    | 19,5 | 7,3  |
| BA495_CD_Kah1  | Kah1 | 552,7  | 775    | 912,6  | 139,7  | BA482_CW_Kah5 | Kah5 | 315,1 | 30,4  | 5,6  | 2    |
| BA048_HD_Kah5  | Kah5 | 401,4  | 219,2  | 144,2  | 44,3   | BA141_HW_Koz1 | Koz1 | 323,6 | 22,5  | 1    | 1    |
| BA095_HD_Kah5  | Kah5 | 386,8  | 648,6  | 480,8  | 58,5   | BA157_HW_Koz1 | Koz1 | 353   | 68,7  | 9,5  | 0,6  |
| BA401_CD_Kah5  | Kah5 | 444,7  | 708    | 526,8  | 88,6   | BA501_CW_Koz1 | Koz1 | 415,6 | 43,4  | 4,3  | 2,9  |
| BA489_CD_Kah5  | Kah5 | 498,2  | 867    | 776    | 154,1  | BA511_CW_Koz1 | Koz1 | 397,2 | 79,4  | 31,8 | 10,6 |
| BA127_HD_Koz1  | Koz1 | 337,2  | 319,5  | 341,6  | 41,9   | BA057_HW_Koz3 | Koz3 | 325,3 | 18,2  | 1,3  | 0    |
| BA132_HD_Koz1  | Koz1 | 377,6  | 429,1  | 638,9  | 75,8   | BA074_HW_Koz3 | Koz3 | 435,3 | 20,5  | 2    | 1,1  |
| BA395_CD_Koz1  | Koz1 | 458,4  | 415,4  | 127,4  | 27     | BA411_CW_Koz3 | Koz3 | 283,6 | 28,8  | 15,3 | 3,7  |
| BA507_CD_Koz1  | Koz1 | 505,3  | 585,8  | 388    | 84,8   | BA484_CW_Koz3 | Koz3 | 332,2 | 47,8  | 9,3  | 2,3  |
| BA081_HD_Koz3  | Koz3 | 523,6  | 592,8  | 892,7  | 120    | BA026_HW_Ron2 | Ron2 | 218   | 122,8 | 15,3 | 1,7  |
| BA388_CD_Koz3  | Koz3 | 1094,8 | 1066,9 | 5661,6 | 1244,7 | BA151_HW_Ron2 | Ron2 | 350,5 | 38,4  | 7    | 1,5  |
| BA467_CD_Koz3  | Koz3 | 1201,8 | 1447,1 | 4545,9 | 1203   | BA409_CW_Ron2 | Ron2 | 296,4 | 36,6  | 73,2 | 32,9 |
| BA089_HD_Koz-3 | Koz3 | 773,9  | 1189,3 | 2664,1 | 681,1  | BA431_CW_Ron2 | Ron2 | 259,2 | 15,4  | 6,5  | 4    |
| BA035_HD_Ron2  | Ron2 | 1429,9 | 1947,5 | 1398,8 | 364,2  |               |      |       |       |      |      |
| BA379_CD_Ron   | Ron2 | 264    | 166    | 74,8   | 15,9   |               |      |       |       |      |      |
| BA432_CD_Ron2  | Ron2 | 274,6  | 254,9  | 202,5  | 41,2   |               |      |       |       |      |      |

---

**Supplementary Table S8.** Summary statistics of dehydrin *Bdhn1a*, *Bdhn2*, *Bdhn3* and *Bdhn7* gene expressions under dry (D) vs watered (W) conditions and comparative differential expression (DE) tests in *B. distachyon* ecotypes. **(a)** Kruskal-Wallis rank tests (D vs W) for each *Bdhn* gene. **(b)** Wilcoxon pairwise tests of normalized TPM values across ecotypes, p-values were adjusted with the Benjamini–Hochberg (BH) procedure, controlling the false discovery rate, to correct for multiple comparisons; n. s., non significant, p≤ 0.05\* significant values are highlighted in bold.

**(a)**

| Var     | <i>Bdhn1a</i> | <i>Bdhn2</i> | <i>Bdhn3</i> | <i>Bdhn7</i> |
|---------|---------------|--------------|--------------|--------------|
| H test  | 123.74        | 179.98       | 178.8        | 175.02       |
| p-value | 7.69E-06      | 3.38E-13     | 5.10E-15     | 1.75E-12     |

**(b)**

| Ecotype         | <i>Bdhn1a</i> |         |        | <i>Bdhn2</i>   |               |        | <i>Bdhn3</i>   |              |        | <i>Bdhn7</i>   |             |        |
|-----------------|---------------|---------|--------|----------------|---------------|--------|----------------|--------------|--------|----------------|-------------|--------|
|                 | D             | W       | W-test | D              | W             | W-test | D              | W            | W-test | D              | W           | W-test |
| <b>ABR2</b>     | 214.175       | 159.875 | n.s    | <b>167.1</b>   | <b>46.05</b>  | *      | <b>172.425</b> | <b>18.65</b> | *      | <b>19.4</b>    | <b>2.3</b>  | *      |
| <b>ABR3</b>     | 263.775       | 215.833 | n.s    | 169.05         | 48.467        | n.s    | 219.875        | 15.167       | n.s    | 29.525         | 2.3         | n.s    |
| <b>ABR4</b>     | 247.15        | 269.375 | n.s    | 108.425        | 48.4          | n.s    | <b>62.175</b>  | <b>5.025</b> | *      | 15.1           | 2.4         | n.s    |
| <b>ABR5</b>     | 252.633       | 272.233 | n.s    | 311.233        | 37.6          | n.s    | 294.767        | 6.967        | n.s    | 51.6           | 2.967       | n.s    |
| <b>ABR6</b>     | 290.175       | 302.233 | n.s    | <b>204.525</b> | <b>23.433</b> | *      | 850.55         | 3.8          | n.s    | 41.55          | 3           | n.s    |
| <b>ABR8</b>     | 530.05        | 255.333 | n.s    | 359.425        | 31.767        | n.s    | 231.05         | 4.367        | n.s    | 127.775        | 1.333       | n.s    |
| <b>Adi10</b>    | 659.4         | 532.767 | n.s    | 935.575        | 40.133        | n.s    | 1216.925       | 8.4          | n.s    | 332.9          | 4.167       | n.s    |
| <b>Adi12</b>    | 488.65        | 418.675 | n.s    | <b>591.725</b> | <b>68.75</b>  | *      | <b>498.525</b> | <b>11.75</b> | *      | <b>139.825</b> | <b>4.45</b> | *      |
| <b>Adi2</b>     | 461.1         | 430     | n.s    | 511            | 56.733        | n.s    | 437.6          | 3.367        | n.s    | 63.567         | 3           | n.s    |
| <b>Bd1_1</b>    | 414.3         | 355.45  | n.s    | 152.35         | 32.25         | n.s    | 45.95          | 11.25        | n.s    | 14.95          | 2.75        | n.s    |
| <b>Bd18-1</b>   | 736.95        | 259.3   | n.s    | 548.1          | 19            | n.s    | 410.6          | 3.9          | n.s    | 172.9          | 0.45        | n.s    |
| <b>Bd21-3</b>   | 632.767       | 290.767 | n.s    | 890.1          | 25.8          | n.s    | 839.567        | 14.3         | n.s    | 360.667        | 1.5         | n.s    |
| <b>Bd21ctrl</b> | 326.85        | 300.1   | n.s    | 113.725        | 44.7          | n.s    | 30.575         | 16.375       | n.s    | 24.325         | 3.35        | n.s    |
| <b>Bd2-3</b>    | 502.175       | 368.35  | n.s    | 202.05         | 55.675        | n.s    | 94.825         | 3.925        | n.s    | 29.275         | 2.5         | n.s    |
| <b>Bd30-1</b>   | 488.675       | 365.05  | n.s    | <b>761.7</b>   | <b>33.575</b> | *      | <b>906.55</b>  | <b>5.725</b> | *      | <b>222.7</b>   | <b>2.3</b>  | *      |
| <b>Bd3-1</b>    | 395.167       | 361.967 | n.s    | 465.367        | 41.367        | n.s    | 1711.533       | 9.367        | n.s    | 329.433        | 1.233       | n.s    |
| <b>BdTR10c</b>  | 410.375       | 200.2   | n.s    | 327.65         | 43            | n.s    | 924.275        | 4.2          | n.s    | 194.1          | 1.75        | n.s    |
| <b>BdTR11g</b>  | 497.15        | 388.925 | n.s    | <b>454.7</b>   | <b>59.35</b>  | *      | <b>643.075</b> | <b>17.6</b>  | *      | <b>95.65</b>   | <b>7.2</b>  | *      |
| <b>BdTR11i</b>  | 531.875       | 325.433 | n.s    | 553.2          | 43.533        | n.s    | 918.9          | 5.033        | n.s    | 124.325        | 3.167       | n.s    |



|         |         |         |     |          |        |     |          |        |     |         |        |     |
|---------|---------|---------|-----|----------|--------|-----|----------|--------|-----|---------|--------|-----|
| BdTR13a | 697.567 | 298.45  | n.s | 434.5    | 44.95  | n.s | 313.733  | 7.4    | n.s | 114.633 | 1.6    | *   |
| BdTr1i  | 582.925 | 351.925 | n.s | 640.25   | 46.1   | *   | 727.325  | 5.7    | *   | 251.15  | 2.425  | *   |
| BdTR2b  | 538.175 | 318.55  | n.s | 405.55   | 43.85  | n.s | 436.05   | 7.2    | n.s | 136.4   | 1.65   | n.s |
| BdTR2g  | 750.55  | 451.6   | n.s | 816.325  | 42.775 | *   | 1517.95  | 5.875  | *   | 517.675 | 3.6    | *   |
| BdTR3c  | 659.525 | 317.5   | n.s | 701.275  | 67.833 | n.s | 1032.85  | 57.633 | n.s | 194.4   | 19.533 | n.s |
| BdTR5i  | 364.233 | 277.933 | n.s | 352.133  | 36.733 | n.s | 440.233  | 6.367  | n.s | 77.333  | 2.367  | n.s |
| BdTR9k  | 436.75  | 197.433 | n.s | 261.225  | 24.533 | n.s | 220.15   | 2.667  | n.s | 78.375  | 1.033  | n.s |
| Bis1    | 450.233 | 364.067 | n.s | 391.6    | 37.833 | n.s | 541.133  | 6.067  | n.s | 155.1   | 1.133  | n.s |
| Kah1    | 385.4   | 202.367 | n.s | 392.325  | 54.333 | n.s | 405.325  | 7.7    | n.s | 65.9    | 1.833  | n.s |
| Kah5    | 432.775 | 303.925 | *   | 610.7    | 55.275 | *   | 481.95   | 11.675 | *   | 86.375  | 3.325  | *   |
| Koz1    | 481.85  | 388.6   | n.s | 500.6    | 63.833 | n.s | 257.7    | 15.2   | n.s | 55.9    | 4.7    | n.s |
| Koz3    | 898.525 | 344.1   | *   | 1074.025 | 28.825 | *   | 3441.075 | 6.975  | *   | 812.2   | 1.775  | *   |
| RON2    | 656.167 | 288.3   | n.s | 789.467  | 65.933 | n.s | 558.7    | 31.833 | n.s | 140.433 | 12.033 | n.s |

**Supplementary Table S9.** Linear model (lm) regression analysis for comparative differential gene expressions of dehydrin *Bdhn* genes in the studied *B. distachyon* ecotypes. W (watered) and D (dry) conditions. Significant p-values ( $p \leq 0.001^{***}$ ).

[illegible]

**Supplementary Table S10.** Comparative analysis of dehydrin genes showing upregulated expression under drought compared to watered conditions in *Brachypodium distachyon* and *Triticum aestivum*. Orthology between the differentially expressed genes in the two species was retrieved through Ensembl Plants using BioMart and Blast searches using orthologies previously established in Galvez et al. (2019) (§).

| <i>Brachypodium distachyon</i> |                  |                  | <i>Triticum aestivum</i> |                                    |                    |                                                                              |
|--------------------------------|------------------|------------------|--------------------------|------------------------------------|--------------------|------------------------------------------------------------------------------|
| Gene name                      | RefSeq.v3.0 Name | Ref.Seqv3.1 Name | Original gene name       | Gene name in Supplementary Table 1 | RefSeq v2.1 Name   | Differentially expressed genes under drought conditions (Galvez et al. 2019) |
| <i>Bdhn1</i>                   | BRADI_5g10860v3  | Bradi5g10860     | DHN11-A1                 | DHNTaes 1                          | TraesCS6A02G253300 | Mild stress                                                                  |
| <i>Bdhn2</i>                   | BRADI_3g51200v3  | Bradi3g51200     | DHN11-B1                 | DHNTaes 3                          | TraesCS6B02G273400 |                                                                              |
|                                |                  |                  | DHN11-D1                 | DHNTaes 2                          | TraesCS6D02G234700 |                                                                              |
| <i>Bdhn3</i>                   | BRADI_1g37410v3  | Bradi1g37410     | DHN4-B1                  | DHNTaes 9                          | TraesCS6B02G383500 | Severe Stress                                                                |
|                                |                  |                  | DHN4-D1                  | DHNTaes 4                          | TraesCS6D02G332900 | Severe Stress                                                                |
|                                |                  |                  | DHN3-A1                  | DHNTaes 12                         | TraesCS6A02G350600 | Mild stress                                                                  |
|                                |                  |                  | DHN3-A5                  | DHNTaes 13                         | TraesCS6A02G350800 |                                                                              |
|                                |                  |                  | DHN3-A6                  | DHNTaes 8                          | TraesCS6A02G350700 | Mild stress                                                                  |
|                                |                  |                  | DHN3-B6                  | DHNTaes 10                         | TraesCS6B02G383600 | Mild stress                                                                  |
|                                |                  |                  | DHN3-D6                  | DHNTaes 5                          | TraesCS6D02G333200 | Severe Stress                                                                |
|                                |                  |                  | DHN3-D4                  | DHNTaes 11                         | TraesCS6D02G333100 | Severe Stress                                                                |
|                                |                  |                  | DHN3-D8                  | DHNTaes 6                          | TraesCS6D02G333300 |                                                                              |
|                                |                  |                  | DHN3-D9                  | DHNTaes 7                          | TraesCS6D02G333600 | Severe Stress                                                                |
| <i>Bdhn7</i>                   | BRADI_3g43870v3  | Bradi3g43870     | DHN38-A1                 | DHNTaes 14                         | TraesCS5A02G424700 |                                                                              |
|                                |                  |                  | DHN38-B1                 | DHNTaes 16                         | TraesCS5B02G426700 | Severe Stress                                                                |
|                                |                  |                  | DHN38-D1§                | DHNTaes 18§                        | TraesCS5D01G433200 |                                                                              |
|                                |                  |                  | DHN38-A2                 | DHNTaes 15                         | TraesCS5A02G424800 |                                                                              |
|                                |                  |                  | DHN38-B2§                | DHNTaes 17§                        | TraesCS5B01G426800 | Severe Stress                                                                |
|                                |                  |                  | DHN38-D2                 | DHNTaes 19                         | TraesCS5D02G433300 |                                                                              |

**Supplementary Table S11.** Summary statistics of 12 drought-response phenotypic traits [leaf\_rwc (relative water content in leaf); leaf\_wc (water content in leaf); lma (leaf mass per área); pro (leaf proline content); abvrgd (above ground biomass); blwgrd (below ground biomass); ttlmass (total mass); rmr (root mass ratio); delta13c (carbon isotope, a proxy for lifetime integrated WUE); leafc (leaf carbon content); leafn (leaf nitrogen content); cn (leaf carbon/nitrogen ratio)] in dry (D) vs watered (W) *Brachypodium distachyon* plants. **(a)** Kruskall-Wallis rank tests (W vs D) for each phenotypic trait. **(b)** comparative pairwise Wilcoxon tests in the studied *B. distachyon* ecotypes; p-values were adjusted with the Benjamini–Hochberg (BH) procedure, controlling the false discovery rate, to correct for multiple comparisons; n, number of replicates. n. s., non significant, \*p≤ 0.05\*; significant values are highlighted in bold.

**(a)**

| Var     | Leaf_rwc    | Leaf_wc     | Lma         | Pro         | abvgrd      | blwgrd      | ttlmas      | rmr         | WUE         | leafC       | LeafN       | C:N         |
|---------|-------------|-------------|-------------|-------------|-------------|-------------|-------------|-------------|-------------|-------------|-------------|-------------|
| t-test  | 197.24      | 172.97      | 166.68      | 189.78      | 190.61      | 161.24      | 181.31      | 192.97      | 192.67      | 169.61      | 188.34      | 188.8       |
| df      | 63          | 63          | 63          | 63          | 63          | 63          | 63          | 63          | 63          | 63          | 63          | 63          |
| p-value | 9.46E-16*** | 3.42E-12*** | 2.62E-11*** | 1.24E-14*** | 9.32E-15*** | 1.47E-10*** | 2.17E-13*** | 4.15E-15*** | 4.60E-15*** | 1.02E-11*** | 2.02E-14*** | 7.32E-15*** |

**(b)**

| Ecotype  | n | leaf_rwc |        |        | leafwc |        |        | lma   |       |        | pro   |       |        | abvgrd |        |        | blwgrd |       |        |
|----------|---|----------|--------|--------|--------|--------|--------|-------|-------|--------|-------|-------|--------|--------|--------|--------|--------|-------|--------|
|          |   | D        | W      | W-test | D      | W      | W-test | D     | W     | W-test | D     | W     | W-test | D      | W      | W-test | D      | W     | W-test |
| ABR2     | 4 | 95.92    | 99.09  | *      | 275.41 | 327.41 | *      | 31.09 | 27.07 | *      | 39.54 | 17.51 | *      | 82.39  | 82.83  | n.s    | 54.70  | 39.94 | n.s    |
| ABR3     | 4 | 95.91    | 99.23  | *      | 325.50 | 341.29 | n.s    | 24.83 | 23.35 | n.s    | 18.48 | 9.26  | *      | 94.28  | 113.30 | n.s    | 57.44  | 52.51 | n.s    |
| ABR4     | 4 | 96.62    | 99.44  | *      | 312.84 | 357.86 | *      | 28.94 | 27.19 | n.s    | 15.44 | 8.76  | *      | 53.93  | 63.83  | *      | 32.19  | 29.34 | *      |
| ABR5     | 3 | 95.28    | 100.14 | n.s    | 309.74 | 355.00 | n.s    | 27.51 | 23.67 | n.s    | 12.79 | 7.68  | n.s    | 83.10  | 84.11  | n.s    | 55.12  | 33.31 | n.s    |
| ABR6     | 4 | 95.07    | 99.73  | *      | 300.31 | 334.41 | *      | 27.93 | 25.84 | *      | 24.37 | 10.16 | *      | 72.96  | 80.03  | n.s    | 40.48  | 30.95 | *      |
| ABR8     | 4 | 94.01    | 99.09  | *      | 327.95 | 359.65 | n.s    | 30.93 | 27.92 | *      | 25.45 | 8.00  | *      | 112.43 | 172.49 | *      | 33.23  | 40.93 | *      |
| Adi10    | 4 | 92.50    | 99.49  | *      | 333.21 | 372.90 | *      | 28.86 | 24.35 | *      | 54.79 | 10.94 | *      | 133.87 | 225.64 | *      | 67.65  | 80.73 | n.s    |
| Adi12    | 4 | 92.10    | 99.41  | *      | 291.01 | 322.88 | *      | 29.34 | 26.69 | *      | 30.06 | 10.47 | *      | 141.38 | 168.85 | *      | 70.54  | 57.79 | *      |
| Adi2     | 3 | 94.99    | 97.91  | n.s    | 282.54 | 307.59 | n.s    | 28.99 | 25.70 | n.s    | 40.57 | 8.61  | n.s    | 102.75 | 161.41 | n.s    | 55.39  | 49.99 | n.s    |
| Bd1-1    | 2 | 96.65    | 99.49  | n.s    | 318.06 | 340.96 | n.s    | 27.89 | 26.05 | n.s    | 22.48 | 8.68  | n.s    | 69.95  | 70.85  | n.s    | 32.68  | 28.03 | n.s    |
| Bd18-1   | 2 | 92.46    | 98.01  | n.s    | 305.47 | 330.20 | n.s    | 29.18 | 26.35 | n.s    | 26.56 | 9.00  | n.s    | 127.49 | 166.53 | n.s    | 60.50  | 52.55 | n.s    |
| Bd21ctrl | 4 | 94.72    | 98.53  | *      | 348.66 | 370.79 | n.s    | 29.95 | 28.19 | n.s    | 16.88 | 7.80  | *      | 104.63 | 104.94 | n.s    | 48.95  | 34.90 | *      |
| Bd21-3   | 3 | 88.24    | 99.96  | n.s    | 300.78 | 333.15 | n.s    | 34.40 | 29.66 | n.s    | 46.00 | 7.99  | n.s    | 132.92 | 166.58 | n.s    | 76.00  | 57.59 | n.s    |
| Bd2-3    | 4 | 94.68    | 99.54  | *      | 301.70 | 323.22 | n.s    | 29.30 | 27.49 | *      | 24.56 | 7.18  | *      | 109.68 | 142.81 | *      | 52.55  | 48.69 | n.s    |
| Bd30-1   | 4 | 91.94    | 98.74  | *      | 290.94 | 360.88 | *      | 29.98 | 24.18 | *      | 39.52 | 8.27  | *      | 108.47 | 150.05 | *      | 55.83  | 70.51 | *      |
| Bd3-1    | 3 | 87.95    | 98.93  | *      | 314.60 | 346.29 | *      | 30.34 | 26.74 | *      | 39.47 | 11.38 | *      | 147.08 | 202.11 | *      | 64.45  | 66.88 | n.s    |
| BdTR10c  | 4 | 92.18    | 99.85  | n.s    | 292.36 | 346.45 | n.s    | 28.54 | 24.40 | n.s    | 62.13 | 9.26  | n.s    | 122.84 | 179.83 | n.s    | 54.84  | 78.85 | n.s    |
| BdTR11g  | 4 | 92.67    | 99.17  | *      | 303.40 | 348.85 | *      | 30.29 | 28.51 | n.s    | 26.36 | 6.46  | *      | 118.32 | 162.40 | *      | 58.96  | 59.50 | n.s    |
| BdTR11i  | 4 | 92.16    | 98.87  | *      | 301.41 | 356.48 | *      | 31.49 | 26.81 | *      | 44.23 | 7.77  | *      | 123.81 | 151.69 | *      | 54.83  | 57.03 | n.s    |

|         |   |              |              |     |               |               |     |              |              |     |              |              |     |               |               |     |              |              |     |
|---------|---|--------------|--------------|-----|---------------|---------------|-----|--------------|--------------|-----|--------------|--------------|-----|---------------|---------------|-----|--------------|--------------|-----|
| BdTR13a | 3 | <b>94.01</b> | <b>99.13</b> | *   | <b>298.81</b> | <b>335.52</b> | *   | <b>30.04</b> | <b>28.16</b> | *   | <b>20.39</b> | <b>7.56</b>  | *   | <b>101.63</b> | <b>130.20</b> | *   | 50.92        | 49.18        | n.s |
| BdTR1i  | 4 | <b>91.62</b> | <b>98.50</b> | *   | <b>291.95</b> | <b>310.40</b> | *   | <b>27.84</b> | <b>25.64</b> | *   | <b>42.46</b> | <b>11.32</b> | *   | <b>132.79</b> | <b>172.05</b> | *   | 67.58        | 65.85        | n.s |
| BdTR2b  | 4 | 90.58        | 99.16        | n.s | 286.28        | 334.79        | n.s | 30.04        | 25.59        | n.s | 32.55        | 9.08         | n.s | 135.43        | 184.43        | n.s | 69.31        | 74.33        | n.s |
| BdTR2g  | 4 | <b>88.23</b> | <b>99.03</b> | *   | <b>275.58</b> | <b>321.83</b> | *   | <b>30.19</b> | <b>25.78</b> | *   | <b>54.82</b> | <b>10.80</b> | *   | 141.09        | 152.06        | n.s | 78.53        | 55.90        | n.s |
| BdTR3c  | 4 | <b>91.01</b> | <b>99.87</b> | *   | <b>287.62</b> | <b>335.43</b> | *   | <b>29.31</b> | <b>24.88</b> | *   | <b>29.50</b> | <b>8.46</b>  | *   | 106.26        | 174.36        | n.s | 58.46        | 55.66        | n.s |
| BdTR5i  | 3 | 92.84        | 98.68        | n.s | 292.29        | 324.81        | n.s | 31.54        | 26.77        | n.s | 42.44        | 9.39         | n.s | 97.23         | 141.26        | n.s | 62.53        | 64.18        | n.s |
| BdTR9k  | 4 | <b>95.21</b> | <b>98.97</b> | *   | 303.20        | 315.82        | n.s | 27.63        | 28.14        | n.s | <b>19.61</b> | <b>14.46</b> | *   | 133.27        | 151.78        | n.s | 58.40        | 51.30        | n.s |
| Bisl    | 3 | 93.77        | 98.41        | n.s | 300.90        | 329.00        | n.s | 29.34        | 25.63        | n.s | 21.24        | 7.71         | n.s | 97.16         | 113.62        | n.s | 45.96        | 41.93        | n.s |
| Kah1    | 4 | <b>94.02</b> | <b>99.23</b> | *   | 315.47        | 334.60        | n.s | 29.18        | 28.18        | n.s | <b>31.07</b> | <b>9.33</b>  | *   | <b>109.04</b> | <b>136.56</b> | *   | <b>55.51</b> | <b>48.92</b> | *   |
| Kah5    | 4 | <b>93.11</b> | <b>98.86</b> | *   | 311.66        | 343.46        | n.s | 27.96        | 26.56        | n.s | <b>33.53</b> | <b>7.36</b>  | *   | <b>122.20</b> | <b>161.41</b> | *   | 48.54        | 50.30        | n.s |
| Koz1    | 2 | 95.95        | 99.58        | n.s | 332.48        | 335.81        | n.s | 26.64        | 26.38        | n.s | 16.15        | 7.35         | n.s | 82.20         | 135.72        | n.s | 56.78        | 46.36        | n.s |
| Koz3    | 4 | <b>85.40</b> | <b>99.62</b> | *   | <b>310.63</b> | <b>366.61</b> | *   | <b>30.12</b> | <b>23.45</b> | *   | <b>44.27</b> | <b>5.49</b>  | *   | 122.40        | 167.18        | n.s | 62.03        | 56.69        | n.s |
| RON2    | 3 | 94.61        | 99.50        | n.s | 335.71        | 366.35        | n.s | 27.23        | 24.52        | n.s | 30.60        | 7.88         | n.s | 93.14         | 133.44        | n.s | 63.23        | 62.31        | n.s |

| Ecotype  | n | ttlmass       |               |        | rmr          |              |        | WUE          |              |        | leafc         |               |        | leafn         |               |        | cn           |              |        |
|----------|---|---------------|---------------|--------|--------------|--------------|--------|--------------|--------------|--------|---------------|---------------|--------|---------------|---------------|--------|--------------|--------------|--------|
|          |   | D             | W             | W-test | D            | W            | W-test | D            | W            | W-test | D             | W             | W-test | D             | W             | W-test | D            | W            | W-test |
| ABR2     | 4 | 137.09        | 122.76        | n.s    | <b>38.89</b> | <b>33.48</b> | *      | <b>11.32</b> | <b>10.27</b> | *      | -31.00        | -31.29        | n.s    | <b>397.18</b> | <b>394.22</b> | *      | <b>35.17</b> | <b>39.21</b> | *      |
| ABR3     | 4 | 151.72        | 165.80        | n.s    | <b>37.51</b> | <b>31.32</b> | *      | 12.01        | 9.45         | n.s    | <b>-30.66</b> | <b>-31.50</b> | *      | <b>401.27</b> | <b>389.46</b> | *      | <b>33.47</b> | <b>41.64</b> | *      |
| ABR4     | 4 | 86.11         | 93.11         | n.s    | <b>37.90</b> | <b>31.43</b> | *      | <b>11.37</b> | <b>9.41</b>  | *      | -30.98        | -31.69        | n.s    | <b>402.26</b> | <b>397.76</b> | *      | <b>35.51</b> | <b>42.42</b> | *      |
| ABR5     | 3 | 138.14        | 117.42        | n.s    | 39.48        | 27.78        | n.s    | 10.80        | 9.06         | n.s    | -31.21        | -32.05        | n.s    | 397.90        | 389.95        | n.s    | 37.03        | 43.31        | n.s    |
| ABR6     | 4 | 113.44        | 110.98        | n.s    | <b>35.52</b> | <b>27.32</b> | *      | <b>11.77</b> | <b>9.26</b>  | *      | <b>-31.30</b> | <b>-31.93</b> | *      | <b>404.47</b> | <b>389.55</b> | *      | <b>34.51</b> | <b>42.18</b> | *      |
| ABR8     | 4 | <b>145.65</b> | <b>213.41</b> | *      | <b>23.44</b> | <b>19.36</b> | *      | 12.49        | 11.39        | n.s    | <b>-31.33</b> | <b>-31.58</b> | *      | 393.03        | 383.02        | n.s    | 31.77        | 34.08        | n.s    |
| Adi10    | 4 | <b>201.51</b> | <b>305.91</b> | *      | <b>33.44</b> | <b>26.40</b> | *      | <b>12.53</b> | <b>12.19</b> | *      | <b>-30.84</b> | <b>-31.58</b> | *      | 397.39        | 388.03        | n.s    | 31.74        | 32.45        | n.s    |
| Adi12    | 4 | 211.91        | 226.64        | n.s    | <b>33.45</b> | <b>24.94</b> | *      | <b>12.47</b> | <b>10.13</b> | *      | <b>-30.34</b> | <b>-31.28</b> | *      | <b>400.60</b> | <b>390.93</b> | *      | <b>32.22</b> | <b>38.80</b> | *      |
| Adi2     | 3 | 158.14        | 211.40        | n.s    | 34.89        | 23.65        | n.s    | 12.80        | 11.38        | n.s    | -30.63        | -31.27        | n.s    | 396.23        | 389.55        | n.s    | 31.17        | 34.69        | n.s    |
| Bd1-1    | 2 | 102.62        | 98.88         | n.s    | 32.62        | 28.27        | n.s    | 12.27        | 8.92         | n.s    | -30.71        | -31.69        | n.s    | 396.41        | 386.51        | n.s    | 32.63        | 43.38        | n.s    |
| Bd18-1   | 2 | 188.09        | 219.08        | n.s    | 31.97        | 23.64        | n.s    | 12.44        | 11.16        | n.s    | -30.57        | -31.84        | n.s    | 407.79        | 397.53        | n.s    | 32.83        | 36.54        | n.s    |
| Bd21ctrl | 4 | <b>153.58</b> | <b>139.84</b> | *      | <b>31.91</b> | <b>25.87</b> | *      | <b>12.58</b> | <b>9.82</b>  | *      | <b>-30.22</b> | <b>-31.43</b> | *      | <b>403.73</b> | <b>388.69</b> | *      | <b>32.31</b> | <b>39.63</b> | *      |
| Bd21-3   | 3 | 208.92        | 224.17        | n.s    | 35.09        | 25.19        | n.s    | 11.57        | 11.10        | n.s    | -31.03        | -31.93        | n.s    | 396.29        | 389.81        | n.s    | 34.28        | 35.17        | n.s    |
| Bd2-3    | 4 | <b>162.12</b> | <b>191.49</b> | *      | <b>32.24</b> | <b>25.42</b> | *      | 12.63        | 10.64        | n.s    | <b>-30.73</b> | <b>-31.27</b> | *      | <b>394.31</b> | <b>381.89</b> | *      | <b>31.43</b> | <b>36.48</b> | *      |
| Bd30-1   | 4 | <b>164.29</b> | <b>220.57</b> | *      | 34.51        | 32.28        | n.s    | <b>11.14</b> | <b>10.05</b> | *      | <b>-31.16</b> | <b>-32.11</b> | *      | <b>386.45</b> | <b>376.32</b> | *      | <b>34.98</b> | <b>37.58</b> | *      |
| Bd3-1    | 3 | <b>211.52</b> | <b>268.99</b> | *      | <b>31.01</b> | <b>24.91</b> | *      | <b>13.24</b> | <b>10.75</b> | *      | <b>-30.66</b> | <b>-32.08</b> | *      | <b>394.78</b> | <b>387.37</b> | *      | <b>29.94</b> | <b>36.25</b> | *      |
| BdTR10c  | 4 | 177.68        | 258.67        | n.s    | 31.05        | 30.12        | n.s    | 13.38        | 11.49        | n.s    | -30.71        | -31.65        | n.s    | 402.76        | 390.60        | n.s    | 30.43        | 34.09        | n.s    |
| BdTR11g  | 4 | <b>177.28</b> | <b>221.90</b> | *      | <b>33.12</b> | <b>26.75</b> | *      | <b>12.31</b> | <b>11.47</b> | *      | <b>-31.34</b> | <b>-32.07</b> | *      | 401.69        | 391.18        | n.s    | 32.85        | 34.58        | n.s    |
| BdTR11i  | 4 | <b>178.64</b> | <b>208.72</b> | *      | <b>31.09</b> | <b>27.21</b> | *      | <b>12.52</b> | <b>10.94</b> | *      | <b>-31.11</b> | <b>-31.91</b> | *      | 399.66        | 384.59        | n.s    | 32.06        | 36.11        | n.s    |
| BdTR13a  | 3 | <b>152.54</b> | <b>179.38</b> | *      | <b>33.35</b> | <b>27.44</b> | *      | <b>11.89</b> | <b>10.37</b> | *      | -31.26        | -32.08        | n.s    | <b>399.54</b> | <b>393.72</b> | *      | <b>33.74</b> | <b>38.07</b> | *      |

|        |   |               |               |     |              |              |     |              |              |     |               |               |     |               |               |     |              |              |     |
|--------|---|---------------|---------------|-----|--------------|--------------|-----|--------------|--------------|-----|---------------|---------------|-----|---------------|---------------|-----|--------------|--------------|-----|
| BdTR1i | 4 | 200.37        | 237.90        | n.s | <b>33.23</b> | <b>26.66</b> | *   | <b>12.99</b> | <b>11.00</b> | *   | <b>-30.33</b> | <b>-31.11</b> | *   | <b>401.43</b> | <b>389.86</b> | *   | <b>31.01</b> | <b>35.67</b> | *   |
| BdTR2b | 4 | 204.81        | 258.75        | n.s | 33.70        | 28.43        | n.s | 12.36        | 9.81         | n.s | -30.46        | -31.97        | n.s | 402.35        | 396.22        | n.s | 32.69        | 40.70        | n.s |
| BdTR2g | 4 | 219.62        | 207.97        | n.s | <b>35.40</b> | <b>27.05</b> | *   | <b>12.52</b> | <b>12.08</b> | *   | -30.43        | -31.05        | n.s | 397.63        | 392.77        | n.s | 31.94        | 33.34        | n.s |
| BdTR3c | 4 | <b>164.73</b> | <b>230.02</b> | *   | <b>35.42</b> | <b>24.14</b> | *   | <b>13.88</b> | <b>11.71</b> | *   | <b>-30.84</b> | <b>-31.73</b> | *   | <b>404.11</b> | <b>392.73</b> | *   | <b>29.21</b> | <b>33.63</b> | *   |
| BdTR5i | 3 | 159.77        | 205.44        | n.s | 38.12        | 30.36        | n.s | 12.04        | 10.29        | n.s | -31.08        | -31.94        | n.s | 400.25        | 389.96        | n.s | 33.50        | 38.15        | n.s |
| BdTR9k | 4 | 191.67        | 203.08        | n.s | <b>31.27</b> | <b>25.03</b> | *   | <b>12.35</b> | <b>10.09</b> | *   | <b>-30.75</b> | <b>-31.74</b> | *   | <b>405.45</b> | <b>385.74</b> | *   | <b>33.06</b> | <b>38.39</b> | *   |
| Bis1   | 3 | 143.08        | 155.54        | n.s | 33.24        | 27.64        | n.s | 12.22        | 10.28        | n.s | -31.34        | -32.29        | n.s | 400.67        | 391.98        | n.s | 32.82        | 38.27        | n.s |
| Kah1   | 4 | 164.55        | 185.48        | n.s | <b>33.74</b> | <b>26.03</b> | *   | <b>12.89</b> | <b>9.85</b>  | *   | <b>-30.89</b> | <b>-31.79</b> | *   | <b>402.98</b> | <b>390.96</b> | *   | <b>31.44</b> | <b>39.79</b> | *   |
| Kah5   | 4 | <b>170.74</b> | <b>211.70</b> | *   | <b>28.57</b> | <b>23.54</b> | *   | <b>12.54</b> | <b>10.60</b> | *   | <b>-30.50</b> | <b>-31.22</b> | *   | <b>403.40</b> | <b>393.09</b> | *   | <b>32.24</b> | <b>37.22</b> | *   |
| Koz1   | 2 | 138.98        | 182.08        | n.s | 40.08        | 25.48        | n.s | 12.58        | 10.89        | n.s | -31.28        | -31.70        | n.s | 404.89        | 397.19        | n.s | 32.45        | 36.64        | n.s |
| Koz3   | 4 | 184.43        | 223.87        | n.s | <b>33.05</b> | <b>25.26</b> | *   | <b>13.20</b> | <b>11.25</b> | *   | <b>-30.74</b> | <b>-31.80</b> | *   | <b>405.07</b> | <b>393.25</b> | *   | <b>30.73</b> | <b>35.26</b> | *   |
| RON2   | 3 | 157.49        | 195.76        | n.s | 38.91        | 31.37        | n.s | 11.70        | 10.03        | n.s | -30.61        | -31.32        | n.s | 404.26        | 396.07        | n.s | 35.48        | 39.74        | n.s |

**Supplementary Table S12.** Linear model (lm) regression analysis for comparative *Brachypodium distachyon* *Bdhn* gene expressions and drought-induced phenotypic trait changes under total watered (W) and dry (D) conditions. Significant p-values (p≤ 0.05\*; 0.01\*\*; 0.001\*\*\*).

| traits   | <i>Bdhn1a</i> |           |             |               | <i>Bdhn2</i> |           |             |             | <i>Bdhn3</i> |           |             |             | <i>Bdhn7</i> |           |             |             |
|----------|---------------|-----------|-------------|---------------|--------------|-----------|-------------|-------------|--------------|-----------|-------------|-------------|--------------|-----------|-------------|-------------|
|          | median        | Std error | F-statistic | p-value       | median       | Std error | F-statistic | p-value     | median       | Std error | F-statistic | p-value     | median       | Std error | F-statistic | p-value     |
| leaf_rwc | -34.83        | 196.9     | 51.03       | 1.227E-11 *** | -41.95       | 265.3     | 169.3       | <2E-16***   | -8.7         | 564.8     | 136.8       | <2E-16***   | -4.23        | 145.1     | 129.7       | <2E-16***   |
| leaf_wc  | -49.32        | 213.2     | 10.19       | 0.001609**    | -70.69       | 321.3     | 43.09       | 3.51E-10*** | -166.9       | 682.3     | 22.33       | 4.02E-06*** | -43.52       | 174.8     | 16.68       | 2.32E-05*** |
| lma      | -54.08        | 213.8     | 9.029       | 0.0025955 **  | -96.58       | 321.2     | 43.25       | 3.28E-10*** | -188         | 689.2     | 17.37       | 4.38E05***  | -46.48       | 175.3     | 17.44       | 4.22E-05*** |
| pro      | -46.12        | 210.7     | 15.82       | 9.36E-05***   | -93.89       | 308.5     | 66.03       | 2.85E-14*** | -127.6       | 649.7     | 47.99       | 4.37E-11*** | -30.73       | 166.5     | 43.91       | 2.47E-10*** |
| abvgrd   | -53.51        | 217.9     | 0.1635      | 0.6864        | -136.1       | 346.7     | 4.911       | 0.0277*     | -270.9       | 713.4     | 1.055       | 0.30554     | -71.82       | 181.8     | 0.08986     | 0.765       |
| blwgrd   | -40.97        | 208.7     | 20.63       | 9.07E-06***   | -72.33       | 333.1     | 24.22       | 1.65E-06*** | -165.2       | 687       | 18.89       | 2.09E-05*** | -38.5        | 173       | 23.87       | 1.95E-06*** |
| ttlmass  | -52.88        | 216.7     | 2.607       | 0.1078        | -175         | 350.4     | 0.1187      | 0.73078     | -293.4       | 714.8     | 0.1826      | 0.6695      | -58.21       | 181.3     | 1.305       | 0.255       |
| rmr      | -35.02        | 213.1     | 10.56       | 0.001331**    | -77.24       | 313.3     | 56.99       | 1.06E-12*** | -152.7       | 674.7     | 27.97       | 2.90E-07*** | -41.8        | 174       | 20.85       | 8.16E-06*** |
| WUE      | -129.55       | 206.2     | 26.68       | 5.26E-07***   | -52.93       | 308       | 66.88       | 2.04E-14*** | -122.5       | 664.9     | 35.53       | 9.50E-09*** | -31.64       | 167.8     | 39.49       | 1.67E-09*** |
| leafC    | -39.98        | 210.7     | 15.95       | 8.80E-05***   | -90.2        | 323.7     | 39.07       | 2E-09***    | -183.4       | 682.8     | 21.94       | 4.85E-06*** | -50.17       | 175.8     | 15.87       | 9.14E-05*** |
| leafN    | -42.83        | 199.8     | 43.07       | 3.54E-10***   | -62.2        | 311.9     | 59.54       | 3.77E-13*** | -160.7       | 658.5     | 40.66       | 1.E-09***   | -44.7        | 169       | 36.01       | 7.69E-09*** |
| CN       | -40.24        | 198.4     | 46.9        | 6.93E-11***   | -58.73       | 307.7     | 67.44       | 1.64E-14*** | -131.6       | 652.1     | 45.95       | 1.04E-10*** | -33.83       | 168       | 39.09       | 1.98E-09*** |

**Supplementary Table S13.** Phylogenetic signal of dehydrin gene expressions under watered (W) and dry (D) conditions, drought-induced phenotypic traits changes and climate niche variation assessed in **(a)** the *B. distachyon* nuclear-SNP tree and **(b)** the *B. distachyon* *Bdhn* tree using the *phylosig* option of the *phytools* R package. Blomberg’s K and Pagel’s lambda values close to one indicate phylogenetic signal and values close to zero phylogenetic independence. K, p-values based on 1000 randomizations; lambda, p-values based on the Likelihood Ratio test. Significant and marginal significant values are highlighted in bold.

**(a)**

| <i>Bdhn</i> gene | Treatment | K          | P-value | lambda( $\lambda$ ) | logL( $\lambda$ ) | LR( $\lambda=0$ ) | P-value |
|------------------|-----------|------------|---------|---------------------|-------------------|-------------------|---------|
| <i>Bdhn1aW</i>   | W         | 0.00207548 | 0.579   | 6.6113E-05          | -170094           | -9.01E-04         | 1       |
| <i>Bdhn2W</i>    |           | 0.00467069 | 0.235   | 6.6113E-05          | -111372           | -9.77E-04         | 1       |
| <i>Bdhn3W</i>    |           | 0.00236035 | 0.553   | 6.6113E-05          | -90.2705          | -1.13E-03         | 1       |
| <i>Bdhn7W</i>    |           | 0.00162038 | 0.695   | 6.6113E-05          | -59.9152          | -1.39E-03         | 1       |
| <i>Bdhn1aD</i>   | D         | 0.0038235  | 0.317   | 6.6113E-05          | -194.936          | -1.03E-03         | 1       |
| <i>Bdhn2D</i>    |           | 0.00311909 | 0.364   | 6.6113E-05          | -209.636          | -1.03E-03         | 1       |
| <i>Bdhn3D</i>    |           | 0.00257041 | 0.71    | 6.6113E-05          | -237.428          | -1.06E-03         | 1       |
| <i>Bdhn7D</i>    |           | 0.00137242 | 0.753   | 6.6113E-05          | -196.53           | -1.04E-03         | 1       |



|                  | Drought          |                                        |                     |                   |                   |                   | Watered          |              |                     |                   |                   |                   |
|------------------|------------------|----------------------------------------|---------------------|-------------------|-------------------|-------------------|------------------|--------------|---------------------|-------------------|-------------------|-------------------|
| Phenotypic trait | K                | P-value (based on 1000 randomizations) | lambda( $\lambda$ ) | logL( $\lambda$ ) | LR( $\lambda=0$ ) | P-value           | K                | P-value      | lambda( $\lambda$ ) | logL( $\lambda$ ) | LR( $\lambda=0$ ) | P-value           |
| leaf_rwc         | 0.00595303       | 0.202                                  | 0.8240433           | -70.83287         | -71.94764         | 0.1353942         | 0.00633355       | 0.137        | 6.6113E-05          | -21.1366          | -21.1361          | 1                 |
| leaf_wc          | 0.0191719        | 0.029                                  | 0.5318181           | -129.0792         | -129.2025         | 0.6194317         | 0.00601205       | 0.142        | 0.712778            | -124.3118         | -124.641          | 0.4171331         |
| lma              | 0.00655413       | 0.198                                  | 0.4014225           | -60.3207          | -60.04825         | 1                 | <b>0.0127346</b> | <b>0.067</b> | 0.5672695           | -53.1973          | -54.02652         | 0.1978138         |
| pro              | 0.00178069       | 0.645                                  | 6.61128E-05         | -118.2053         | -118.2048         | 1                 | 0.00751385       | 0.279        | 6.6113E-05          | -65.7397          | -65.73915         | 1                 |
| <b>abvrgd</b>    | <b>0.0548587</b> | <b>0.005</b>                           | <b>0.9862024</b>    | <b>-132.3802</b>  | <b>-137.5324</b>  | <b>0.00132712</b> | 0.00982265       | 0.118        | <b>0.9056281</b>    | <b>-143.4905</b>  | <b>-147.2048</b>  | <b>0.00641901</b> |
| blwgrd           | 0.00799846       | 0.135                                  | 0.6778591           | -112.6454         | -113.232          | 0.2787568         | 0.00503958       | 0.192        | 0.372553            | -117.8161         | -117.602          | 1                 |
| <b>ttlmass</b>   | <b>0.0254584</b> | <b>0.02</b>                            | <b>0.9586421</b>    | <b>-144.0437</b>  | <b>-147.1176</b>  | <b>0.01315614</b> | 0.00760606       | 0.15         | <b>0.8313881</b>    | <b>-153.3088</b>  | <b>-155.4348</b>  | <b>0.0392068</b>  |
| rmr              | 0.0117638        | 0.1                                    | <b>0.8587116</b>    | <b>-71.60054</b>  | <b>-74.00027</b>  | <b>0.02846858</b> | <b>0.0198041</b> | <b>0.031</b> | <b>0.8500612</b>    | <b>-65.57032</b>  | <b>-69.23347</b>  | <b>0.00679529</b> |
| <b>delta13c</b>  | <b>0.0206935</b> | <b>0.023</b>                           | 0.5455282           | -9.438273         | -9.102205         | 1                 | 0.00079528       | 0.921        | 6.6113E-05          | -9.565582         | -9.565045         | 1                 |
| leafc            | 0.00564166       | 0.206                                  | 6.61128E-05         | -86.81046         | -86.80988         | 1                 | 0.00344133       | 0.413        | 6.6113E-05          | -84.79111         | -84.79067         | 1                 |
| <b>leafn</b>     | <b>0.0127895</b> | <b>0.066</b>                           | <b>0.8379002</b>    | <b>-52.22653</b>  | <b>-57.04403</b>  | <b>0.00190906</b> | 0.00111356       | 0.809        | 0.6412875           | -71.1111          | -72.40537         | 0.1076397         |
| <b>cn</b>        | <b>0.015233</b>  | <b>0.051</b>                           | <b>0.8350859</b>    | <b>-24.49639</b>  | <b>-28.06983</b>  | <b>0.00750945</b> | 0.00101427       | 0.842        | 0.6145648           | -35.11085         | -36.01121         | 0.1796235         |

| Climate trait | K         | p-value | lambda( $\lambda$ ) | logL( $\lambda$ ) | LR( $\lambda=0$ ) | p-value     |
|---------------|-----------|---------|---------------------|-------------------|-------------------|-------------|
| PCA1          | 0.0201727 | 0.024   | 0.905784            | -70.641           | 12.567            | 0.000392627 |

(b)

| <i>Bdhn</i> gene | Treatment | K               | p-value      | lambda( $\lambda$ ) | logL( $\lambda$ ) | LR( $\lambda=0$ ) | p-value           |
|------------------|-----------|-----------------|--------------|---------------------|-------------------|-------------------|-------------------|
| <i>Bdhn</i> 1aW  | W         | 0.231879        | 0.142        | 0.782475            | -175.48           | 1.121             | 0.289703          |
| <i>Bdhn</i> 2W   |           | <b>0.34558</b>  | <b>0.017</b> | <b>0.759422</b>     | <b>-112.036</b>   | <b>6.78197</b>    | <b>0.00920834</b> |
| <i>Bdhn</i> 3W   |           | 0.10957         | 0.603        | 6.64306E-05         | -93.2539          | 0.00063134        | 1                 |
| <i>Bdhn</i> 7W   |           | <b>0.433394</b> | <b>0.031</b> | <b>0.97584</b>      | <b>-60.2457</b>   | <b>3.42969</b>    | <b>0.0640339</b>  |
| <i>Bdhn</i> 1aD  | D         | 0.308794        | 0.051        | 0.502054            | -194.065          | 0.710376          | 0.399319          |
| <i>Bdhn</i> 2D   |           | 0.211919        | 0.176        | 6.64306E-05         | -208.371          | 0.00063094        | 1                 |
| <i>Bdhn</i> 3D   |           | <b>0.433425</b> | <b>0.064</b> | <b>0.951732</b>     | <b>-234.916</b>   | <b>4.48918</b>    | <b>0.0341101</b>  |
| <i>Bdhn</i> 7D   |           | 0.379302        | 0.083        | 0.917646            | -195.278          | 1.74672           | 0.18629           |

| Phenotypic trait | K                 | p-value      | lambda( $\lambda$ ) | logL( $\lambda$ ) | LR( $\lambda=0$ ) | p-value            |
|------------------|-------------------|--------------|---------------------|-------------------|-------------------|--------------------|
| leaf_rwcW        | 0.00633355        | 0.137        | 6.61E-05            | -21.1366          | -21.1361          | 1                  |
| leaf_wcW         | 0.00601205        | 0.142        | 0.712778            | -124.3118         | -124.641          | 0.4171331          |
| lmaW             | 0.0127346         | 0.067        | 0.5672695           | -53.1973          | -54.02652         | 0.1978138          |
| proW             | 0.00751385        | 0.279        | 6.61E-05            | -65.7397          | -65.73915         | 1                  |
| <b>abvrgdW</b>   | <b>0.00982265</b> | <b>0.118</b> | <b>0.9056281</b>    | <b>-143.4905</b>  | <b>-147.2048</b>  | <b>0.006419007</b> |
| blwgrdW          | 0.00503958        | 0.192        | 0.372553            | -117.8161         | -117.602          | 1                  |
| ttlmassW         | 0.00760606        | 0.15         | 0.8313881           | -153.3088         | -155.4348         | 0.0392068          |
| <b>rmrW</b>      | <b>0.0198041</b>  | <b>0.031</b> | <b>0.8500612</b>    | <b>-65.57032</b>  | <b>-69.23347</b>  | <b>0.006795293</b> |
| WUE_W            | 0.00079528        | 0.921        | 6.61E-05            | -9.565582         | -9.565045         | 1                  |
| leafcW           | 0.00344133        | 0.413        | 6.61E-05            | -84.79111         | -84.79067         | 1                  |
| <b>leafnW</b>    | <b>0.00111356</b> | <b>0.809</b> | <b>0.6412875</b>    | <b>-71.1111</b>   | <b>-72.40537</b>  | <b>0.1076397</b>   |
| <b>cnW</b>       | <b>0.00101427</b> | <b>0.842</b> | <b>6.15E-01</b>     | <b>-35.11085</b>  | <b>-36.01121</b>  | <b>0.1796235</b>   |
| <b>leaf_rwcD</b> | <b>0.00595303</b> | <b>0.202</b> | <b>0.8240433</b>    | <b>-70.83287</b>  | <b>-71.94764</b>  | <b>0.1353942</b>   |
| leaf_wcD         | 0.0191719         | 0.029        | 0.5318181           | -129.0792         | -129.2025         | 0.6194317          |
| lmaD             | 0.00655413        | 0.198        | 0.4014225           | -60.3207          | -60.04825         | 1                  |
| proD             | 0.00178069        | 0.645        | 6.61E-05            | -118.2053         | -118.2048         | 1                  |
| <b>abvrgdD</b>   | <b>0.0548587</b>  | <b>0.005</b> | <b>0.9862024</b>    | <b>-132.3802</b>  | <b>-137.5324</b>  | <b>0.001327115</b> |
| blwgrdD          | 0.00799846        | 0.135        | 0.6778591           | -112.6454         | -113.232          | 0.2787568          |
| ttlmassD         | 0.0254584         | 0.02         | 0.9586421           | -144.0437         | -147.1176         | 0.01315614         |
| rmrD             | 0.0117638         | 0.1          | 0.8587116           | -71.60054         | -74.00027         | 0.02846858         |
| WUE_D            | 0.0206935         | 0.023        | 0.5455282           | -9.438273         | -9.102205         | 1                  |

|        |            |       |           |           |           |             |
|--------|------------|-------|-----------|-----------|-----------|-------------|
| leafcD | 0.00564166 | 0.206 | 6.61E-05  | -86.81046 | -86.80988 | 1           |
| leafnD | 0.0127895  | 0.066 | 0.8379002 | -52.22653 | -57.04403 | 0.001909058 |
| cnD    | 0.015233   | 0.051 | 0.8350859 | -24.49639 | -28.06983 | 0.007509447 |

| Climate trait | K        | p-value | lambda( $\lambda$ ) | logL( $\lambda$ ) | LR( $\lambda=0$ ) | p-value    |
|---------------|----------|---------|---------------------|-------------------|-------------------|------------|
| PCA1          | 0.462712 | 0.005   | 0.753963            | -72.2802          | 9.38246           | 0.00219071 |

Figure S1

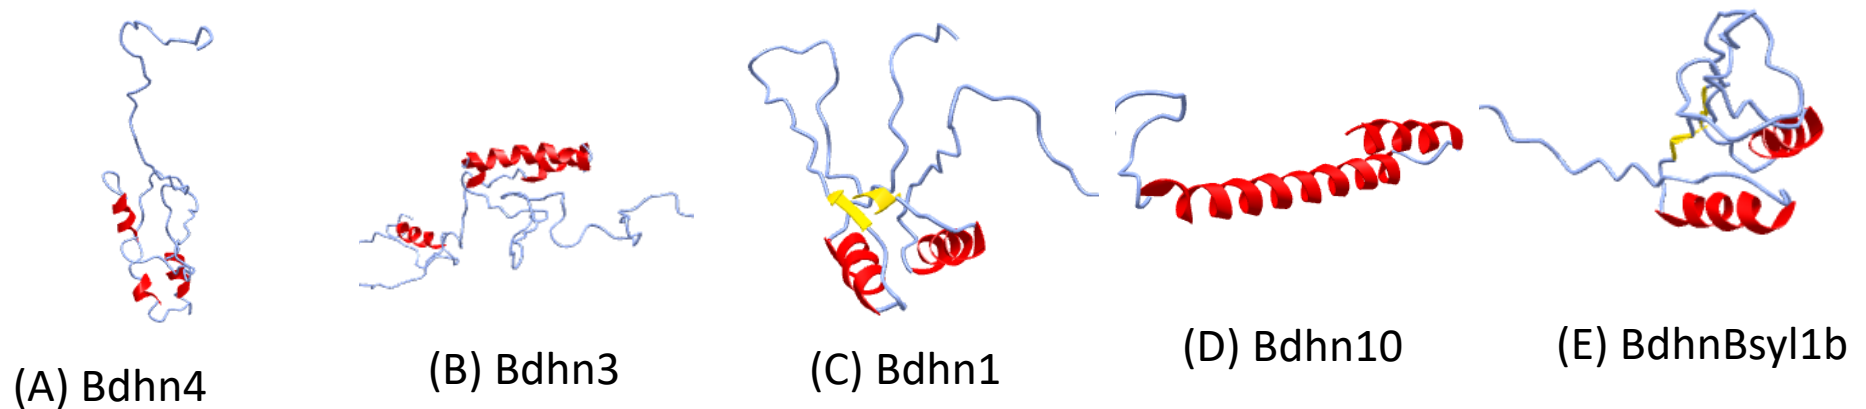

Complete sets of 3D structures for all *Brachypodium* species and proteins are available in the following links:

**Brachypodium distachyon:** <http://zeta.uma.es/public/journal/brachy/raptorx/distachyon.html>

**Brachypodium hybridum D:** <http://zeta.uma.es/public/journal/brachy/raptorx/hybridumD.html>

**Brachypodium stacei:** <http://zeta.uma.es/public/journal/brachy/raptorx/stacei.html>

**Brachypodium hybridum S:** <http://zeta.uma.es/public/journal/brachy/raptorx/hybridumS.html>

**Brachypodium sylvaticum:** <http://zeta.uma.es/public/journal/brachy/raptorx/sylvaticum.html>

Figure S2

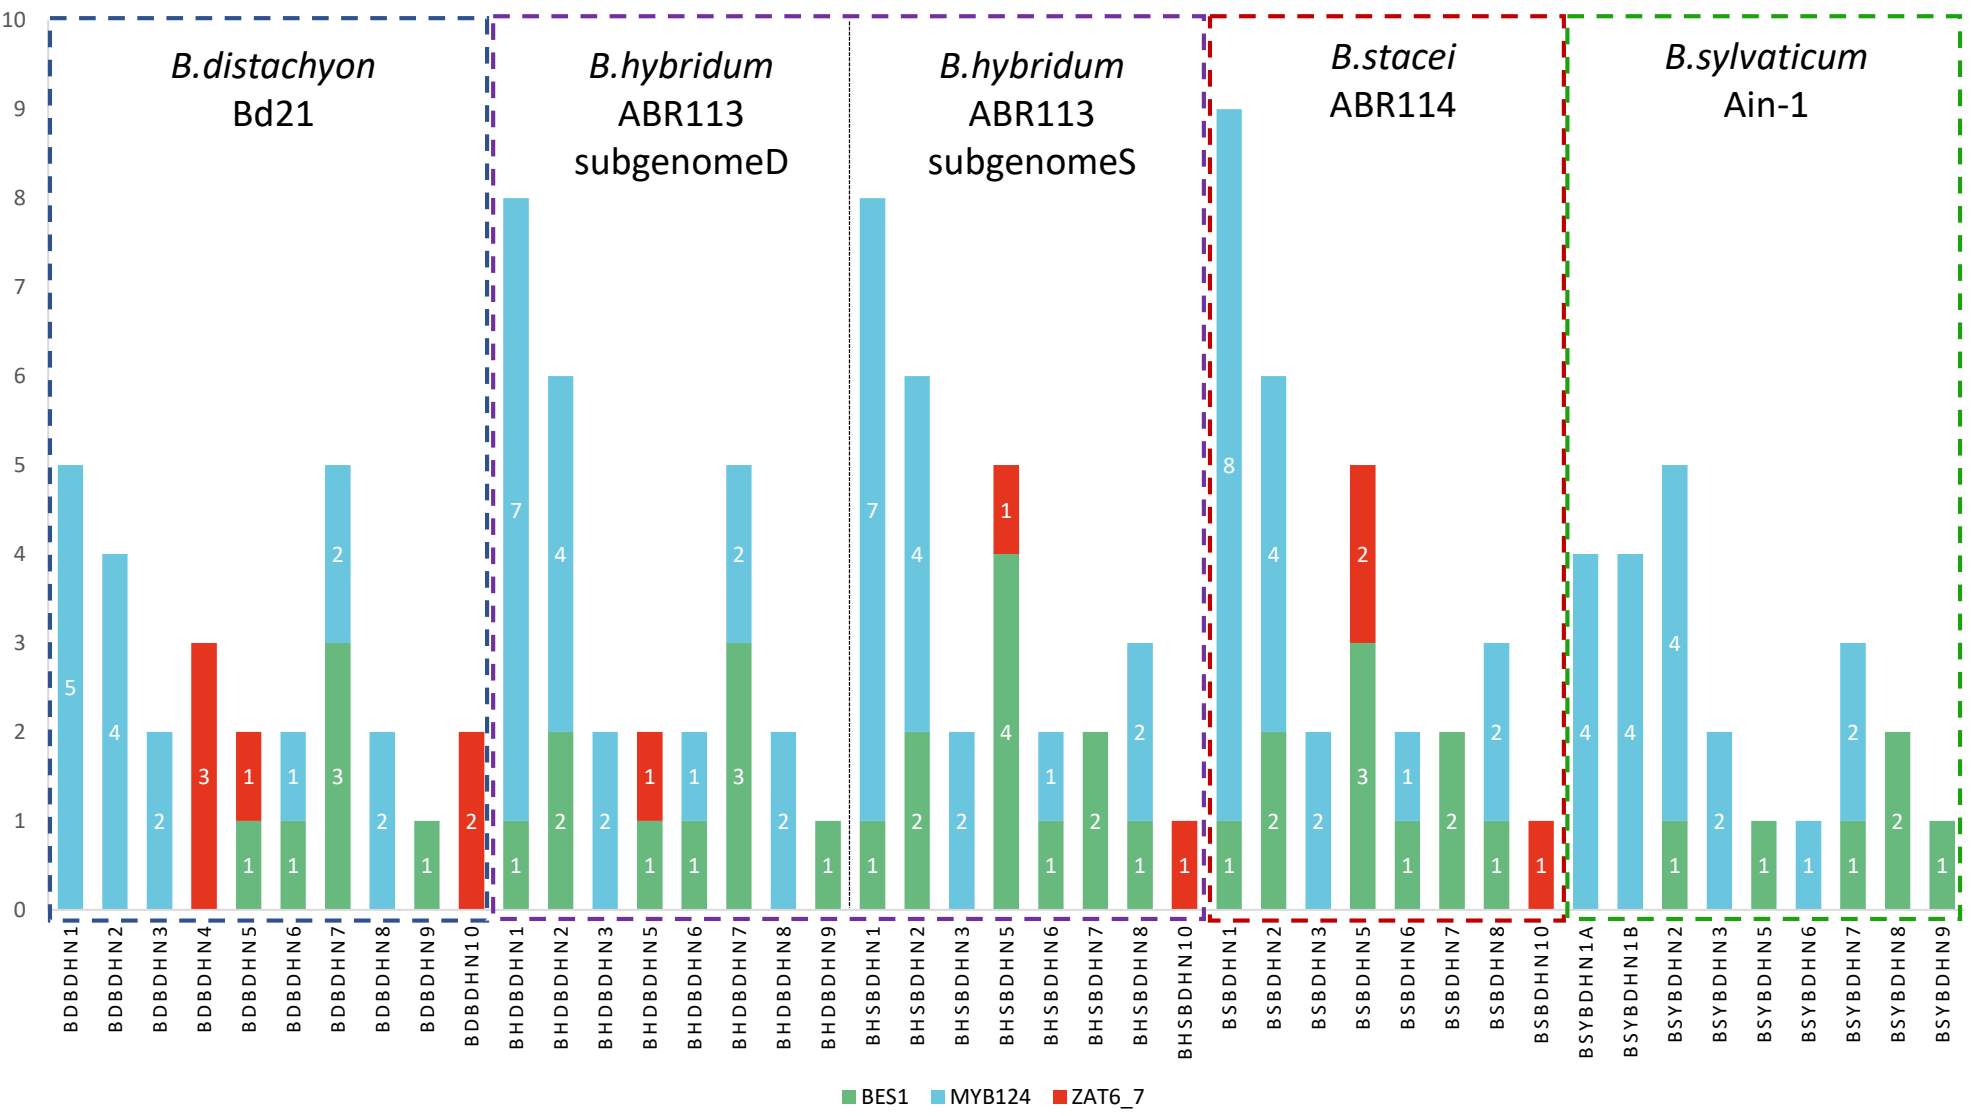

Figure S2 (b)

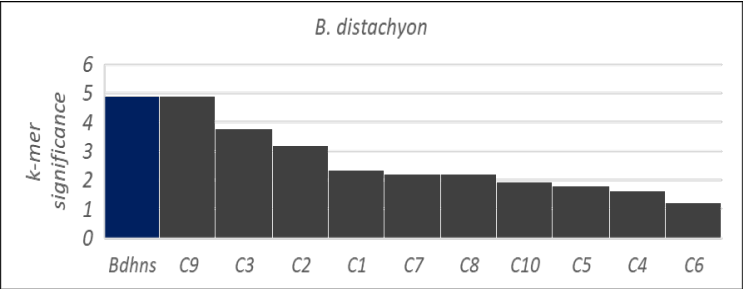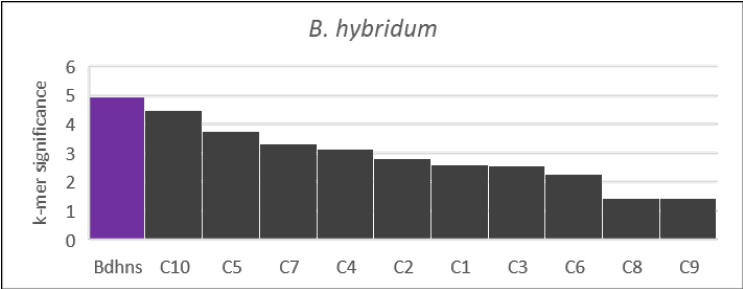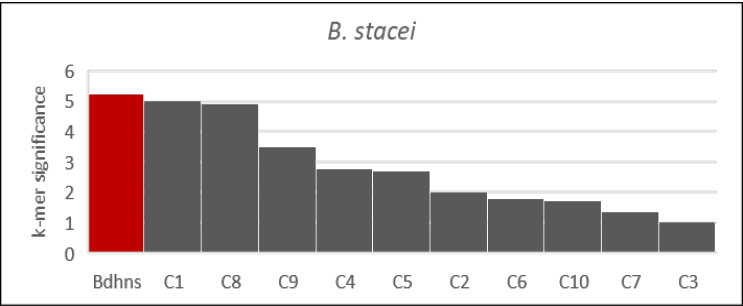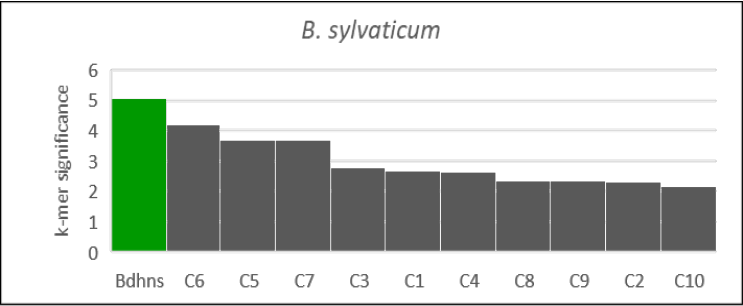

(c)

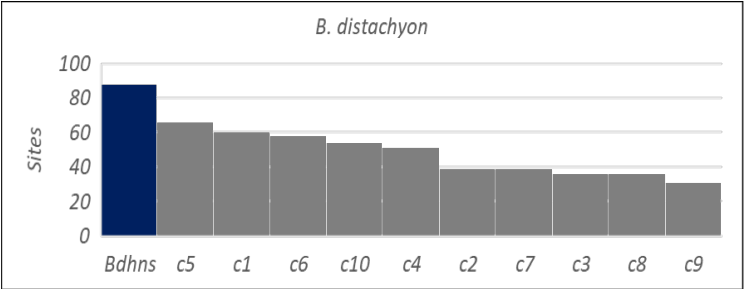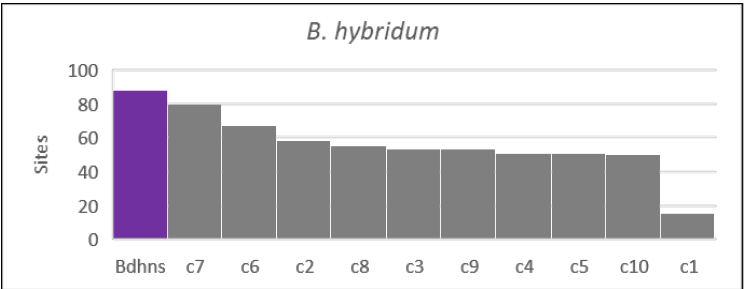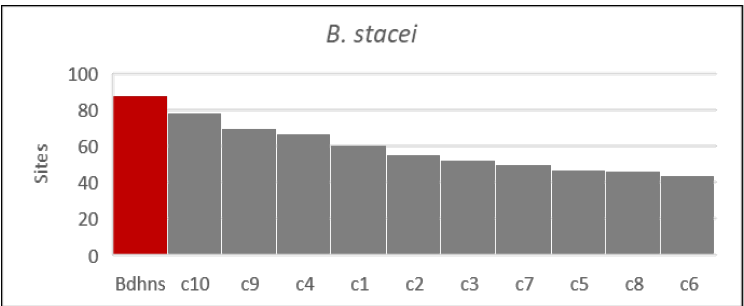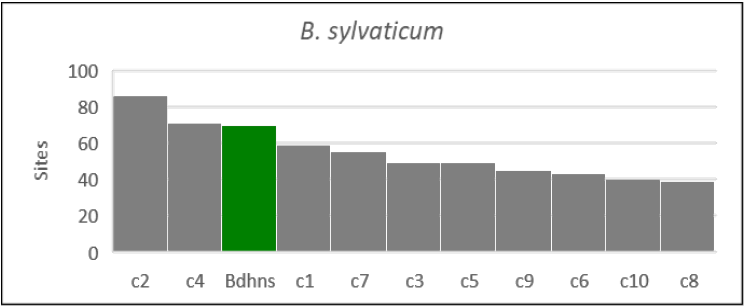

Figure S3

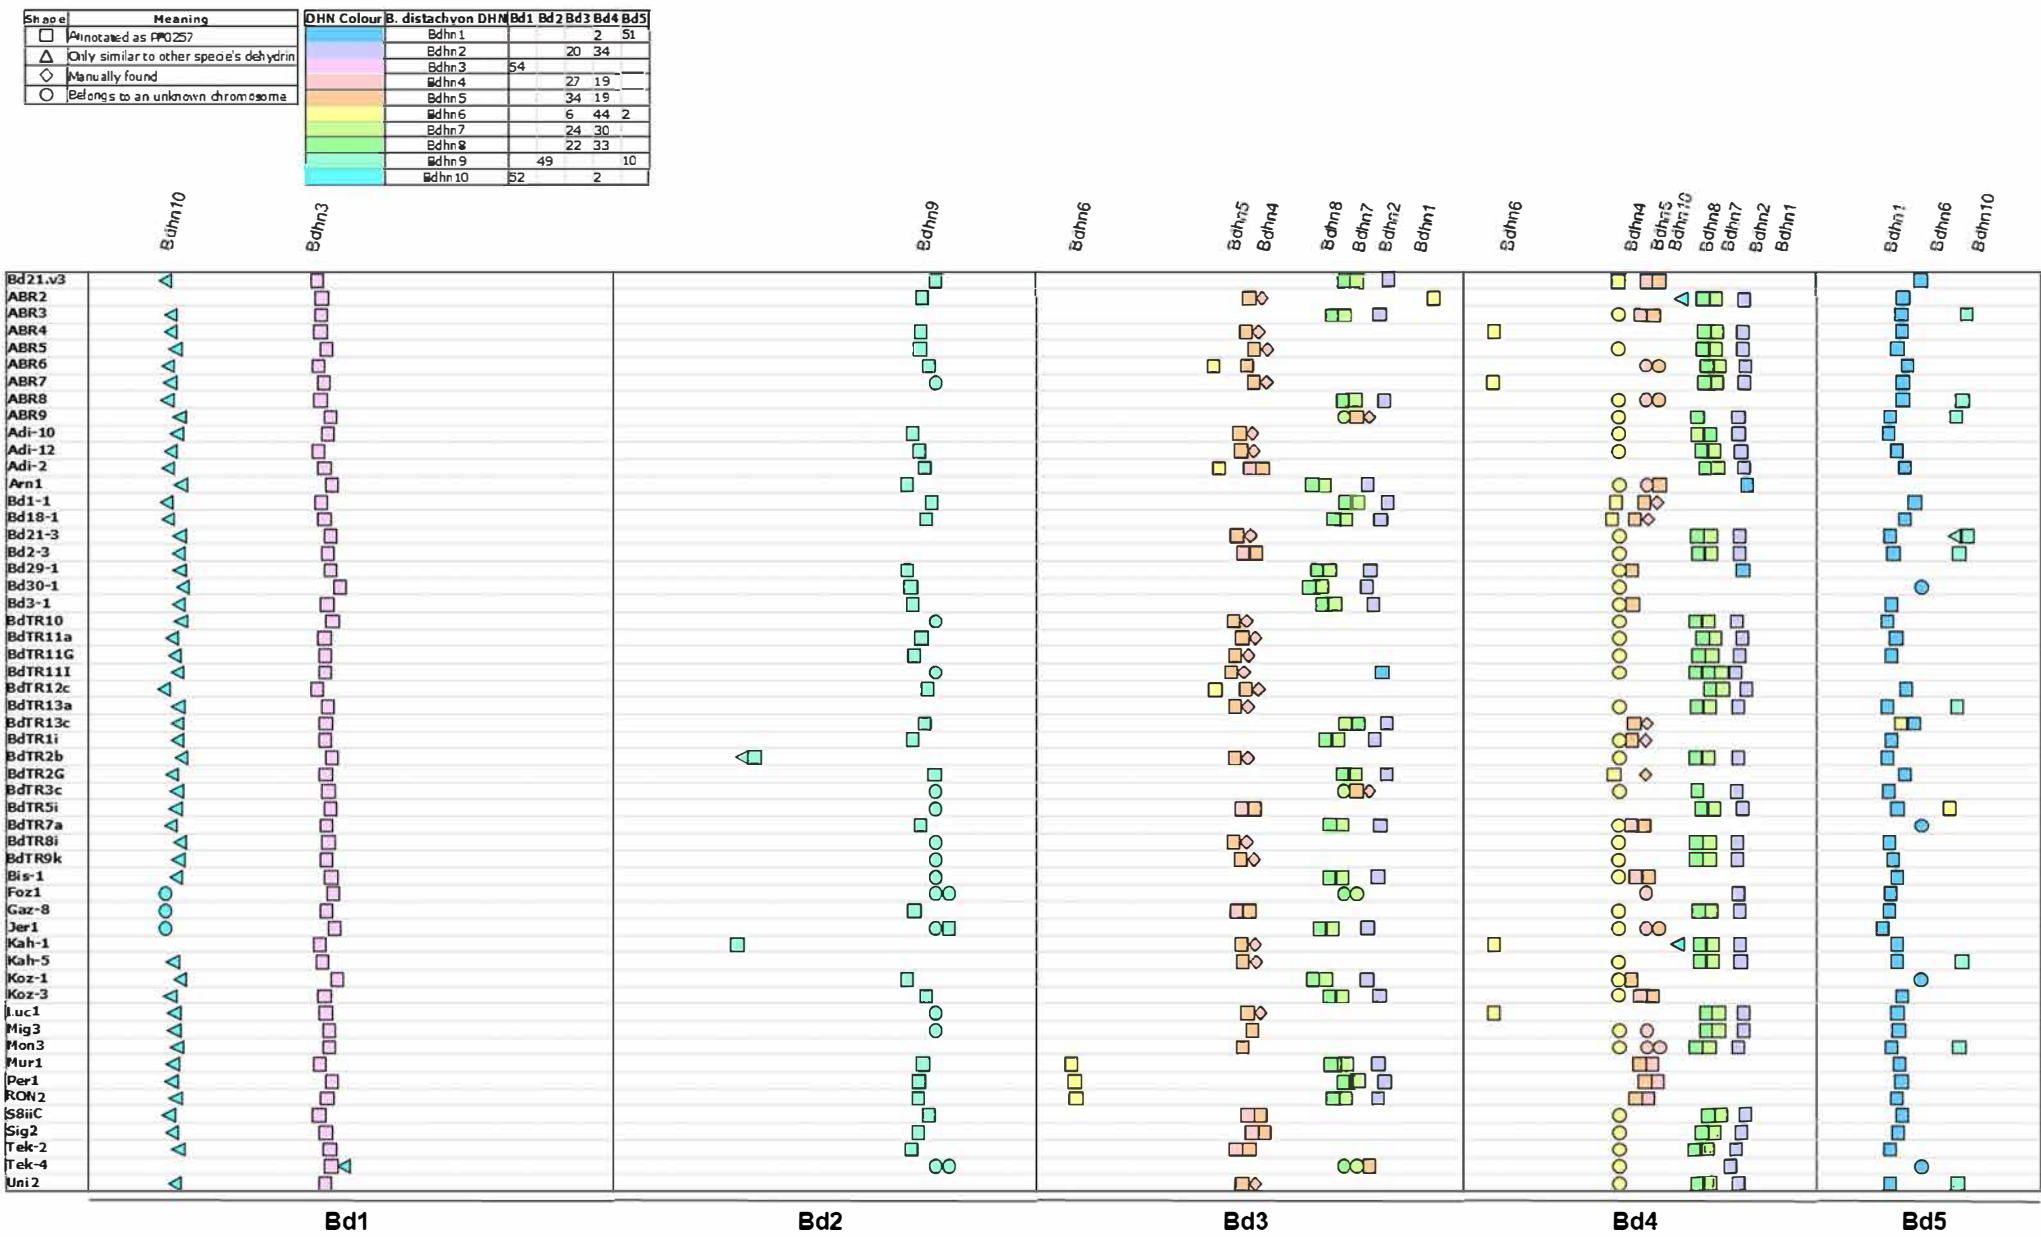

Bdhn10

Bdhn3

Bdhn9

Bdhn6

Bdhn5

Bdhn4

Bdhn8

Bdhn7

Bdhn2

Bdhn1

Bdhn6

Bdhn4

Bdhn5

Bdhn10

Bdhn8

Bdhn7

Bdhn2

Bdhn1

Bdhn1

Bdhn6

Bdhn10

Bd21.v3

ABR2

ABR3

ABR4

ABR5

ABR6

ABR7

ABR8

ABR9

Adi-10

Adi-12

Adi-2

Arn1

Bd1-1

Bd18-1

Bd21-3

Bd2-3

Bd29-1

Bd30-1

Bd3-1

BdTR10

BdTR11a

BdTR11G

BdTR11I

BdTR12c

BdTR13a

BdTR13c

BdTR1i

BdTR2b

BdTR2G

BdTR3c

BdTR5i

BdTR7a

BdTR8i

BdTR9k

Bis-1

Foz1

Gaz-8

Jer1

Kah-1

Kah-5

Koz-1

Koz-3

Luc1

Mig3

Mon3

Mur1

Per1

RON2

S8uC

Sig2

Tek-2

Tek-4

Uni2

Bd1

Bd2

Bd3

Bd4

Bd5

Figure S4

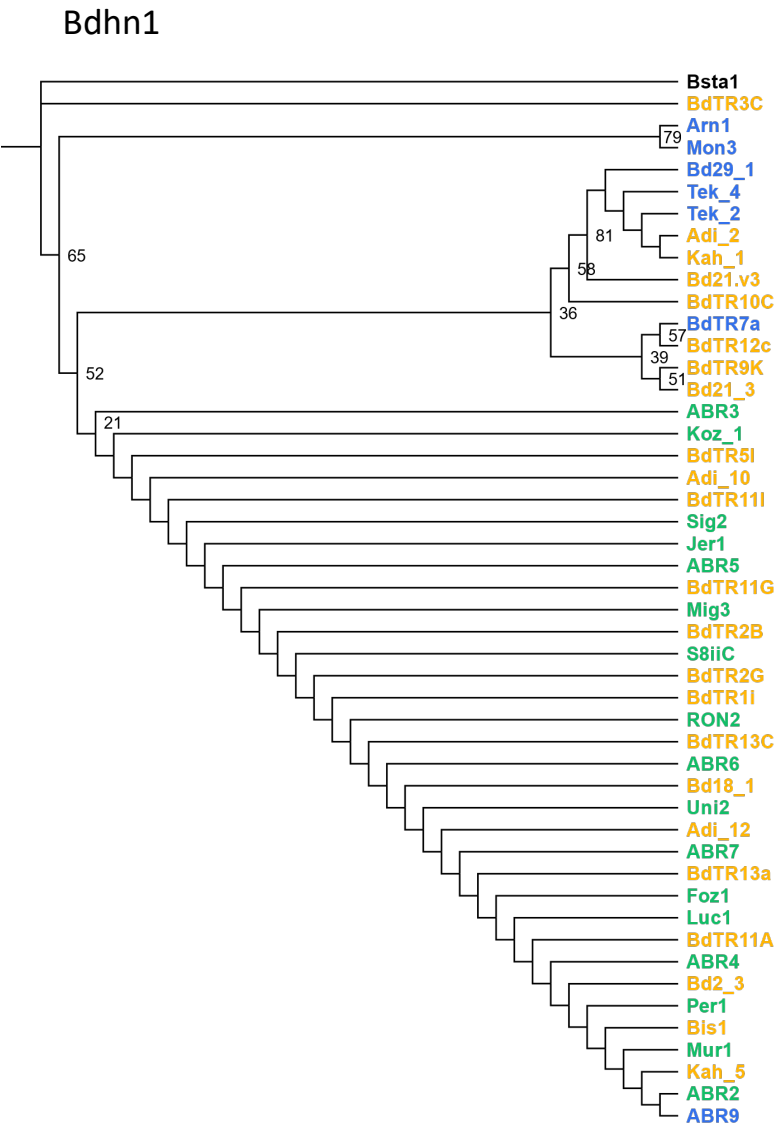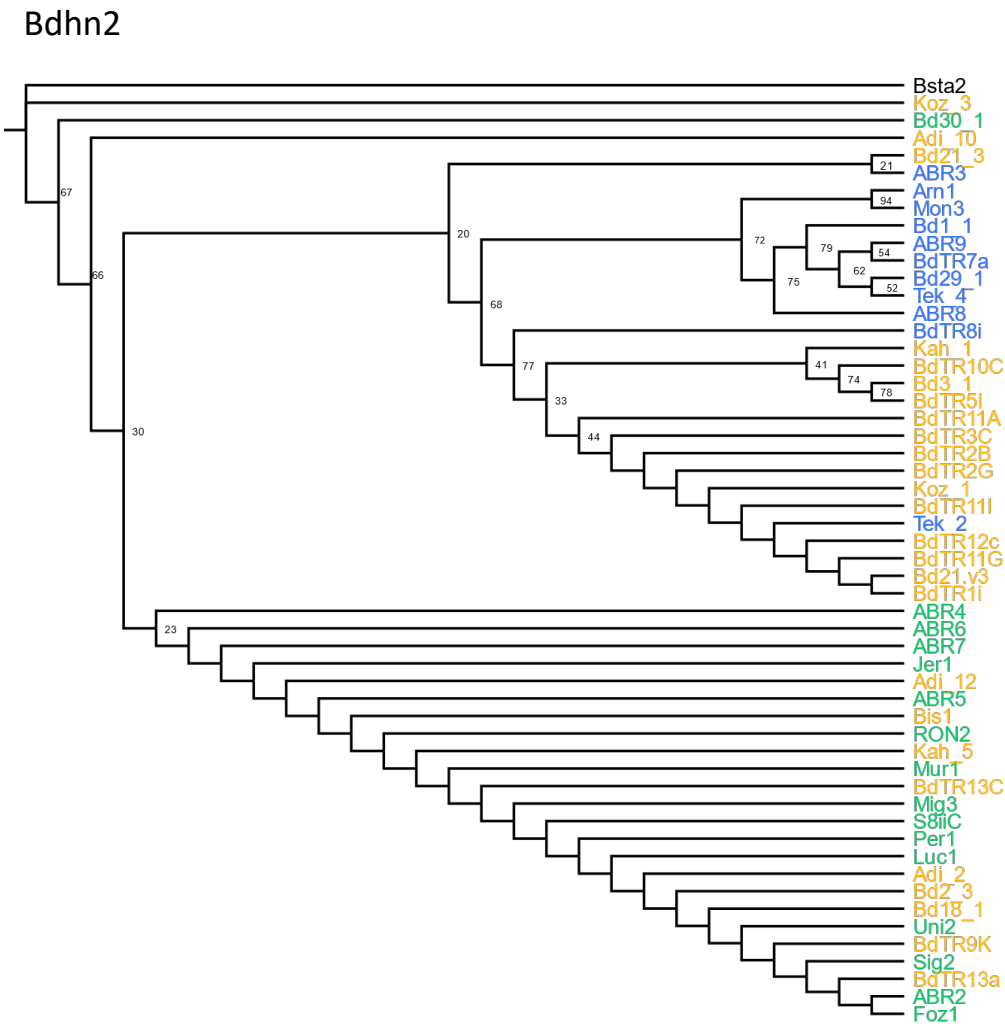



Figure S4

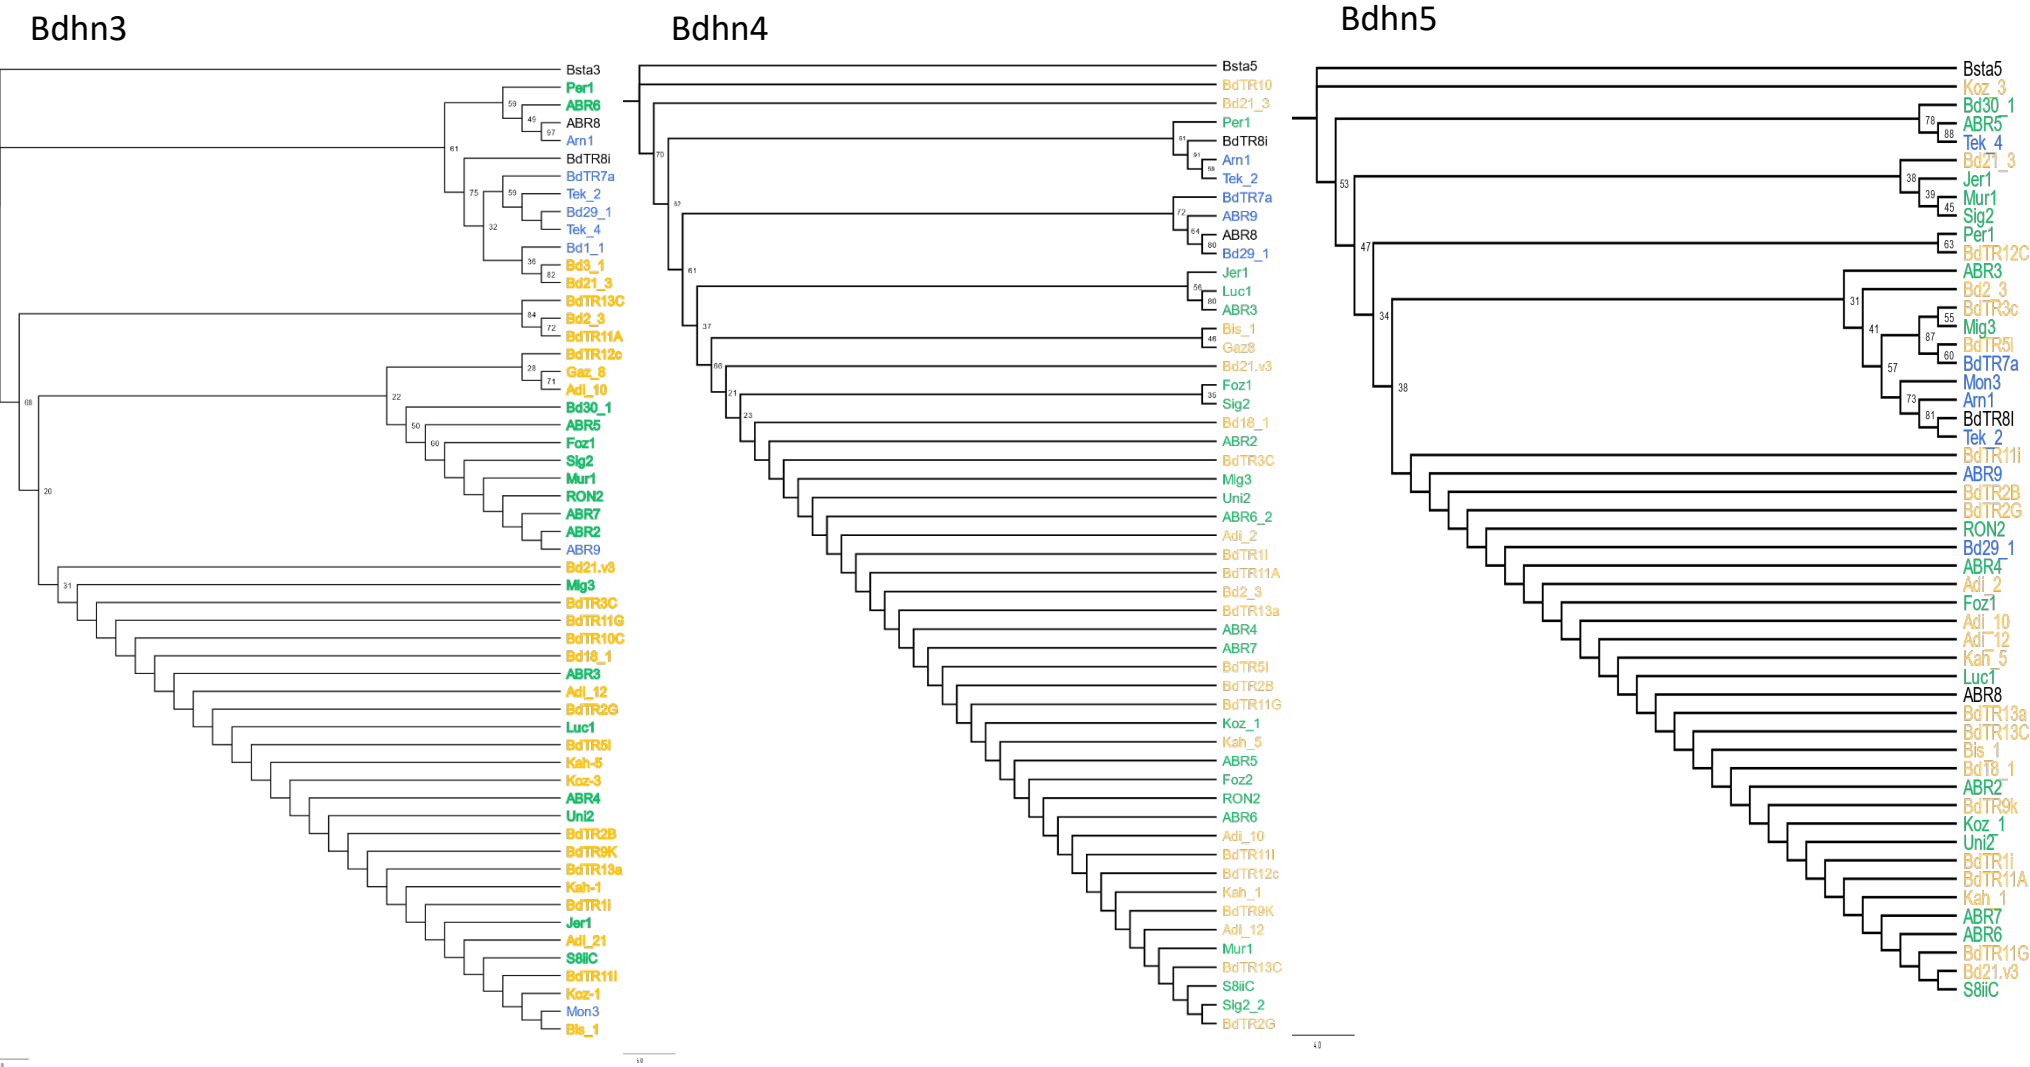

### Figure S4

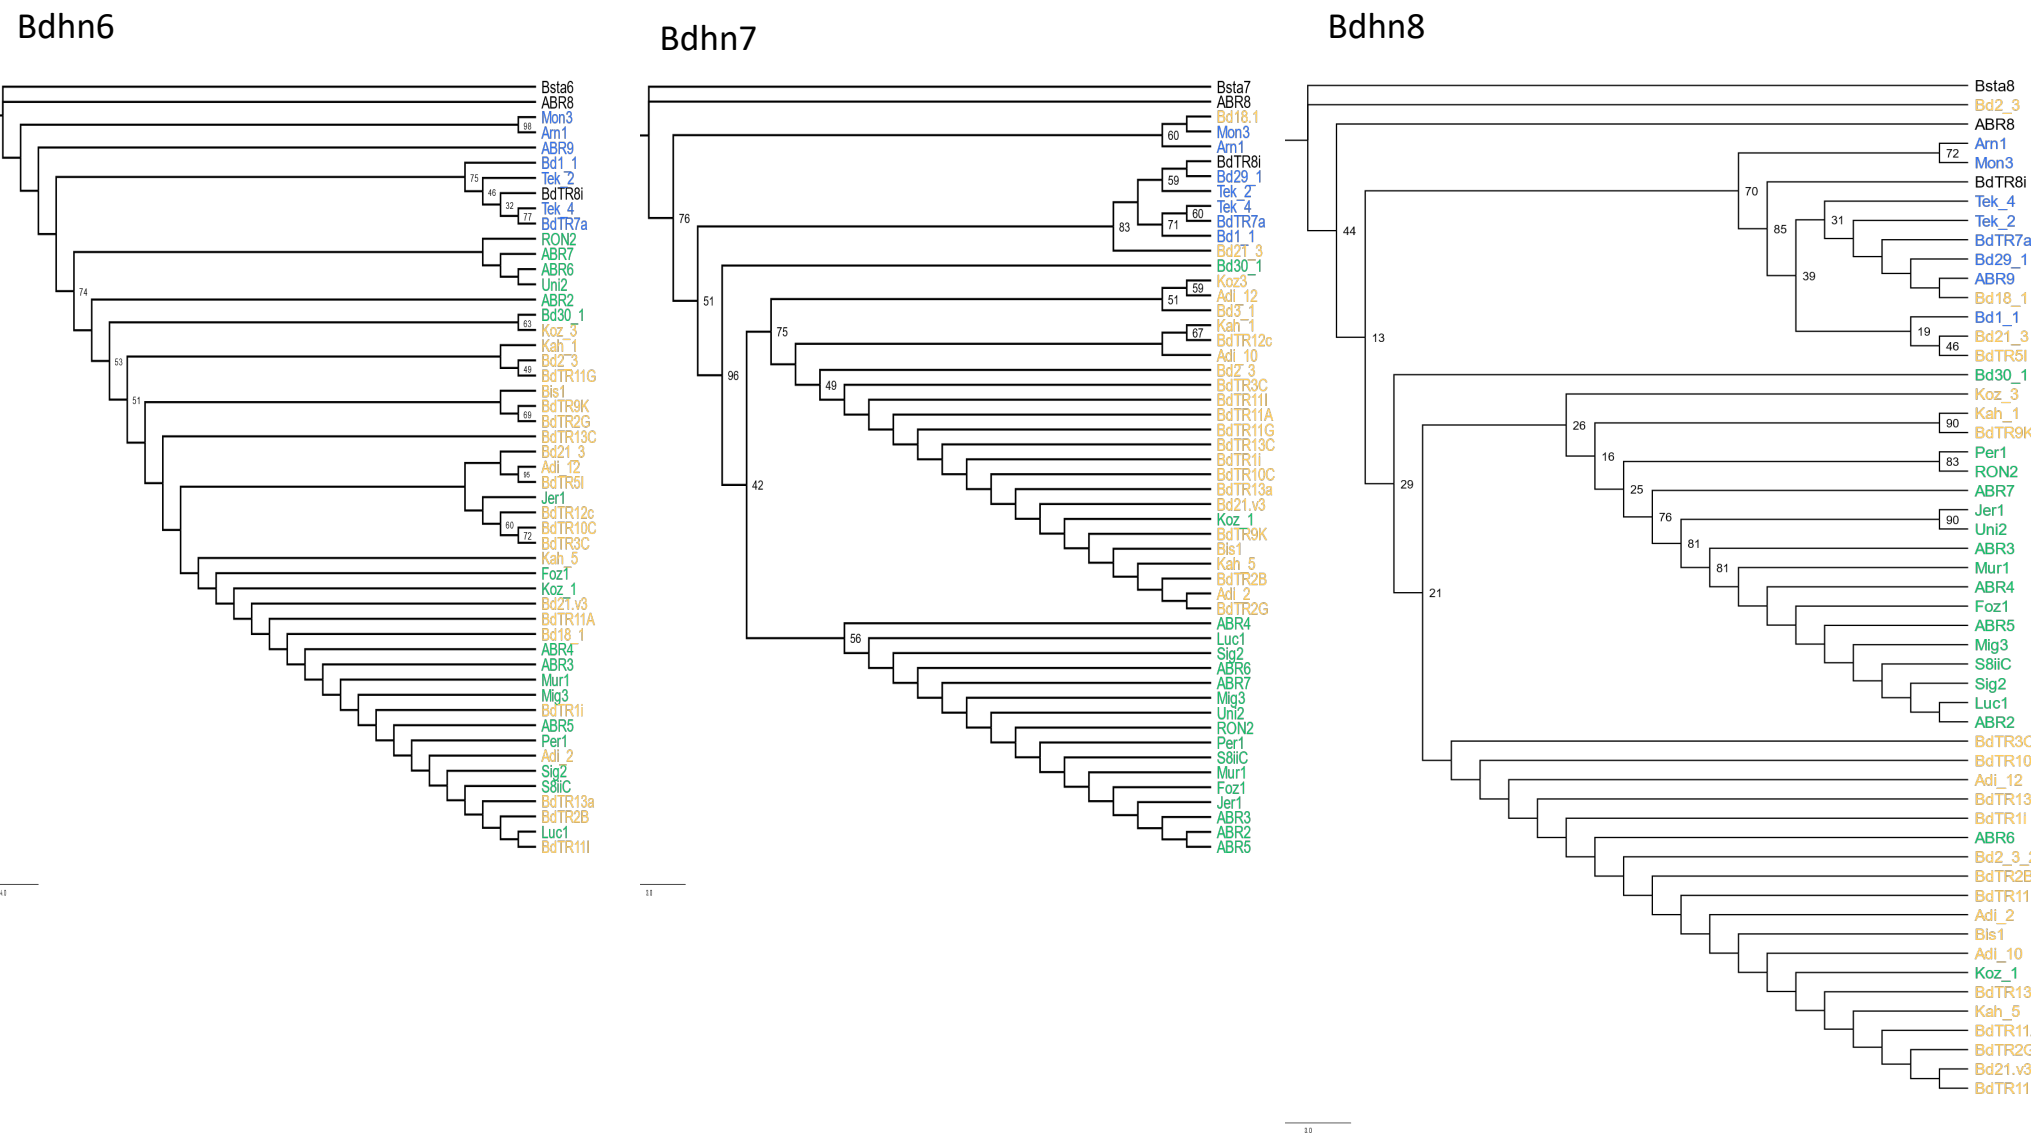

Figure S4

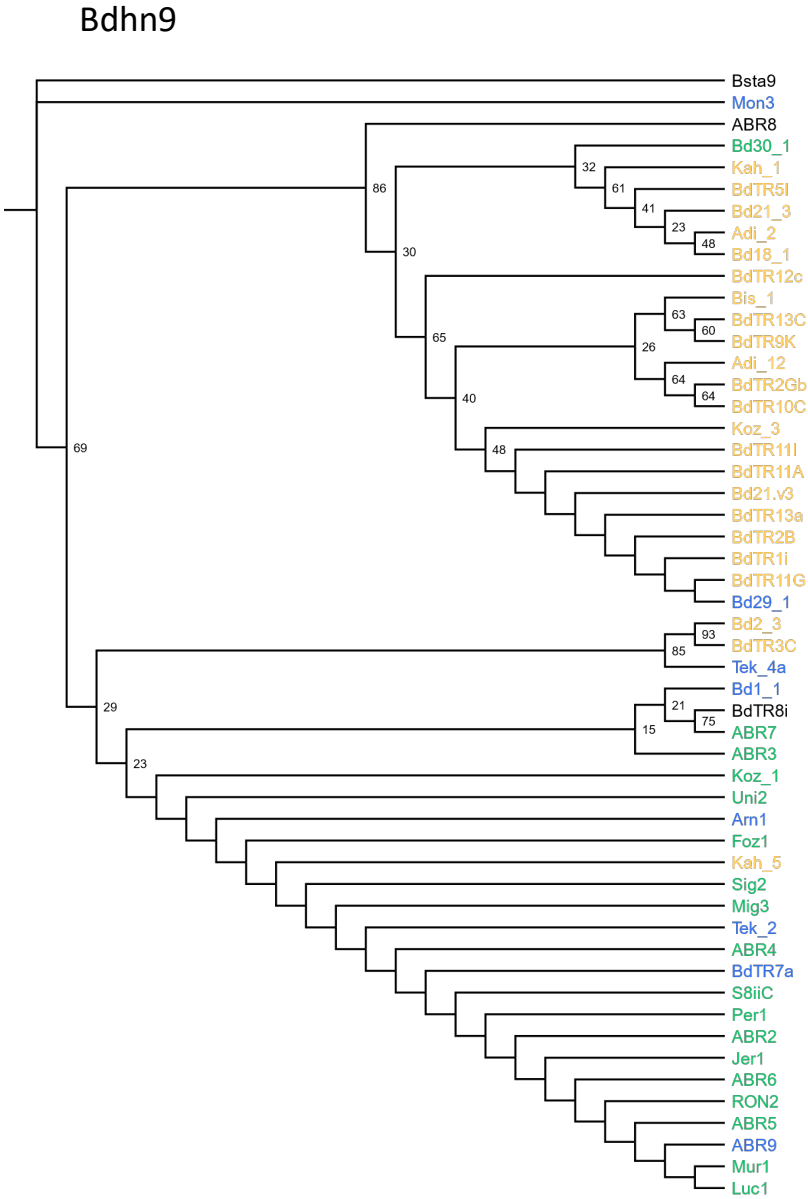

**Bdhn10**

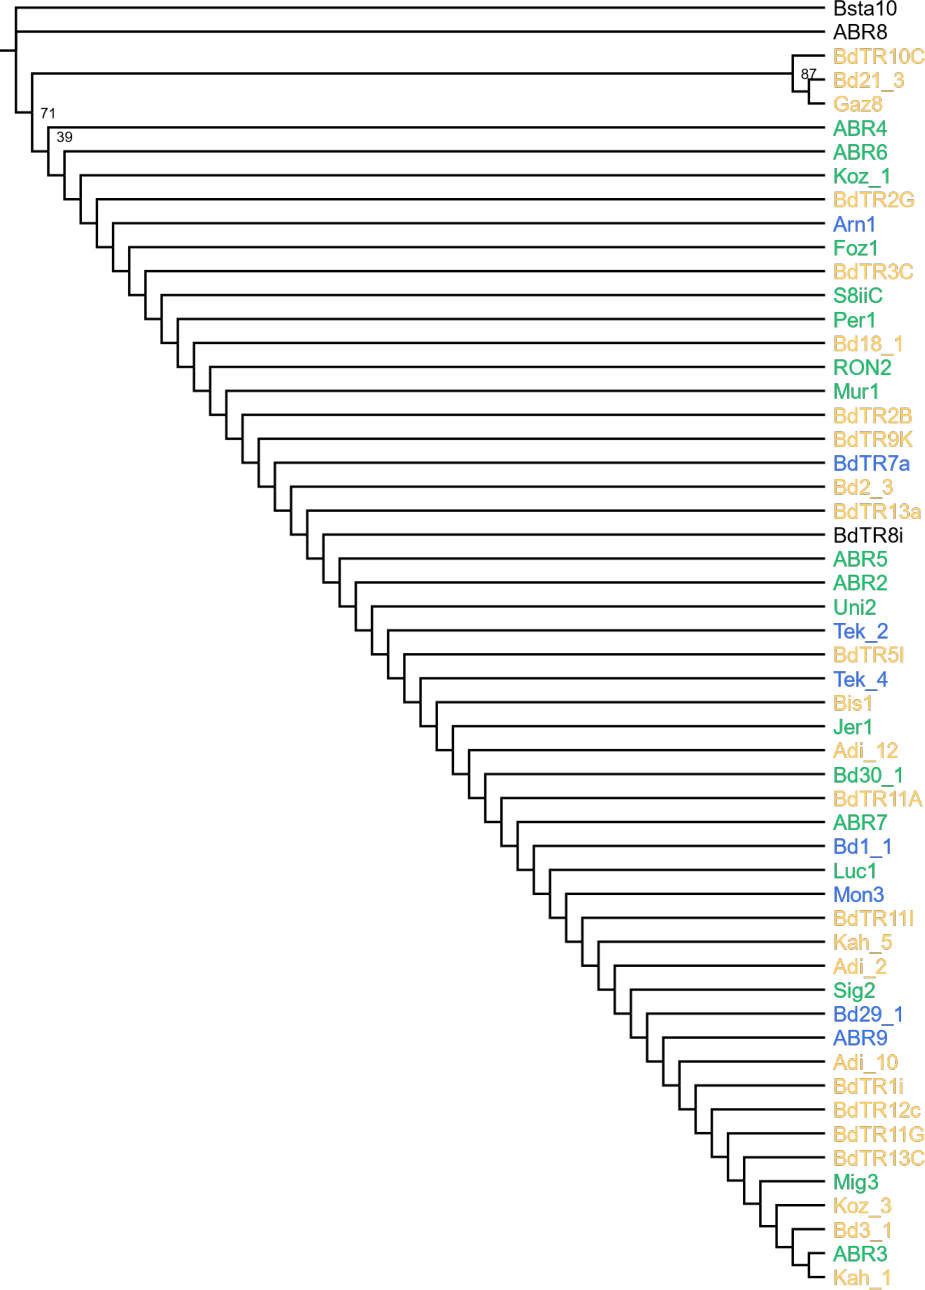

Figure S5

| #  | Ecotypes    | PCA1        |
|----|-------------|-------------|
| 1  | ABR2        | 2.579269    |
| 2  | ABR3        | 4.86108471  |
| 3  | ABR4        | 5.69006454  |
| 4  | ABR5        | 5.39529274  |
| 5  | ABR6        | 3.40042965  |
| 6  | ABR8        | 2.17586982  |
| 7  | Adi10       | -1.75668741 |
| 8  | Adi12       | -1.75668741 |
| 9  | Adi2        | -1.75668741 |
| 10 | Bd1-1       | -0.5973436  |
| 11 | Bd18-1      | 0.73085546  |
| 12 | Bd2-3       | -5.71768222 |
| 13 | Bd21-3      | -3.51663046 |
| 14 | Bd21control | -3.51663046 |
| 15 | Bd3-1       | -3.51663046 |
| 16 | Bd30-1      | -0.45762855 |
| 17 | BdTR10c     | 0.88782452  |
| 18 | BdTR11g     | 1.03334719  |
| 19 | BdTR11i     | 0.04350879  |
| 20 | BdTR1i      | -0.28516673 |
| 21 | BdTR2b      | 1.56035254  |
| 22 | BdTR2g      | 2.60379124  |
| 23 | BdTR5i      | 2.60379124  |
| 24 | BdTR9k      | 1.12002182  |
| 25 | Bis1        | -3.66257669 |
| 26 | Kah1        | -3.54231265 |
| 27 | Kah5        | -3.54231265 |
| 28 | Koz1        | -3.2693441  |
| 29 | Koz3        | -3.2693441  |
| 30 | RON2        | 5.47816162  |

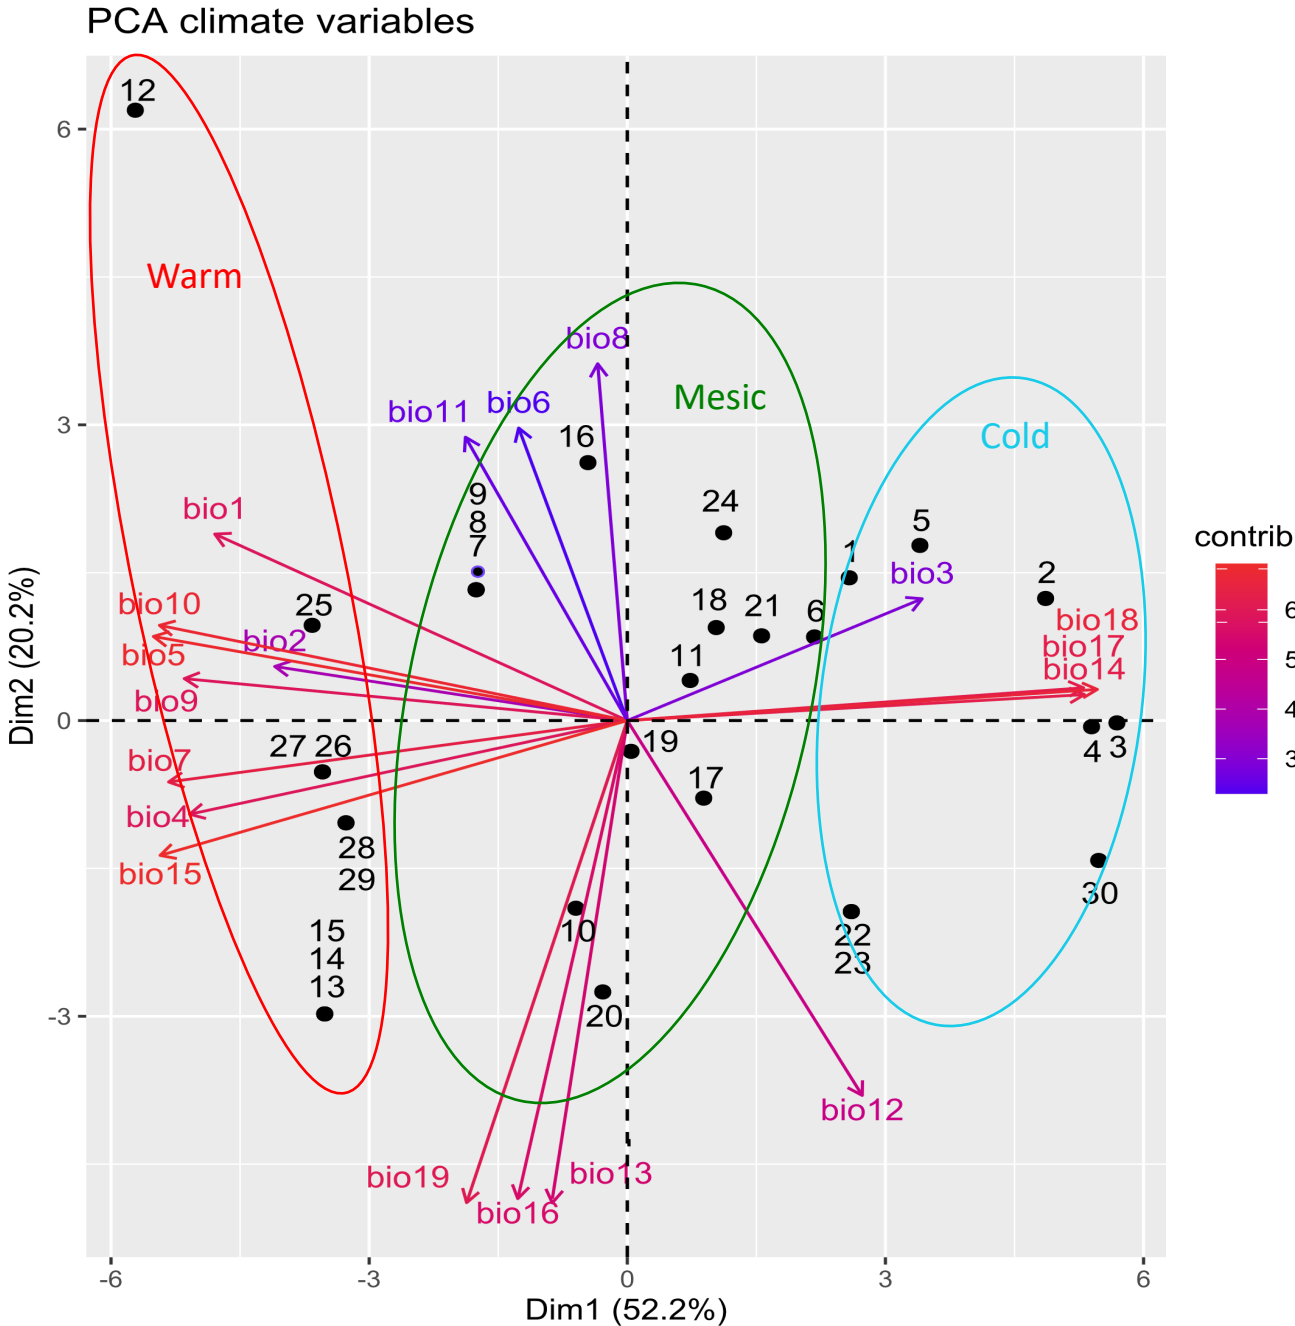

Figure S6

(a)

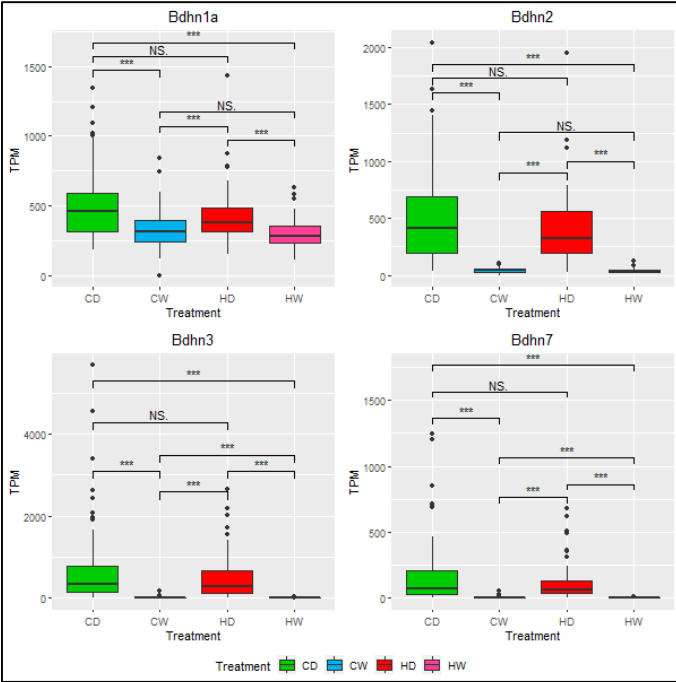

(b)

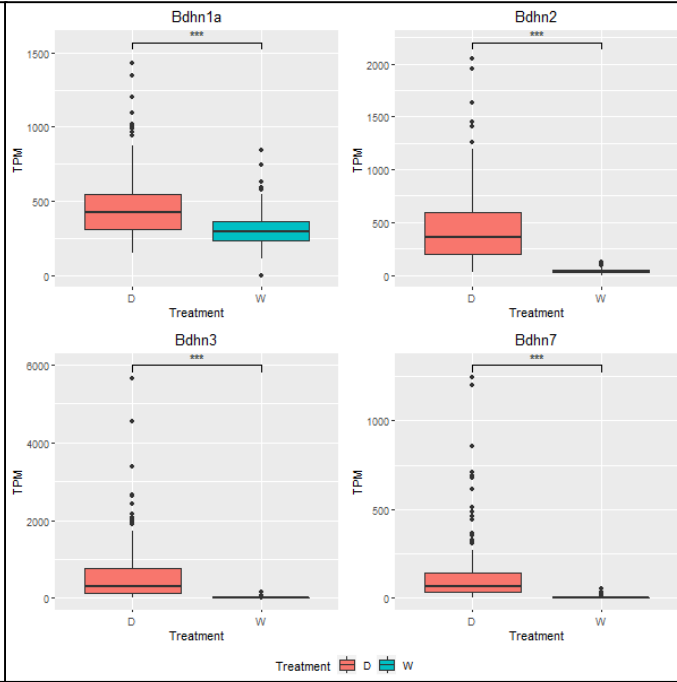

(c)

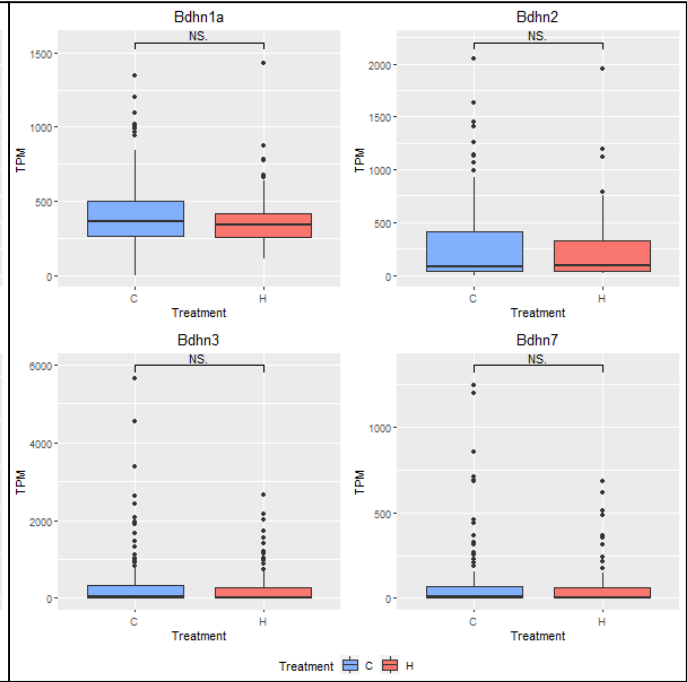

Figure S7

Bdhn1a D

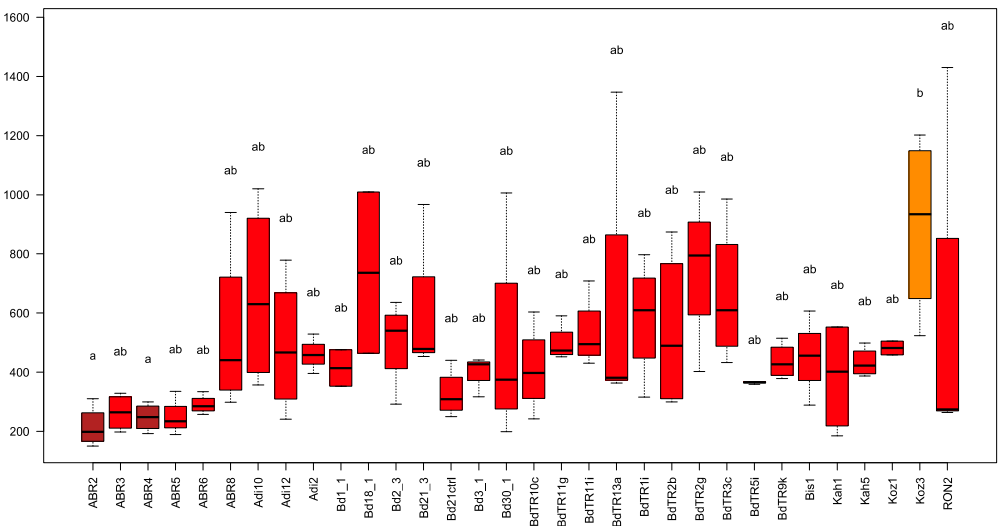

Bdhn2 D

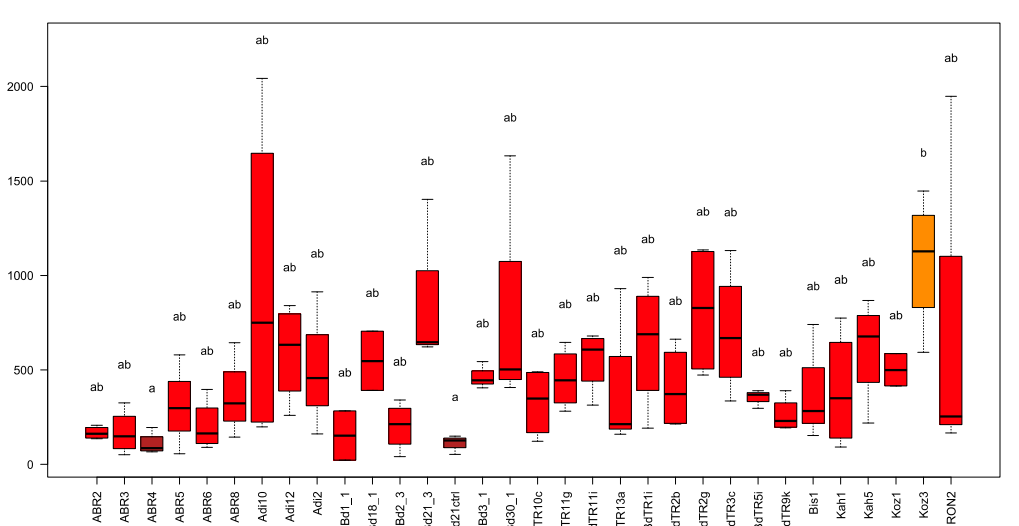

Bdhn1a W

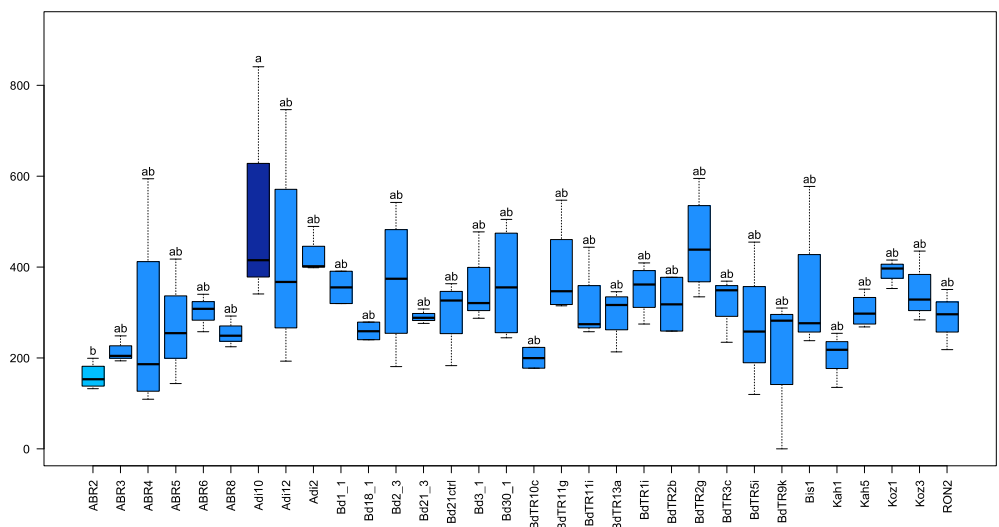

Bdhn2W

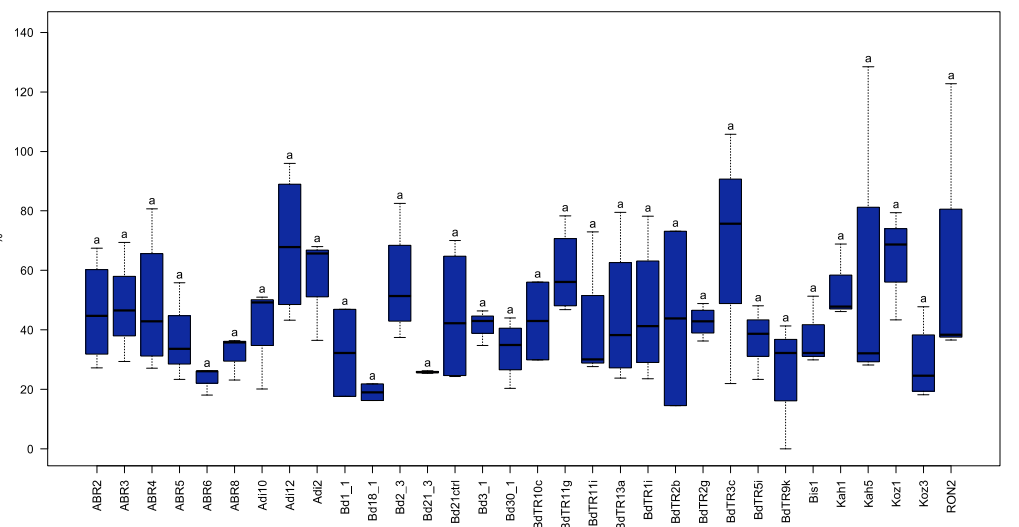

Figure S7

Bdhn3 D

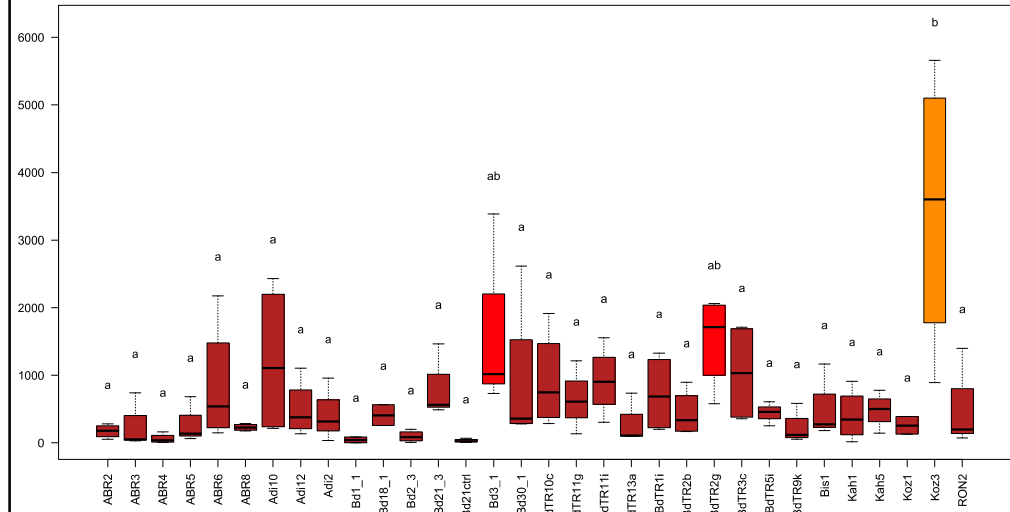

Bdhn7 D

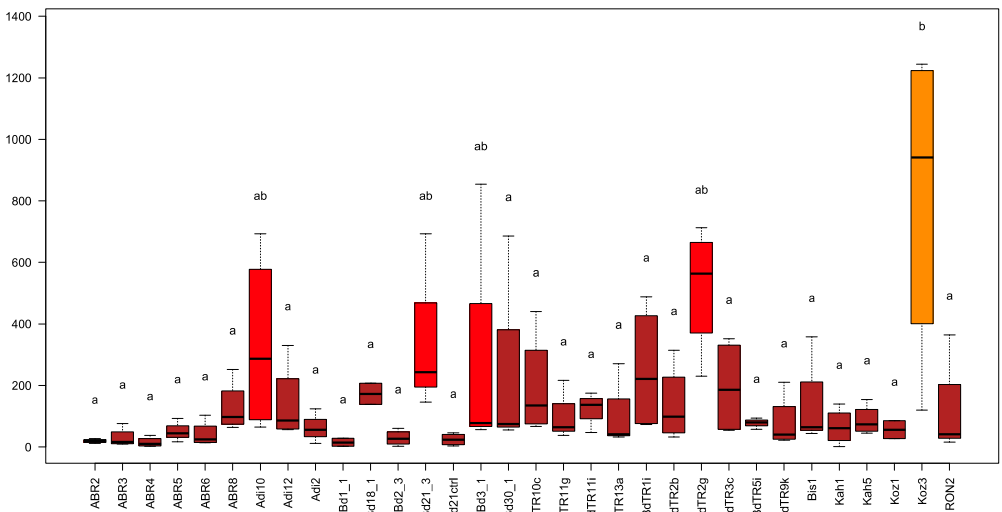

Bdhn3 W

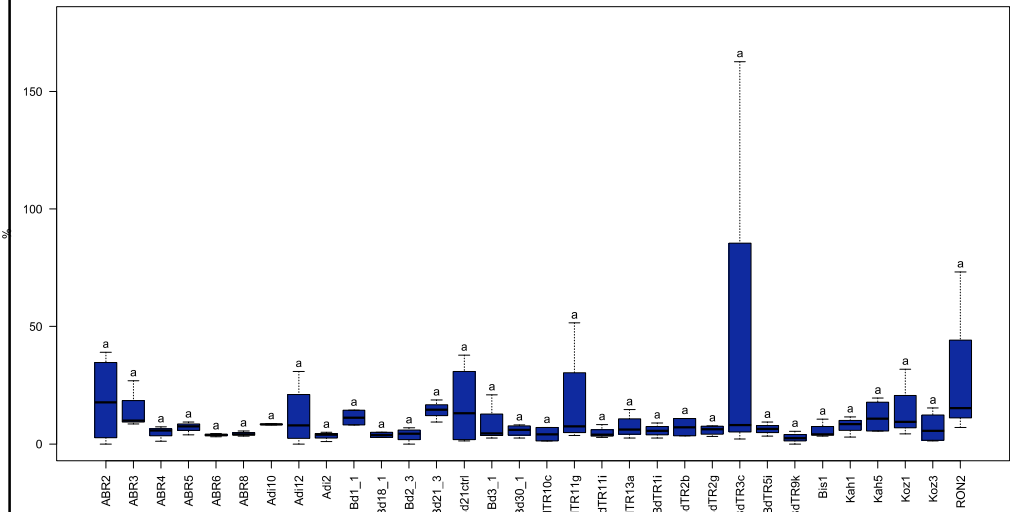

Bdhn7 W

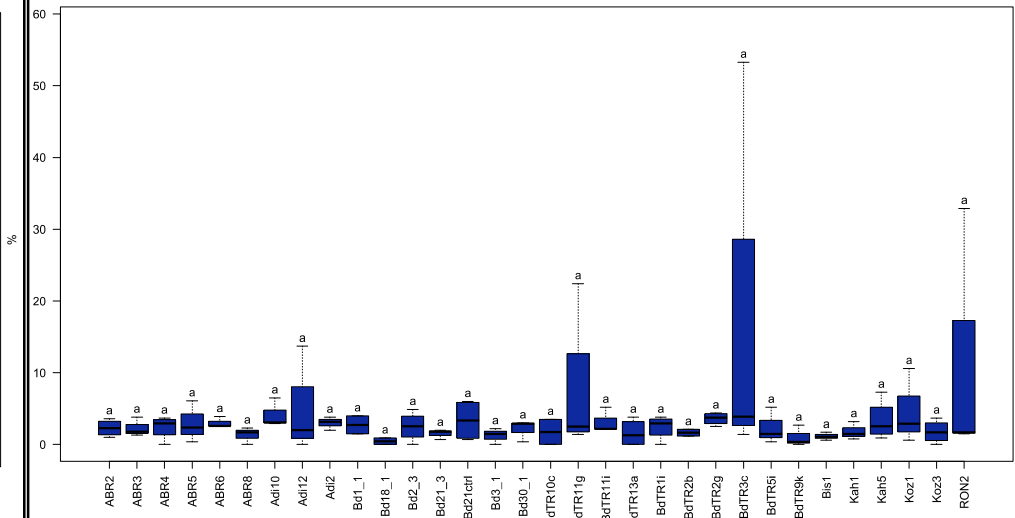

Figure S8

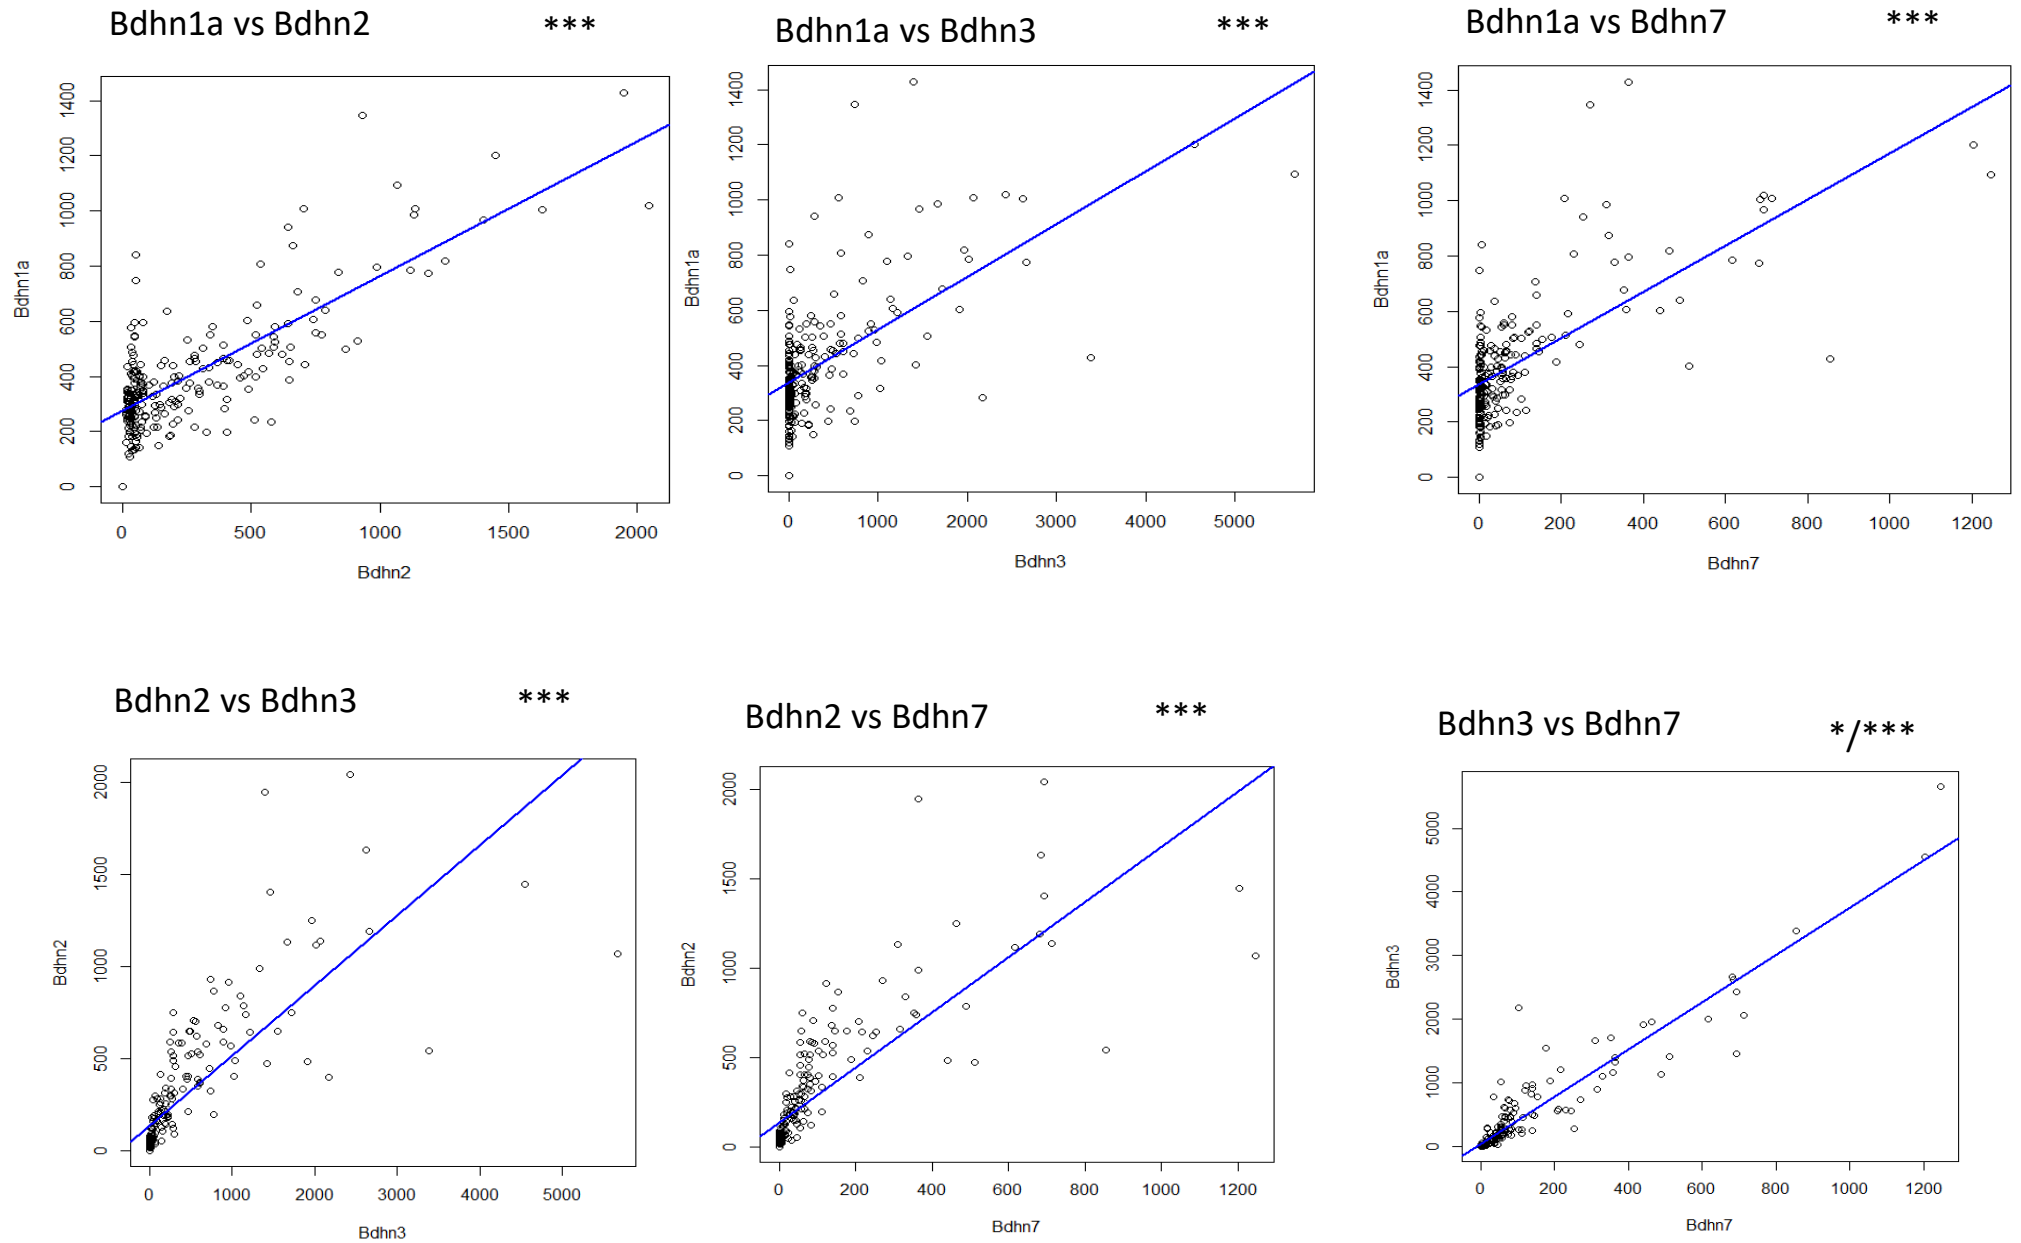



Figure S9

*Triticum aestivum*

*Brachypodium distachyon*

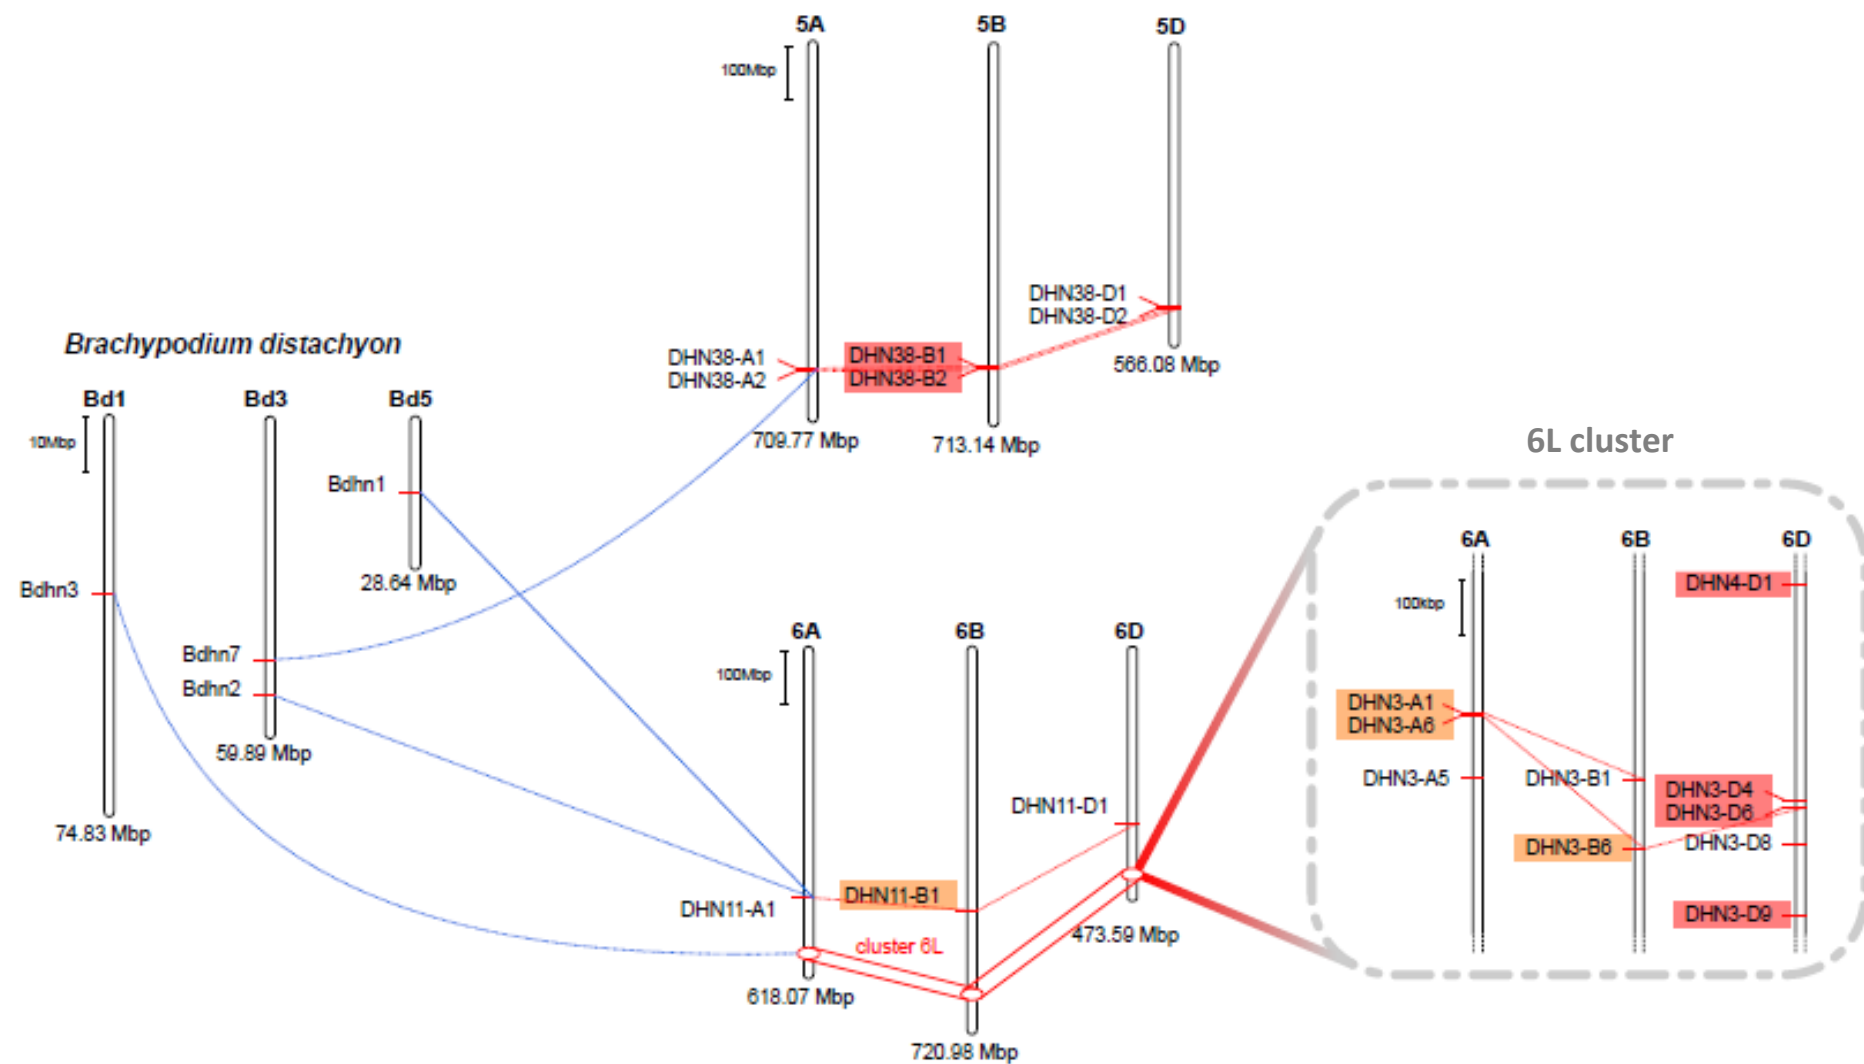

Figure S10

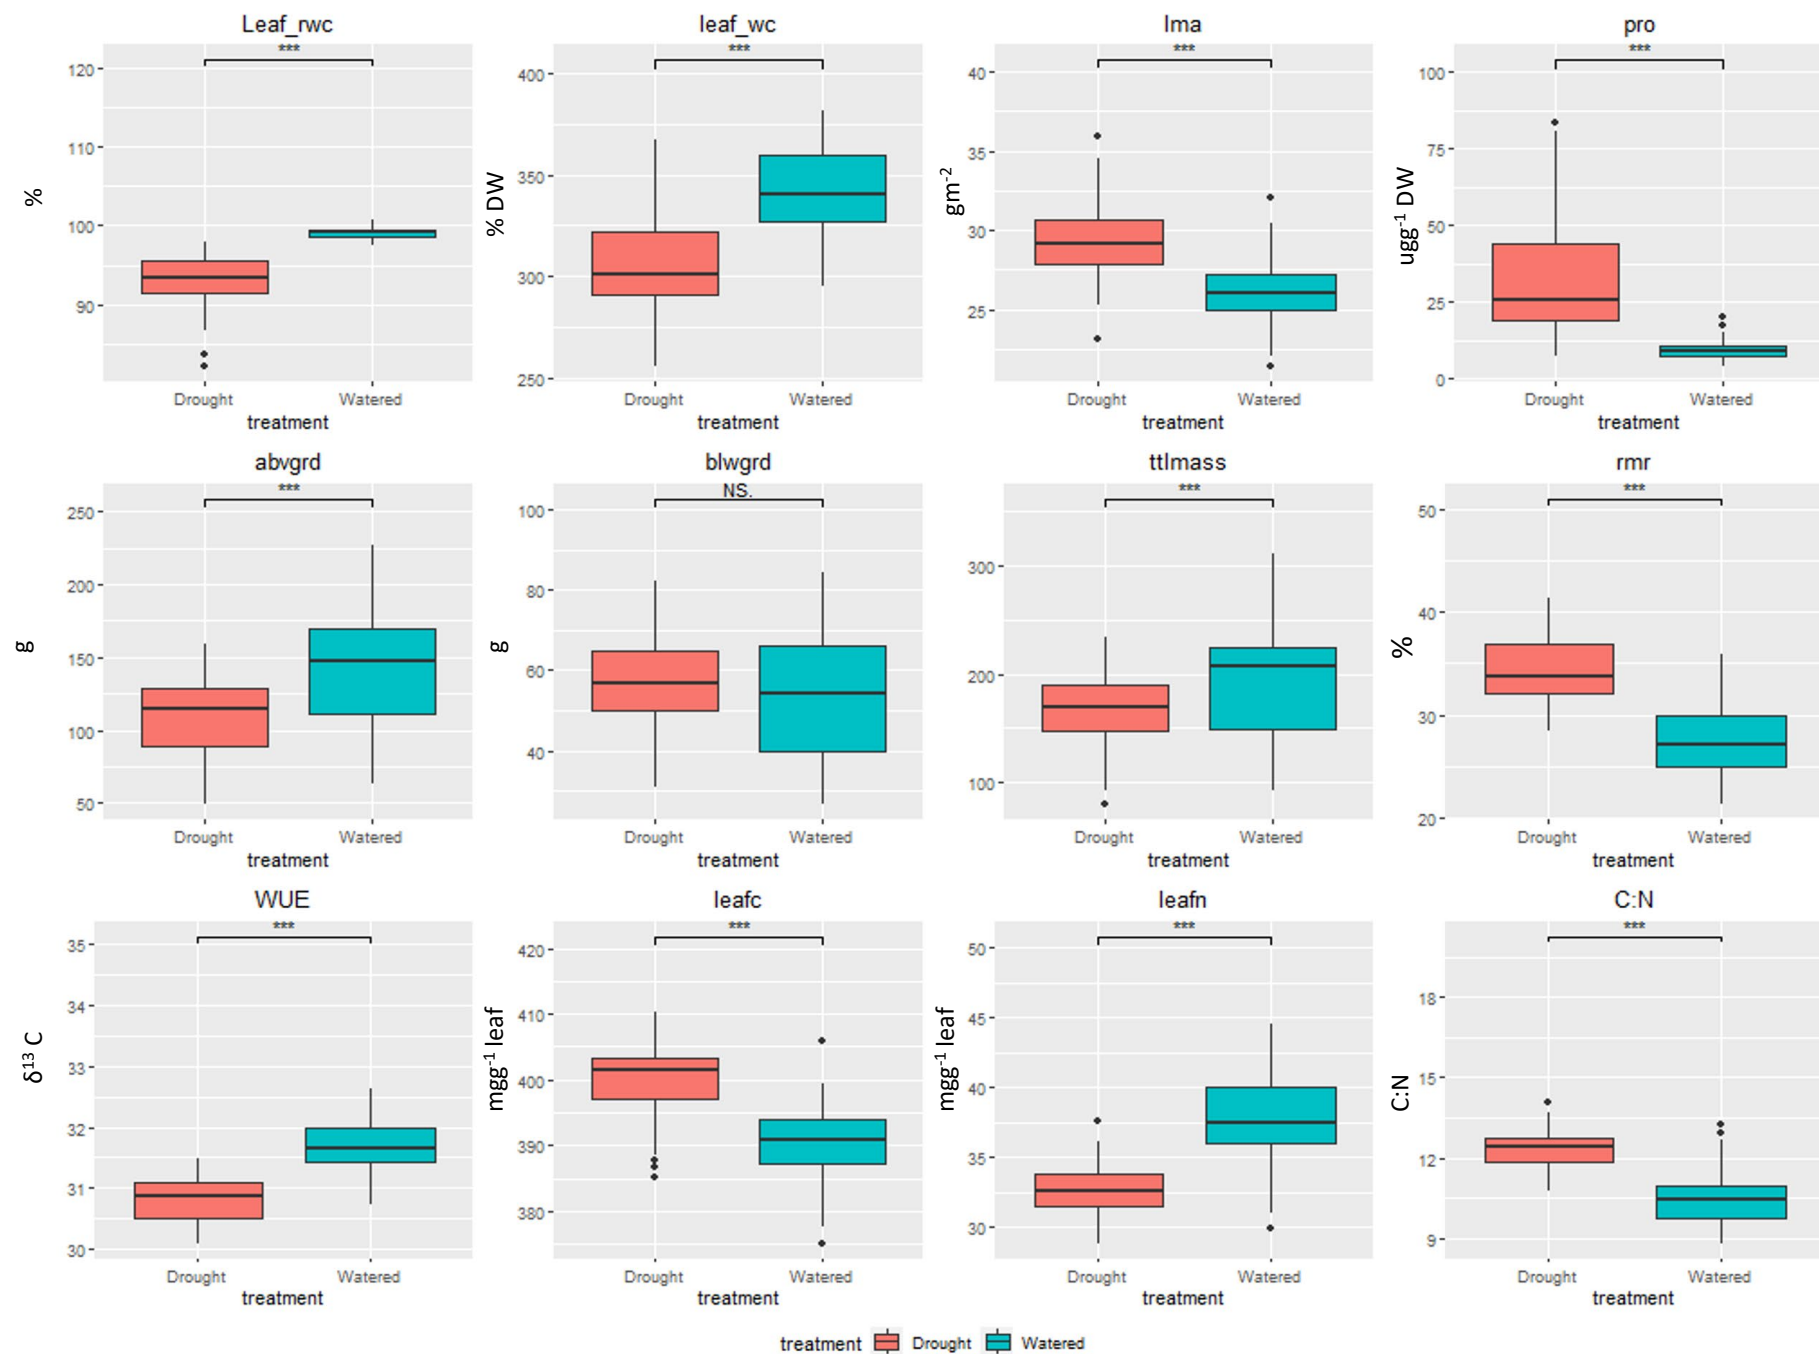

Figure S11

Bdhn1a vs phenotypic traits

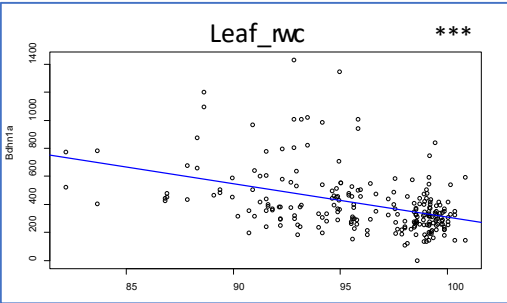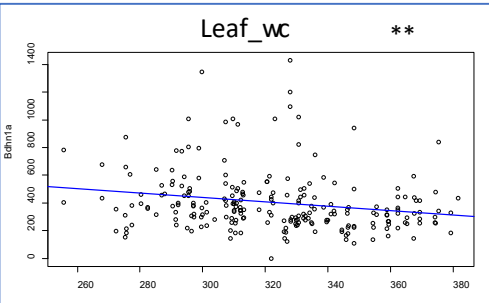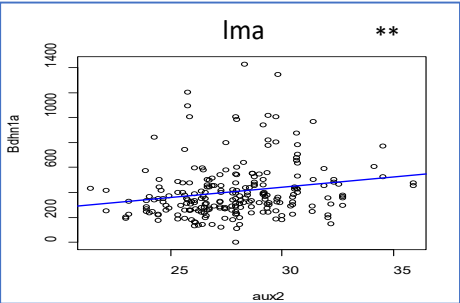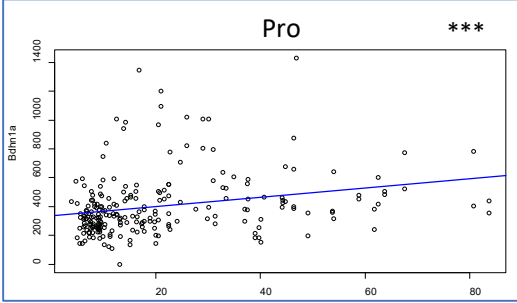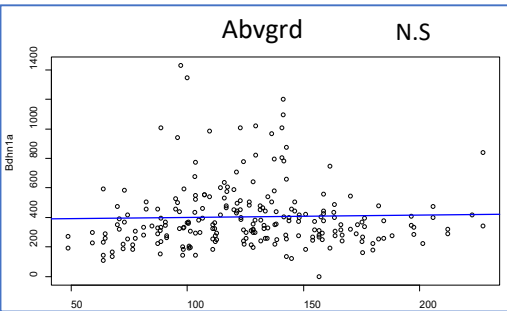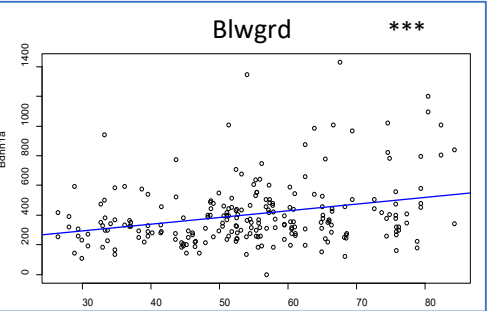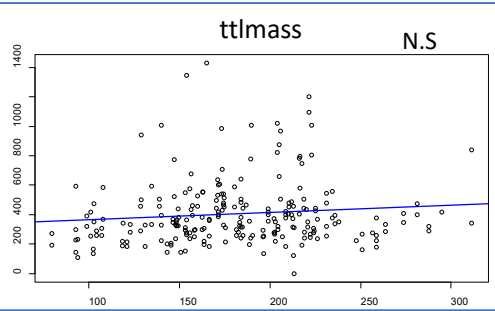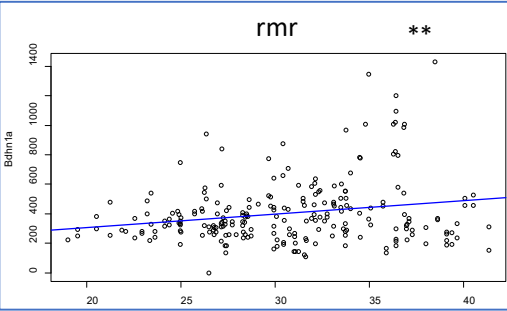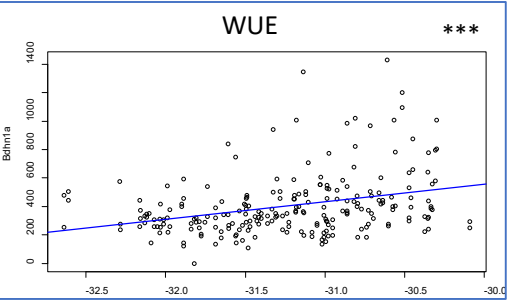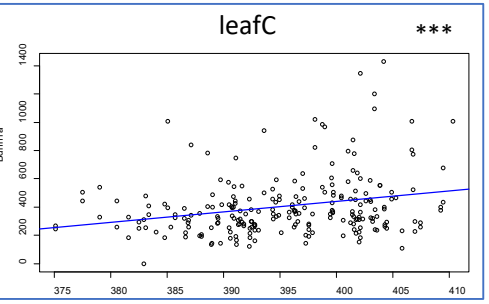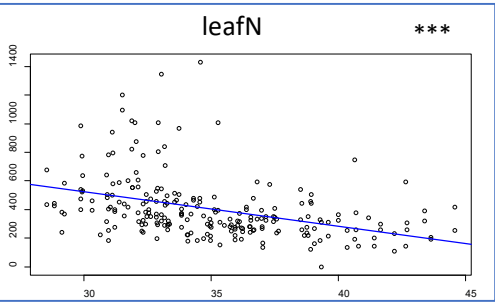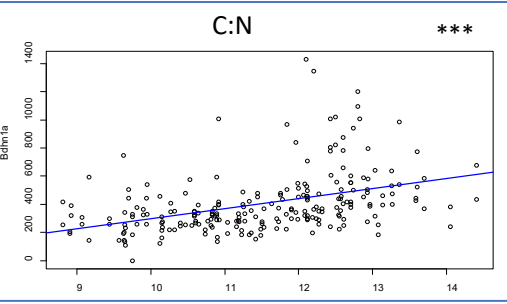

Figure S11

Bdhn2 vs phenotypic traits

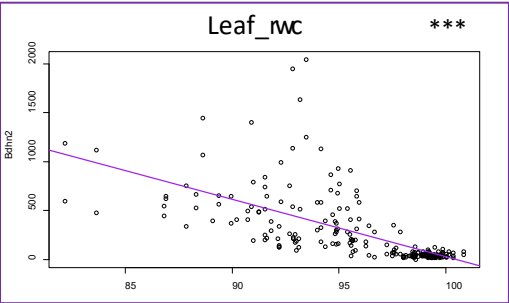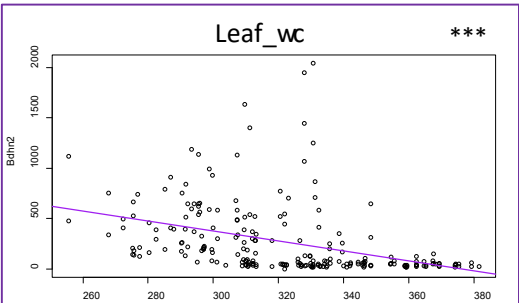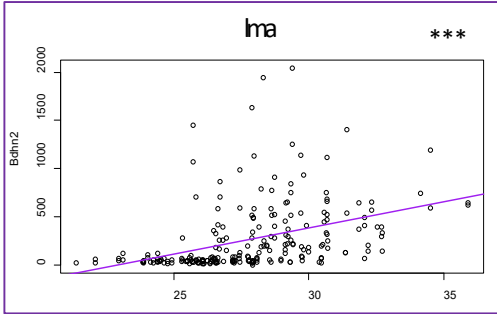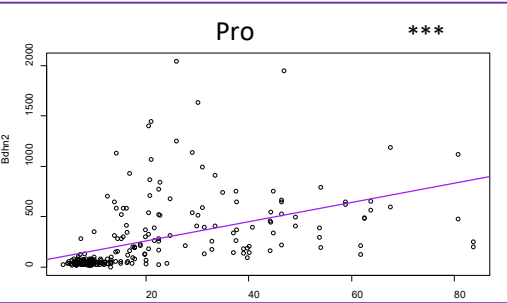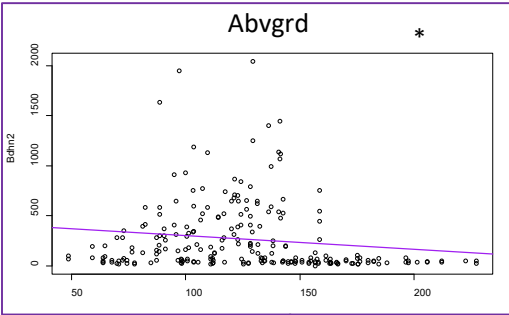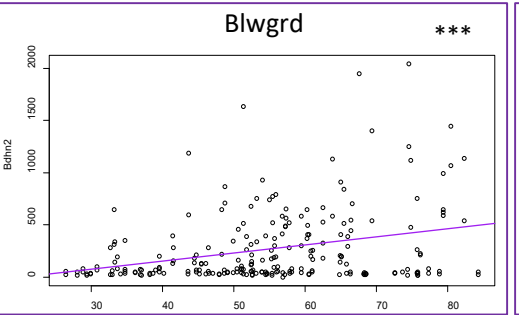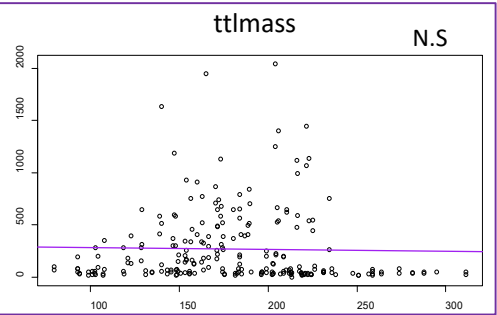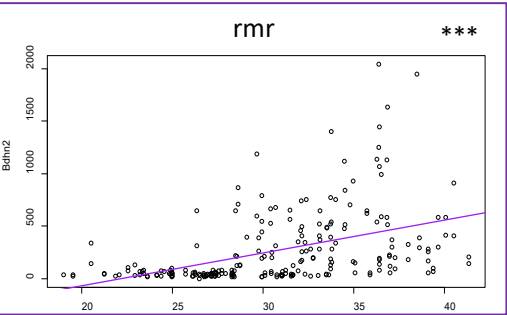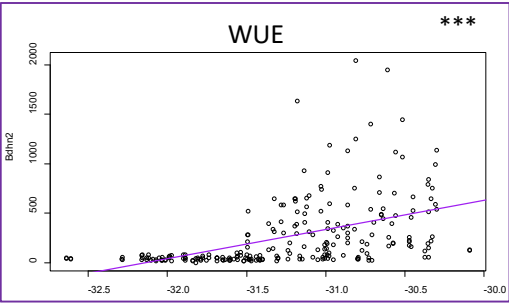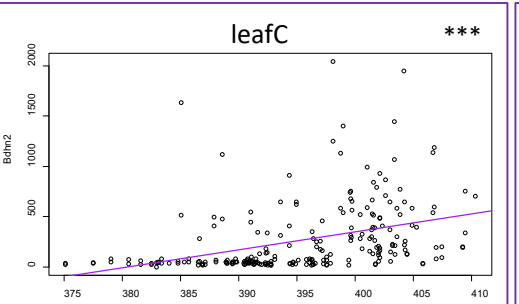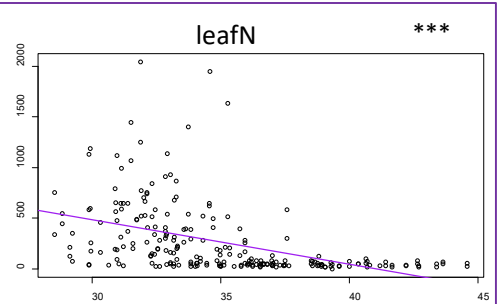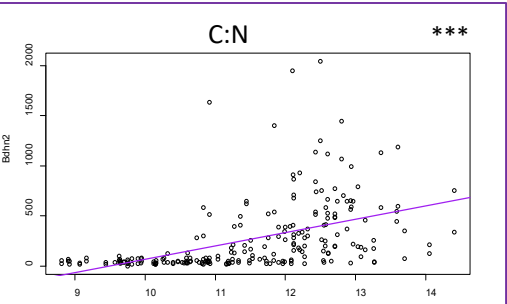

Figure S11

Bdhn3vs phenotypic traits

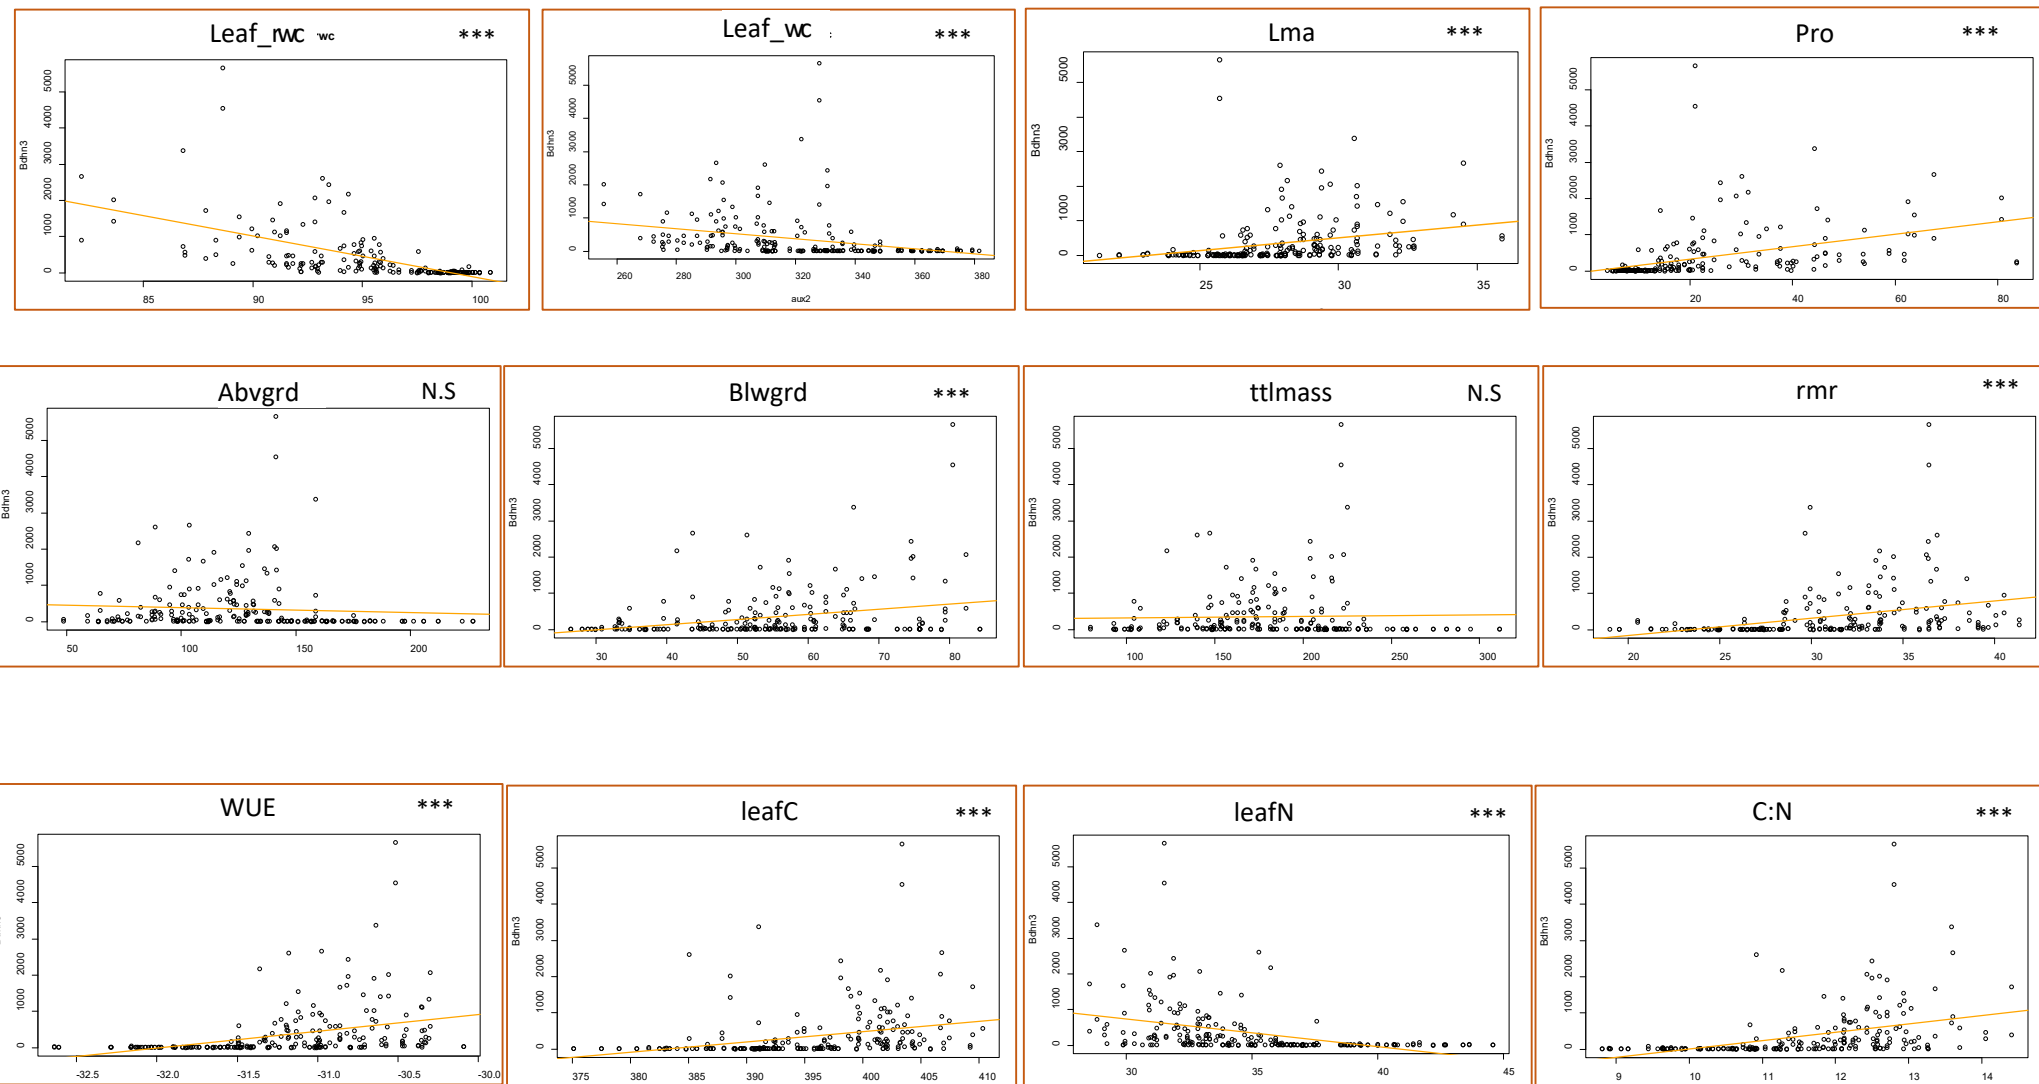

Figure S11

Bdhn7vs phenotypic traits

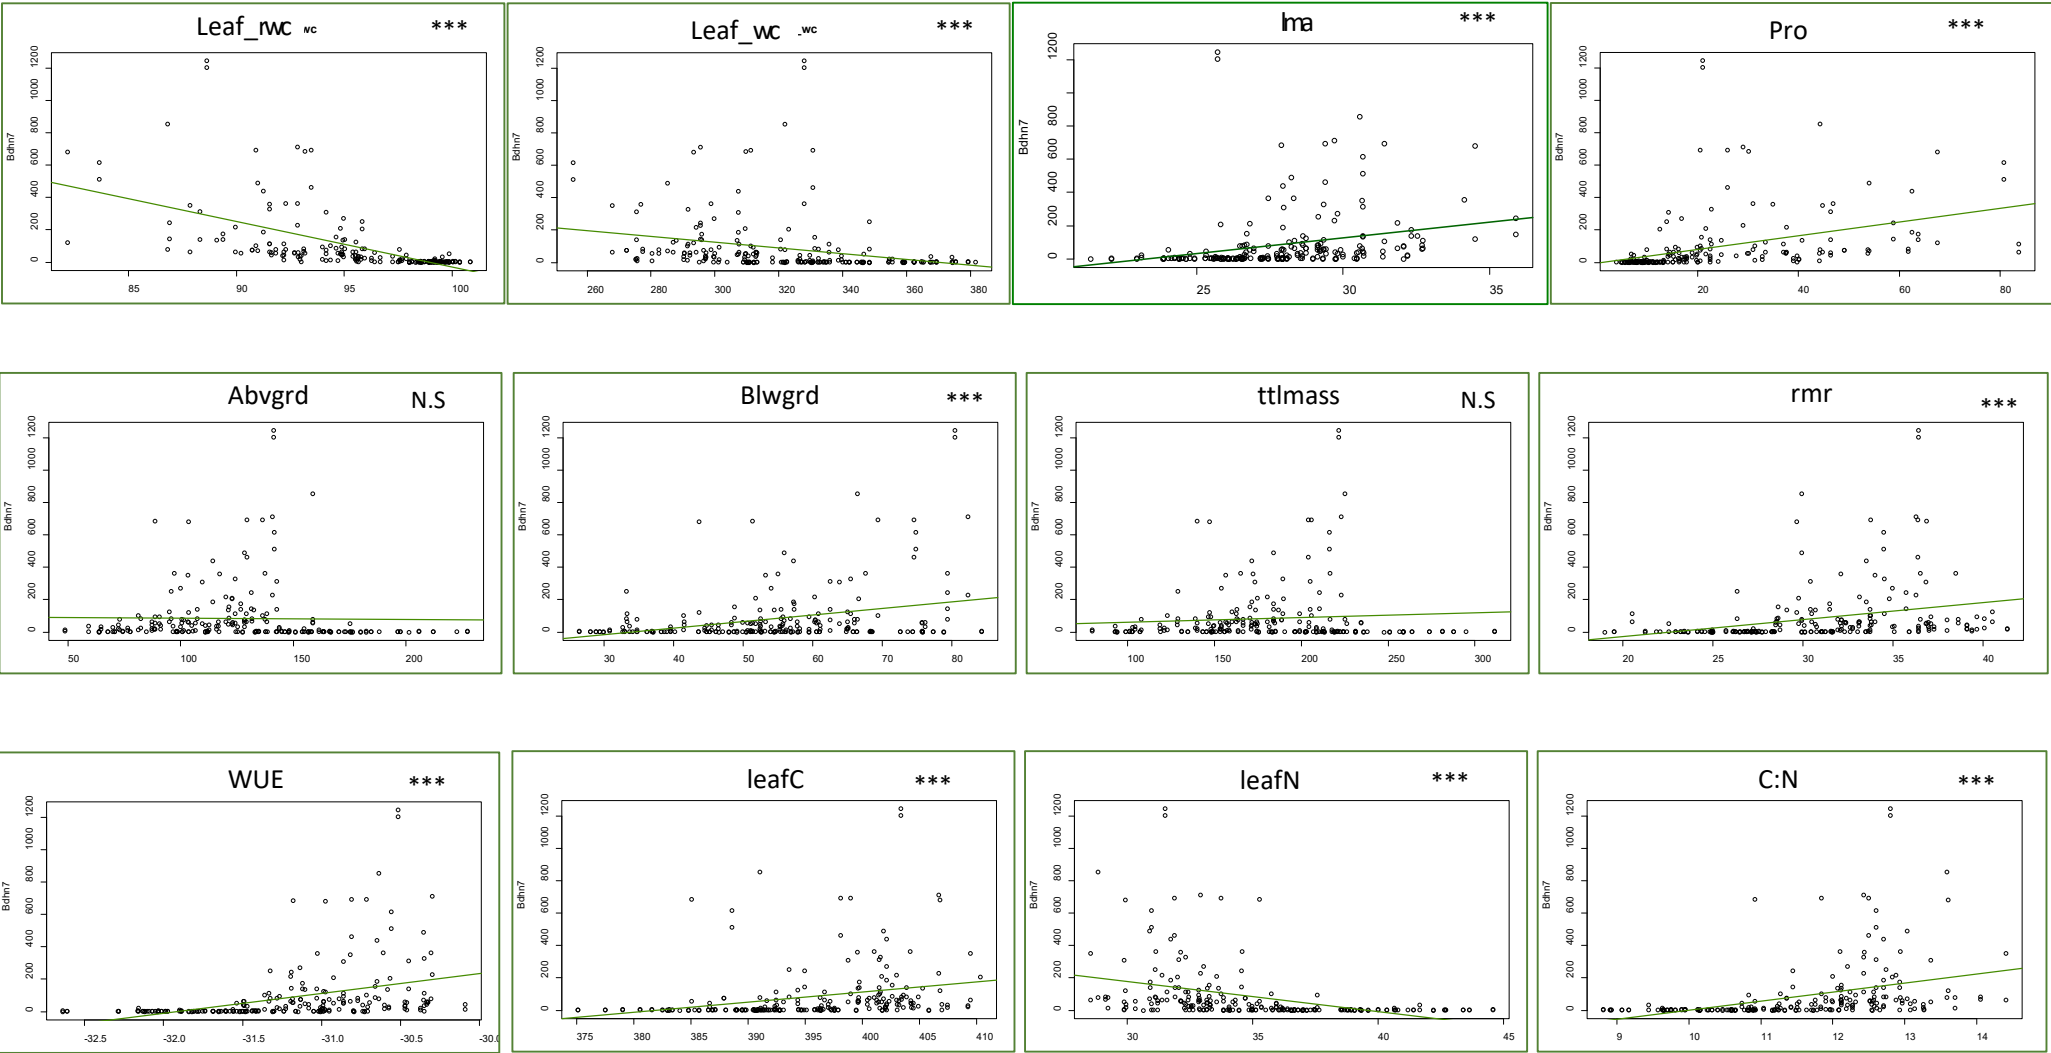

Figure S12

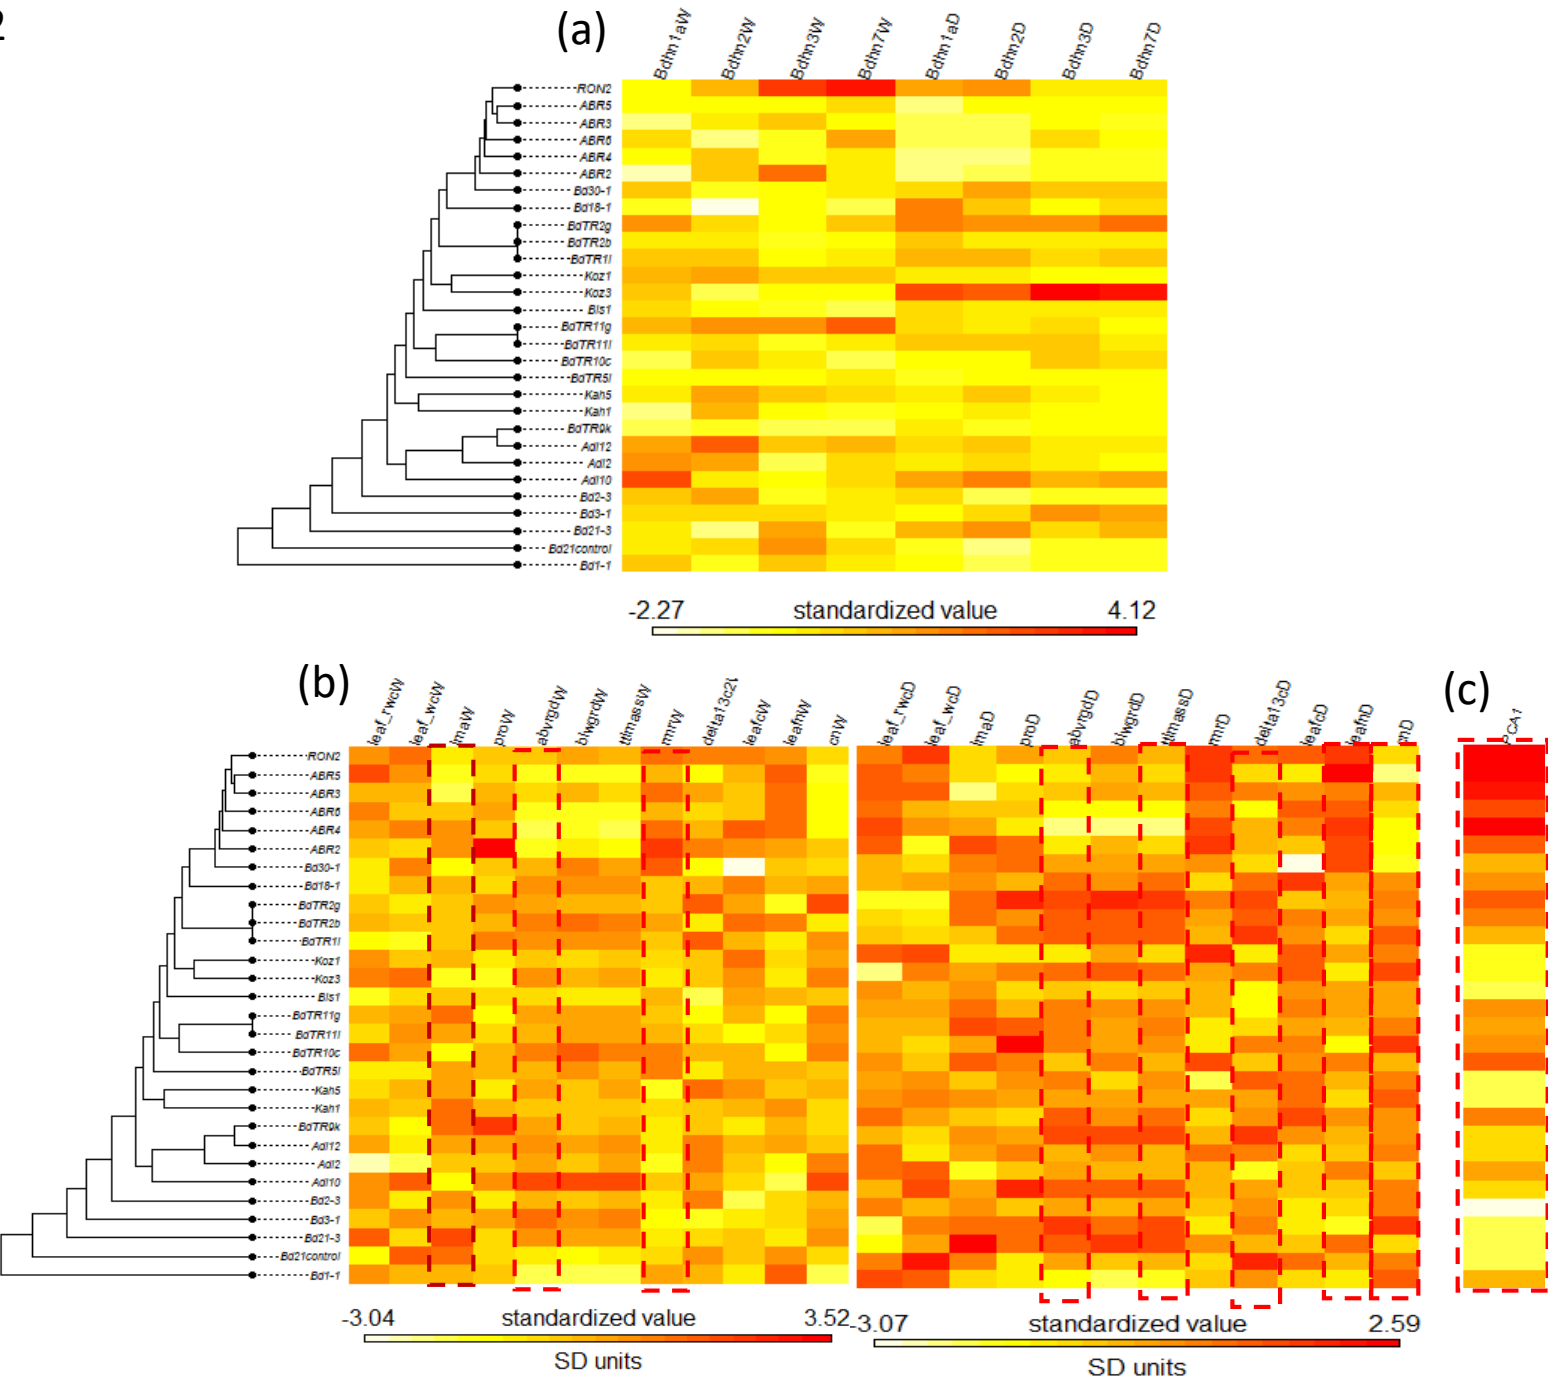

## Supplementary Materials

**Supplementary Materials S1.** Branch-site aBSREL (adaptive Branch-Site Random Effects Likelihood) and BUSTED (Branch-Site Unrestricted Statistical Test for Episodic Diversification) and site MEME (Mixed Effects Model of Evolution) tests models for potential positive selections in each of the 10 Bdh genes across the four studied species of *Brachypodium* (five genomes/subgenomes) conducted with Datamonkey2 (<https://www.datamonkey.org/>). Results from all selection tests are shown for **(a)** aBSREL and **(b)** BUSTED models, which searched for positive selection at branch-site across the entire phylogeny and at internal nodes or leaf nodes, and for **(c)** MEME (Mixed Effects Model of Evolution) model, which tested for potential diversifying selection at individual sites under a proportion of branches. Significant p-values (positive selection) are highlighted in bold.

### (a) aBSREL

| aBSREL  |             |              |                                  |                   |                                  |               |                                  |
|---------|-------------|--------------|----------------------------------|-------------------|----------------------------------|---------------|----------------------------------|
| Bdh     | Name        | All branches |                                  | internal branches |                                  | leaf branches |                                  |
|         |             | Test p-value | $\omega$ distribution over sites | Test p-value      | $\omega$ distribution over sites | Test p-value  | $\omega$ distribution over sites |
| Bdhn1_2 | BDHNBDIS1   | 1            | 10000000000                      | 1                 | 10000000000                      | 1             | 10000000000                      |
| Bdhn1_2 | BDHNBDIS2   | 1            | 10000000000                      | 1                 | 10000000000                      | 1             | 10000000000                      |
| Bdhn1_2 | BDHNBHYBD1  | 1            | 10000000000                      | 1                 | 10000000000                      | 1             | 10000000000                      |
| Bdhn1_2 | BDHNBHYBD2  | 1            | 0.00                             | 1                 | 0.00                             | 1             | 0.00                             |
| Bdhn1_2 | BDHNBHYBS1  | 1            | 1.00                             | 1                 | 1.00                             | 1             | 1.00                             |
| Bdhn1_2 | BDHNBHYBS2  | 1            | 10000000000                      | 1                 | 10000000000                      | 1             | 10000000000                      |
| Bdhn1_2 | BDHNBSTA1   | 1            | 0.00                             | 1                 | 0.00                             | 1             | 0.00                             |
| Bdhn1_2 | BDHNBSTA2   | 1            | 10000000000                      | 1                 | 10000000000                      | 1             | 10000000000                      |
| Bdhn1_2 | BDHNB SYL1A | 1            | 0.123                            | 1                 | 0.123                            | 1             | 0.123                            |



|         |            |   |             |        |      |             |  |      |             |
|---------|------------|---|-------------|--------|------|-------------|--|------|-------------|
| Bdhn1_2 | BDHNBSYL1B | 1 | 0.264       |        | 1    | 0.264       |  | 1    | 0.264       |
| Bdhn1_2 | BDHNBSYL2  | 1 | 0.00        |        | 1    | 0.00        |  | 1    | 0.00        |
| Bdhn1_2 | BDHNBSYL2  |   | 3.65        |        |      | 3.65        |  |      | 3.65        |
| Bdhn1_2 | Node10     | 1 | 0.151       |        | 1    | 0.151       |  | 1    | 0.151       |
| Bdhn1_2 | Node14     | 1 | 0.253       |        | 1    | 0.253       |  | 1    | 0.253       |
| Bdhn1_2 | Node17     | 1 | 0.00        |        | 1    | 0.00        |  | 1    | 0.00        |
| Bdhn1_2 | Node2      | 1 | 0.332       |        | 1    | 0.332       |  | 1    | 0.332       |
| Bdhn1_2 | Node5      | 1 | 0.152       |        | 1    | 0.152       |  | 1    | 0.152       |
| Bdhn1_2 | Node6      | 1 | 0.778       |        | 1    | 0.778       |  | 1    | 0.778       |
|         | Node7      | 1 | 0.00        | 0,8289 | 0.00 |             |  | 1    | 0.00        |
| Bdhn1_2 | Node7      |   | 7.74        |        | 7.74 |             |  | 7.74 |             |
| Bdhn3   | BDHNBDIS3  | 1 | 0.00        |        | 1    | 0.00        |  | 1    | 0.00        |
| Bdhn3   | BDHNBHYBD3 | 1 | 0.00        |        | 1    | 0.00        |  | 1    | 0.00        |
| Bdhn3   | BDHNBHYBS3 | 1 | 10000000000 |        | 1    | 10000000000 |  | 1    | 10000000000 |
| Bdhn3   | BDHNBSTA3  | 1 | 10000000000 |        | 1    | 10000000000 |  | 1    | 10000000000 |
| Bdhn3   | BDHNBSYL3  | 1 | 0.00        |        | 1    | 0.00        |  | 1    | 0.00        |
| Bdhn3   | Node1      | 1 | 0.121       |        | 1    | 0.121       |  | 1    | 0.121       |
|         | Node5      | 1 | 0.126       |        | 1    | 0.126       |  | 1    | 0.126       |
| Bdhn4_5 | BDHNBDIS4  | 1 | 0.592       |        | 1    | 0.592       |  | 1    | 0.592       |
| Bdhn4_5 | BDHNBDIS5  | 1 | 0.00        |        | 1    | 0.00        |  | 1    | 0.00        |
| Bdhn4_5 | BDHNBHYBS5 | 1 | 1.00        |        | 1    | 1.00        |  | 1    | 1.00        |
| Bdhn4_5 | BDHNBSTA5  | 1 | 0.0778      |        | 1    | 0.0778      |  | 1    | 0.0778      |
| Bdhn4_5 | BDHNBSYL5  | 1 | 0.261       |        | 1    | 0.261       |  | 1    | 0.261       |
| Bdhn4_5 | Node3      | 1 | 0.0646      |        | 1    | 0.0646      |  | 1    | 0.0646      |
| Bdhn4_5 | Node5      | 1 | 0.00        | 0,3577 | 0.00 |             |  | 1    | 0.00        |
| Bdhn4_5 | Node5      |   | 5.37        |        | 5.37 |             |  | 5.37 |             |
| Bdhn6   | BDHNBDIS6  | 1 | 0.593       |        | 1    | 0.593       |  | 1    | 0.593       |

|              |            |        |             |               |              |        |             |
|--------------|------------|--------|-------------|---------------|--------------|--------|-------------|
| Bdhn6        | BDHNBHYBD6 | 1      | 0.239       | 1             | 0.239        | 1      | 0.239       |
| Bdhn6        | BDHNBHYBS6 | 0,278  | 0.00        | 1             | 0.00         | 0,2316 | 0.00        |
| Bdhn6        | BDHNBHYBS6 |        | 225         |               | 225          |        | 225         |
| Bdhn6        | BDHNBSTA6  | 1      | 0.00        | 1             | 0.00         | 1      | 0.00        |
| Bdhn6        | BDHNBSYL6  | 1      | 0.120       | 1             | 0.120        | 1      | 0.120       |
| Bdhn6        | Node1      | 0,5211 | 0.00        | 0,1042        | 0.00         | 1      | 0.00        |
| Bdhn6        | Node1      |        | 3.58        |               | 3.58         |        | 3.58        |
| <b>Bdhn6</b> | Node5      | 0,1398 | 0.140       | <b>0,0399</b> | <b>0.140</b> | 1      | 0.140       |
| Bdhn6        | Node5      |        | 53.7        |               | 53.7         |        | 53.7        |
| Bdhn7        | BDHNBDIS7  | 1      | 0.279       | 1             | 0.0565       | 1      | 0.279       |
| Bdhn7        | BDHNBHYBD7 | 1      | 1.00        | 1             | 0.279        | 1      | 1.00        |
| Bdhn7        | BDHNBSTA7  | 1      | 0.0707      | 1             | 1.00         | 1      | 0.0707      |
| Bdhn7        | BDHNBSYL7  | 1      | 0.0180      | 1             | 0.0707       | 1      | 0.0180      |
| Bdhn7        | Node1      | 1      | 0.0565      | 1             | 0.0180       | 1      | 0.0565      |
| Bdhn8        | BDHNBDIS8  | 1      | 1.00        | 1             | 0.288        | 1      | 1.00        |
| Bdhn8        | BDHNBHYBD8 | 1      | 0.00        | 1             | 0.289        | 1      | 0.00        |
| Bdhn8        | BDHNBHYBS8 | 1      | 10000000000 | 1             | 1.00         | 1      | 10000000000 |
| Bdhn8        | BDHNBSTA8  | 1      | 1.00        | 1             | 0.00         | 1      | 1.00        |
| Bdhn8        | BDHNBSYL8  | 1      | 0.166       | 1             | 10000000000  | 1      | 0.166       |
| Bdhn8        | Node1      | 1      | 0.288       | 1             | 1.00         | 1      | 0.288       |
| Bdhn8        | Node2      | 1      | 0.289       | 1             | 0.166        | 1      | 0.289       |
| Bdhn9        | BDHNBDIS9  | 1      | 10000000000 | 1             | 0.417        | 1      | 10000000000 |
| Bdhn9        | BDHNBHYBD9 | 1      | 0.417       | 1             | 0.264        | 1      | 0.417       |
| Bdhn9        | BDHNBSTA9  | 0,1976 | 0.264       | 1             | 0.473        | 0,1581 | 0.264       |
| Bdhn9        | BDHNBSTA9  |        | 14.3        | 1             | 10000000000  |        | 14.3        |
| Bdhn9        | BDHNBSYL9  | 1      | 0.319       |               | 14.3         | 1      | 0.319       |
| Bdhn9        | Node1      | 1      | 0.473       | 1             | 0.319        | 1      | 0.473       |

|               |             |        |        |               |             |   |        |
|---------------|-------------|--------|--------|---------------|-------------|---|--------|
| Bdhn10        | BDHBSYL10   | 1      | 0.00   | 1             | 0.00        | 1 | 1.00   |
| Bdhn10        | BDHNBDIS10  | 1      | 1.00   | 1             | 1.00        | 1 | 0.00   |
| Bdhn10        | BDHNBHYBD10 | 1      | 1.00   | 1             | 1.00        | 1 | 0.00   |
| Bdhn10        | BDHNBSTA10  | 1      | 0.00   | 1             | 0.00        |   | 100000 |
| <b>Bdhn10</b> | Node1       | 0,1123 | 0.00   | <b>0,0225</b> | <b>0.00</b> | 1 | 0.00   |
| Bdhn10        | Node1       |        | 100000 |               | 100000      | 1 | 1.00   |

## (b) BUSTED

ALL BRANCHES

| BDHN1 2 all branches |                     |            |                |           |             |                       |                       |                   |
|----------------------|---------------------|------------|----------------|-----------|-------------|-----------------------|-----------------------|-------------------|
| Model                | log L               | #. para ms | AI Cc          | CV(SR V)  | Bran ch set | ω1                    | ω2                    | ω3                |
| Unconstrained model  | -<br>17<br>23,<br>4 | -<br>43    | 35<br>34,<br>1 | 0,30<br>8 | Test        | 0.00 (1<br>3.23%<br>) | 0.00 (7<br>8.46%<br>) | 2.90 (8.30<br>%)  |
| Constrained model    | -<br>17<br>24,<br>4 | -<br>42    | 35<br>34,<br>1 | 0,34<br>9 | Test        | 0.00 (2<br>5.62%<br>) | 0.00 (5<br>4.32%<br>) | 1.00 (20.0<br>6%) |
| found no evidence    |                     |            |                |           |             |                       |                       |                   |

INTERNAL BRANCHES

| Bdhn1 2             |          |            |          | internal branches |            |              |              |              |
|---------------------|----------|------------|----------|-------------------|------------|--------------|--------------|--------------|
| Model               | log L    | #. para ms | AI Cc    | CV(SR V)          | Branch set | $\omega 1$   | $\omega 2$   | $\omega 3$   |
| Unconstrained model | -        |            |          |                   |            |              |              |              |
|                     | 17       |            | 35       |                   |            | 0.00         | 0.00         | 3.57         |
|                     | 23,<br>3 | 48         | 44,<br>3 | 0,30<br>3         | Test       | (79.87<br>%) | (13.27<br>%) | (6.86<br>%)  |
| Constrained model   | -        |            |          |                   | Back group | 0.00         | 0.53         | 3.36         |
|                     | 17       |            | 35       |                   |            | (83.59<br>%) | (11.03<br>%) | (5.39<br>%)  |
|                     | 24,<br>1 | 47         | 43,<br>7 | 0,33<br>2         | Test       | (71.10<br>%) | (9.40<br>%)  | (19.50<br>%) |
|                     |          |            |          |                   | Back group | 0.00         | 0.52         | 3.31         |
|                     |          |            |          |                   |            | (83.54<br>%) | (10.93<br>%) | (5.54<br>%)  |
| found no evidence   |          |            |          |                   |            |              |              |              |

LEAF BRANCHES

| Bdhn1 2             |                     |            |                |                      | leaf branches        |                      |                      |                      |
|---------------------|---------------------|------------|----------------|----------------------|----------------------|----------------------|----------------------|----------------------|
| Model               | log L               | #. para ms | AI Cc          | CV(SR V)             | Bran ch set          | $\omega 1$           | $\omega 2$           | $\omega 3$           |
| Unconstrained model | -<br>17<br>23,<br>3 | 48         | 35<br>44,<br>3 | 0,30<br>2            | Test                 | 0.00<br>(59.60<br>%) | 0.00<br>(30.84<br>%) | 2.51<br>(9.55%)      |
|                     |                     |            | Back group     | 0.00<br>(12.11<br>%) | 0.00<br>(81.16<br>%) | 3.65<br>(6.73%)      |                      |                      |
| Constrained model   | -<br>17<br>23,<br>7 | 47         | 35<br>42,<br>9 | 0,31<br>9            | Test                 | 0.00<br>(67.21<br>%) | 0.00<br>(12.04<br>%) | 1.00<br>(20.75<br>%) |
|                     |                     |            | Back group     | 0.00<br>(12.25<br>%) | 0.00<br>(80.94<br>%) | 3.60<br>(6.80%)      |                      |                      |
| found no evidence   |                     |            |                |                      |                      |                      |                      |                      |

| BDHN3 all branches  |                |            |                |          |             |                        |                  |                  |
|---------------------|----------------|------------|----------------|----------|-------------|------------------------|------------------|------------------|
| Model               | log L          | #. para ms | AI Cc          | CV(SR V) | Bran ch set | ω1                     | ω2               | ω3               |
| Unconstrained model | -<br>79<br>4,4 | -<br>31    | 16<br>53,<br>2 | 0        | Test        | 0.11 (1<br>00.00<br>%) | 0.14 (0<br>.00%) | 1.00 (0.00<br>%) |

| Bdhn3 internal branches |                |            |                |           |             |                      |                      |                     |
|-------------------------|----------------|------------|----------------|-----------|-------------|----------------------|----------------------|---------------------|
| Model                   | log L          | #. para ms | AI Cc          | CV(SR V)  | Bran ch set | ω1                   | ω2                   | ω3                  |
| Unconstrained model     | -<br>79<br>5,4 | -<br>36    | 16<br>66,<br>1 | 2,90<br>2 | Test        | 0.00<br>(55.36<br>%) | 0.00<br>(37.97<br>%) | 1.81<br>(6.68<br>%) |
|                         |                |            |                |           | Back group  | 0.19<br>(46.19<br>%) | 0.23<br>(53.81<br>%) | 0.67<br>(0.00<br>%) |

| Bdhn3 leaf branches |                |            |                |          |             |                        |                   |                  |
|---------------------|----------------|------------|----------------|----------|-------------|------------------------|-------------------|------------------|
| Model               | log L          | #. para ms | AI Cc          | CV(SR V) | Bran ch set | ω1                     | ω2                | ω3               |
| Unconstrained model | -<br>79<br>4,3 | -<br>36    | 16<br>63,<br>8 | 0        | Test        | 0.00 (2<br>1.45%<br>)  | 0.03 (71.90<br>%) | 1.00 (6.<br>65%) |
|                     |                |            |                |          | Back group  | 0.12 (1<br>00.00<br>%) | 0.15 (0.00%<br>)  | 0.17 (0.<br>00%) |

|                    |             |             |           |                   |                                  |                                  |                                 |
|--------------------|-------------|-------------|-----------|-------------------|----------------------------------|----------------------------------|---------------------------------|
| Constrain ed model | - 79<br>5,5 | 16 64,<br>2 | 2,91<br>3 | Test Back grou nd | 0.00 (79.03 %)<br>0.20 (62.01 %) | 0.00 (11.86 %)<br>0.21 (15.83 %) | 1.00 (9.11 %)<br>0.23 (22.16 %) |
| found no evidence  |             |             |           |                   |                                  |                                  |                                 |

| Bdhn4 5 all branches |       |           |        |          |            |              |              |               |
|----------------------|-------|-----------|--------|----------|------------|--------------|--------------|---------------|
| Model                | log L | #. params | AI Cc  | CV(SR V) | Branch set | $\omega 1$   | $\omega 2$   | $\omega 3$    |
| Unconstrained model  | -82   |           | 17,15, |          |            | 0.00 (5.23%) | 0.00 (3.58%) | 1.69 (9.19%)  |
|                      | -5,6  | 31        | 8      | 0        | Test       | )            | )            | )             |
| Constrained model    | 82    |           | 17     | 0,21     |            | 0.00 (6.08%) | 0.00 (2.58%) | 1.00 (14.04%) |
|                      | 5,8   | 30        | 14     | 8        | Test       | )            | )            | )             |
| found no evidence    |       |           |        |          |            |              |              |               |

| Bdhn4 5 internal branches |       |            |       |          |             |            |            |            |
|---------------------------|-------|------------|-------|----------|-------------|------------|------------|------------|
| Model                     | log L | #. para ms | AI Cc | CV(SR V) | Bran ch set | $\omega 1$ | $\omega 2$ | $\omega 3$ |
| Unconstrained model       | -     |            | 17    |          |             | 0.00       | 0.00       | 5.40       |
|                           | 82    |            | 23,   |          |             | (9.54      | (87.40     | (3.07      |
|                           | 3,9   | 36         | 1     | 0        | Test        | %)         | %)         | %)         |
|                           |       |            |       |          | Back        | 0.18       | 0.59       | 2.79       |
| Constrained model         | -     |            | 17    |          |             | (100.0     | (0.00      | (0.00      |
|                           | 82    |            | 23,   |          | grou        | 0%)        | %)         | %)         |
|                           | 5     | 35         | 2     | 0.45     | nd          | 0.00       | 0.00       | 1.00       |
|                           |       |            |       |          |             | (20.44     | (71.09     | (8.47      |
| found no evidence         |       |            |       |          | Test        | %)         | %)         | %)         |
|                           |       |            |       |          | Back        | 0.14       | 1.00       | 1.82       |
|                           |       |            |       |          | grou        | (96.77     | (0.91      | (2.32      |
|                           |       |            |       |          | nd          | %)         | %)         | %)         |

| Model               | log L      | #. para ms | Bdh6     |          | all branches |                |                |                |
|---------------------|------------|------------|----------|----------|--------------|----------------|----------------|----------------|
|                     |            |            | AI Cc    | CV(SR V) | Bran ch set  | $\omega 1$     | $\omega 2$     | $\omega 3$     |
| Unconstrained model | - 24 99    | - 31       | 50 60, 8 | 1,09 7   |              | 0.03 (6 8.37%) | 0.20 (2 7.91%) | 4.43 (3.72 %)  |
| Constrained model   | - 24 99, 7 | - 30       | 50 60, 3 | 1,00 6   | Test         | 0.00 (1 7.72%) | 0.00 (6 2.95%) | 1.00 (19.3 3%) |
| found no evidence   |            |            |          |          |              |                |                |                |

| Bdhn6               |        |            |        | internal branches |             |               |               |               |
|---------------------|--------|------------|--------|-------------------|-------------|---------------|---------------|---------------|
| Model               | log L  | #. para ms | AI Cc  | CV(SR V)          | Branch set  | $\omega 1$    | $\omega 2$    | $\omega 3$    |
| Unconstrained model | 2495.7 | -36        | 5064.5 | 8,319             | Test        | 0.00 (1.56%)  | 0.00 (8.483%) | 2.10 (13.60%) |
|                     |        |            |        |                   | Back ground | 0.02 (8.196%) | 0.02 (12.97%) | 2.17 (5.07%)  |
| Constrained model   | 2496.7 | -35        | 5064.4 | 8,424             | Test        | 0.00 (7.800%) | 0.00 (0.00%)  | 1.00 (22.00%) |
|                     |        |            |        |                   | Back ground | 0.02 (8.389%) | 0.02 (11.73%) | 2.81 (4.38%)  |
| found no evidence   |        |            |        |                   |             |               |               |               |

Bdhn7      internal branches

Bdhn7      leaf branches

|          | #.  | CV(  | Branch |     |            |            |            |
|----------|-----|------|--------|-----|------------|------------|------------|
| Model    | log | para | AI     | set | $\omega 1$ | $\omega 2$ | $\omega 3$ |
| Unconstr | L   | ms   | Cc     |     | 0.04 (8    | 0.05 (1    |            |
| ained    | 89  |      | 48,    |     | 9.57%      | 0.43%      | 1.51 (0.00 |
| model    | 3,8 | 29   | 1      | 3   | Test       | )          | %)         |

found no evidence

|                        | log         | #. para ms | AI Cc          | CV(SR V)  | Branch set       |                                                    |                                            |                                           |
|------------------------|-------------|------------|----------------|-----------|------------------|----------------------------------------------------|--------------------------------------------|-------------------------------------------|
| Model Unstrained model | L - 89<br>2 | 34         | 18<br>55,<br>4 | 0.99<br>4 | Test Back ground | ω1<br>0.04 (1<br>00.00<br>(%)<br>0.00 (9<br>7.33%) | ω2<br>0.12 (0<br>.00%)<br>0.02 (0<br>.00%) | ω3<br>1.39<br>(%)<br>20.76<br>(2.67<br>%) |

found no evidence

|                           | log  | #. para ms | AI Cc  | CV(SR V) | Bran ch set      |                          |                           |                          |
|---------------------------|------|------------|--------|----------|------------------|--------------------------|---------------------------|--------------------------|
| Model Unconstrained model | - 89 |            | 18 55, | 0.99     |                  | $\omega_1$ 0.00 (3.75 %) | $\omega_2$ 0.00 (93.59 %) | $\omega_3$ 20.77 (2.66%) |
|                           | 2    | 34         | 4      | 4        | Test Back ground | 0.04 (100.0 0%)          | 0.19 (0.00 %)             | 14.28 (0.00%)            |

found no  
evidence

| Bdhn8               |       |            |       | all branches |            |            |            |            |
|---------------------|-------|------------|-------|--------------|------------|------------|------------|------------|
| Model               | log L | #. para ms | AI Cc | CV(SR V)     | Branch set | $\omega 1$ | $\omega 2$ | $\omega 3$ |
| Unconstrained model | -     |            |       |              |            | 0.01 (4    | 0.02 (3    |            |
|                     | 91    |            | 19    | 0.43         |            | 5.60%)     | 2.73%)     | 1.09 (21.6 |
|                     | 9.8   | 31         | 04    | 6            | Test       | )          | )          | 7%)        |
|                     | -     |            | 19    |              |            | 0.00 (3    | 0.00 (3    |            |
| Constrained model   | 91    |            | 01.   | 0.44         |            | 9.91%      | 5.61%      | 1.00 (24.4 |
|                     | 9.8   | 30         | 8     | 1            | Test       | )          | )          | 8%)        |

found no  
evidence

| Bdhm8               |     |      |     | internal branches |      |            |            |            |
|---------------------|-----|------|-----|-------------------|------|------------|------------|------------|
|                     | log | #.   | AI  | CV(               | Br   |            |            |            |
| Model               | L   | para | Cc  | SR                | ch   | $\omega_1$ | $\omega_2$ | $\omega_3$ |
| Unconstrained model | -   |      |     | V)                | set  | 0.00       | 1.00       | 1.38       |
|                     | 91  |      | 19  | 0.45              |      | (75.71     | (3.37      | (20.9      |
|                     | 9,4 | 36   | 14  | 3                 | Test | %)         | %)         | %)         |
|                     |     |      |     |                   | Back | 0.06       | 0.29       | 1.79       |
|                     |     |      |     |                   | grou | (77.14     | (18.09     | (4.77      |
|                     |     |      |     |                   | nd   | %)         | %)         | %)         |
|                     | -   |      | 19  |                   |      | 0.00       | 1.00       | 1.00       |
| Constrained model   | 91  |      | 11, | 0.47              |      | (69.94     | (26.07     | (3.99      |
|                     | 9,4 | 35   | 9   | 8                 | Test | %)         | %)         | %)         |
|                     |     |      |     |                   | Back | 0.06       | 0.32       | 1.75       |
|                     |     |      |     |                   | grou | (78.01     | (17.31     | (4.68      |
|                     |     |      |     |                   | nd   | %)         | %)         | %)         |

found no  
evidence

|                     |       | Bdm8       |       | leaf branches |            |                |               |                |
|---------------------|-------|------------|-------|---------------|------------|----------------|---------------|----------------|
| Model               | log L | #. para ms | AI Cc | CV(SR V)      | Branch set | $\omega 1$     | $\omega 2$    | $\omega 3$     |
| Unconstrained model | -     |            |       |               |            | 0.09           | 1.00          |                |
|                     | 91    |            | 19    |               |            | (93.50 %)      | (0.00 %)      | 1.57 (6.50%)   |
|                     | 9,4   | 36         | 14    | 0,45          | Test group | 0.00 (76.27 %) | 0.00 (0.00 %) | 1.35 (23.72 %) |
|                     |       |            |       |               | nd         | (%)            | (%)           | (%)            |
| Constrained model   | -     |            | 19    |               |            | 0.06           | 0.92          | 1.00           |
|                     | 91    |            | 11,   | 0,45          |            | (86.67 %)      | (0.00 %)      | (13.33 %)      |
|                     | 9,4   | 35         | 8     | 5             | Test group | 0.00 (75.76 %) | 0.00 (0.04 %) | 1.32 (24.20 %) |
|                     |       |            |       |               | nd         | (%)            | (%)           | (%)            |

found no  
evidence

|                     |         |            | Bdln9   |          | all branches |                |                |                |
|---------------------|---------|------------|---------|----------|--------------|----------------|----------------|----------------|
| Model               | log L   | #. para ms | AI Cc   | CV(SR V) | Bran ch set  | ω1             | ω2             | ω3             |
| Unconstrained model | 11 87.7 | - 29       | 24 35.3 | 1.25 6   | Test         | 0.00 (4 10.0%) | 0.00 (1 5.17%) | 1.00 (44.7 3%) |

|                     | Bdln9  |            |        | internal branches |            |              |                |              |
|---------------------|--------|------------|--------|-------------------|------------|--------------|----------------|--------------|
| Model               | log L  | #. para ms | A1 Cc  | CV(SR V)          | Branch set | $\omega 1$   | $\omega 2$     | $\omega 3$   |
| Unconstrained model | 1187.6 | 34         | 2445.8 | 1.105             | Test       | 0.40 (0.00%) | 0.41 (100.00%) | 1.88 (0.00%) |

| Model               | log L  | # para ms | Bdln9  |          | leaf branches |                |                |                |
|---------------------|--------|-----------|--------|----------|---------------|----------------|----------------|----------------|
|                     |        |           | AI Cc  | CV(SR V) | Bran ch set   | ω1             | ω2             | ω3             |
| Unconstrained model | 1187.6 | -         | 2445.9 | 1.274    | Test          | 0.00 (48.79 %) | 0.70 (33.75 %) | 1.16 (17.46 %) |

|                      |                    |                      |                     |                 |
|----------------------|--------------------|----------------------|---------------------|-----------------|
|                      | Back<br>grou<br>nd | 0.41<br>(99.39<br>%) | 0.42<br>(0.60<br>%) | 0.42<br>(0.01%) |
| found no<br>evidence |                    |                      |                     |                 |

(c)MEME

| MEME results |         |       |         |         |         |       |         |       |         |       |         |       |         |        |         |
|--------------|---------|-------|---------|---------|---------|-------|---------|-------|---------|-------|---------|-------|---------|--------|---------|
| BDHN1 2      |         | BDHN3 |         | BDHN4 5 |         | BDHN6 |         | BDHN7 |         | BDHN8 |         | BDHN9 |         | BDHN10 |         |
| Site         | p-value | Site  | p-value | Site    | p-value | Site  | p-value | Site  | p-value | Site  | p-value | Site  | p-value | Site   | p-value |
| 139          | 0.04    | 1     | 1       | 1       | 1       | 266   | 0.04    | 1     | 1       | 1     | 1       | 1     | 1       | 1      | 1       |
| 163          | 0.02    | 2     | 1       | 2       | 1       | 412   | 0.05    | 2     | 0.67    | 2     | 1       | 2     | 1       | 2      | 1       |
| 1            | 1       | 3     | 1       | 3       | 1       | 1     | 1       | 3     | 1       | 3     | 0.67    | 3     | 1       | 3      | 1       |
| 2            | 1       | 4     | 1       | 4       | 1       | 2     | 1       | 4     | 1       | 4     | 1       | 4     | 1       | 4      | 1       |
| 3            | 0.67    | 5     | 0.67    | 5       | 1       | 3     | 0.67    | 5     | 1       | 5     | 1       | 5     | 1       | 5      | 1       |
| 4            | 1       | 6     | 1       | 6       | 1       | 4     | 1       | 6     | 0.67    | 6     | 0.67    | 6     | 1       | 6      | 1       |
| 5            | 0.67    | 7     | 1       | 7       | 1       | 5     | 1       | 7     | 1       | 7     | 1       | 7     | 1       | 7      | 1       |
| 6            | 0.33    | 8     | 0.67    | 8       | 0.67    | 6     | 0.67    | 8     | 1       | 8     | 0.55    | 8     | 0.67    | 8      | 1       |
| 7            | 0.67    | 9     | 1       | 9       | 1       | 7     | 1       | 9     | 1       | 9     | 1       | 9     | 1       | 9      | 1       |
| 8            | 1       | 10    | 1       | 10      | 1       | 8     | 1       | 10    | 1       | 10    | 0.5     | 10    | 1       | 10     | 1       |
| 9            | 0.45    | 11    | 1       | 11      | 1       | 9     | 1       | 11    | 1       | 11    | 1       | 11    | 1       | 11     | 1       |
| 10           | 1       | 12    | 1       | 12      | 0.67    | 10    | 0.67    | 12    | 1       | 12    | 1       | 12    | 1       | 12     | 1       |
| 11           | 1       | 13    | 1       | 13      | 1       | 11    | 1       | 13    | 1       | 13    | 1       | 13    | 1       | 13     | 1       |
| 12           | 1       | 14    | 0.67    | 14      | 1       | 12    | 1       | 14    | 0.55    | 14    | 0.55    | 14    | 1       | 14     | 1       |
| 13           | 0.37    | 15    | 1       | 15      | 1       | 13    | 0.34    | 15    | 1       | 15    | 1       | 15    | 1       | 15     | 1       |
| 14           | 1       | 16    | 1       | 16      | 1       | 14    | 1       | 16    | 1       | 16    | 1       | 16    | 1       | 16     | 0.67    |
| 15           | 1       | 17    | 1       | 17      | 0.67    | 15    | 0.67    | 17    | 1       | 17    | 1       | 17    | 1       | 17     | 1       |
| 16           | 0.67    | 18    | 1       | 18      | 1       | 16    | 1       | 18    | 1       | 18    | 1       | 18    | 0.67    | 18     | 1       |
| 17           | 1       | 19    | 1       | 19      | 1       | 17    | 1       | 19    | 1       | 19    | 0.67    | 19    | 1       | 19     | 1       |
| 18           | 0.67    | 20    | 1       | 20      | 1       | 18    | 1       | 20    | 1       | 20    | 1       | 20    | 1       | 20     | 1       |
| 19           | 1       | 21    | 1       | 21      | 1       | 19    | 1       | 21    | 0.67    | 21    | 0.67    | 21    | 1       | 21     | 1       |

|    |      |    |      |    |      |    |      |    |      |    |      |    |      |    |      |
|----|------|----|------|----|------|----|------|----|------|----|------|----|------|----|------|
| 20 | 1    | 22 | 1    | 22 | 1    | 20 | 0,52 | 22 | 1    | 22 | 0,67 | 22 | 1    | 22 | 1    |
| 21 | 1    | 23 | 1    | 23 | 1    | 21 | 1    | 23 | 0,67 | 23 | 0,67 | 23 | 1    | 23 | 1    |
| 22 | 1    | 24 | 1    | 24 | 1    | 22 | 1    | 24 | 0,67 | 24 | 0,67 | 24 | 1    | 24 | 1    |
| 23 | 0,67 | 25 | 1    | 25 | 0,32 | 23 | 0,67 | 25 | 0,67 | 25 | 0,67 | 25 | 1    | 25 | 1    |
| 24 | 0,67 | 26 | 0,48 | 26 | 1    | 24 | 0,67 | 26 | 1    | 26 | 1    | 26 | 1    | 26 | 1    |
| 25 | 0,67 | 27 | 0,67 | 27 | 1    | 25 | 0,67 | 27 | 1    | 27 | 1    | 27 | 1    | 27 | 1    |
| 26 | 1    | 28 | 1    | 28 | 1    | 26 | 0,36 | 28 | 1    | 28 | 0,67 | 28 | 1    | 28 | 0,67 |
| 27 | 1    | 29 | 1    | 29 | 1    | 27 | 0,35 | 29 | 1    | 29 | 0,31 | 29 | 1    | 29 | 1    |
| 28 | 0,67 | 30 | 1    | 30 | 1    | 28 | 1    | 30 | 1    | 30 | 1    | 30 | 1    | 30 | 1    |
| 29 | 1    | 31 | 1    | 31 | 1    | 29 | 1    | 31 | 1    | 31 | 1    | 31 | 1    | 31 | 1    |
| 30 | 1    | 32 | 0,67 | 32 | 1    | 30 | 0,67 | 32 | 1    | 32 | 1    | 32 | 1    | 32 | 1    |
| 31 | 1    | 33 | 1    | 33 | 1    | 31 | 1    | 33 | 0,67 | 33 | 1    | 33 | 1    | 33 | 1    |
| 32 | 1    | 34 | 1    | 34 | 1    | 32 | 1    | 34 | 0,67 | 34 | 0,67 | 34 | 1    | 34 | 1    |
| 33 | 0,67 | 35 | 0,67 | 35 | 1    | 33 | 0,34 | 35 | 1    | 35 | 1    | 35 | 1    | 35 | 1    |
| 34 | 1    | 36 | 1    | 36 | 0,67 | 34 | 1    | 36 | 1    | 36 | 1    | 36 | 0,4  | 36 | 1    |
| 35 | 0,52 | 37 | 1    | 37 | 1    | 35 | 0,37 | 37 | 1    | 37 | 0,55 | 37 | 1    | 37 | 1    |
| 36 | 1    | 38 | 1    | 38 | 1    | 36 | 1    | 38 | 0,37 | 38 | 1    | 38 | 0,67 | 38 | 1    |
| 37 | 1    | 39 | 1    | 39 | 0,67 | 37 | 0,67 | 39 | 0,67 | 39 | 0,38 | 39 | 0,67 | 39 | 1    |
| 38 | 1    | 40 | 1    | 40 | 1    | 38 | 1    | 40 | 1    | 40 | 0,67 | 40 | 1    | 40 | 0,67 |
| 39 | 1    | 41 | 1    | 41 | 1    | 39 | 0,67 | 41 | 1    | 41 | 1    | 41 | 0,42 | 41 | 0,67 |
| 40 | 1    | 42 | 1    | 42 | 1    | 40 | 0,67 | 42 | 1    | 42 | 1    | 42 | 1    | 42 | 1    |
| 41 | 1    | 43 | 1    | 43 | 1    | 41 | 1    | 43 | 1    | 43 | 1    | 43 | 1    | 43 | 1    |
| 42 | 1    | 44 | 1    | 44 | 1    | 42 | 1    | 44 | 1    | 44 | 1    | 44 | 1    | 44 | 1    |
| 43 | 1    | 45 | 1    | 45 | 1    | 43 | 1    | 45 | 1    | 45 | 0,67 | 45 | 1    | 45 | 1    |
| 44 | 1    | 46 | 1    | 46 | 1    | 44 | 0,67 | 46 | 1    | 46 | 1    | 46 | 0,67 | 46 | 1    |
| 45 | 1    | 47 | 1    | 47 | 1    | 45 | 1    | 47 | 1    | 47 | 1    | 47 | 1    | 47 | 1    |
| 46 | 1    | 48 | 1    | 48 | 1    | 46 | 0,08 | 48 | 1    | 48 | 1    | 48 | 0,62 | 48 | 1    |
| 47 | 1    | 49 | 1    | 49 | 1    | 47 | 0,56 | 49 | 1    | 49 | 1    | 49 | 1    | 49 | 1    |



|    |      |    |      |    |      |    |      |    |      |    |      |    |      |    |      |
|----|------|----|------|----|------|----|------|----|------|----|------|----|------|----|------|
| 48 | 0,67 | 50 | 0,45 | 50 | 1    | 48 | 1    | 50 | 0,67 | 50 | 1    | 50 | 1    | 50 | 1    |
| 49 | 0,07 | 51 | 1    | 51 | 0,57 | 49 | 1    | 51 | 1    | 51 | 0,53 | 51 | 1    | 51 | 0,67 |
| 50 | 1    | 52 | 1    | 52 | 1    | 50 | 1    | 52 | 1    | 52 | 0,67 | 52 | 0,67 | 52 | 1    |
| 51 | 1    | 53 | 1    | 53 | 0,67 | 51 | 0,67 | 53 | 1    | 53 | 1    | 53 | 0,22 | 53 | 1    |
| 52 | 1    | 54 | 1    | 54 | 1    | 52 | 0,34 | 54 | 1    | 54 | 1    | 54 | 1    | 54 | 1    |
| 53 | 1    | 55 | 0,67 | 55 | 0,67 | 53 | 0,67 | 55 | 1    | 55 | 1    | 55 | 0,39 | 55 | 1    |
| 54 | 1    | 56 | 1    | 56 | 1    | 54 | 0,25 | 56 | 1    | 56 | 1    | 56 | 0,67 | 56 | 1    |
| 55 | 1    | 57 | 1    | 57 | 1    | 55 | 0,67 | 57 | 1    | 57 | 1    | 57 | 0,67 | 57 | 1    |
| 56 | 1    | 58 | 1    | 58 | 1    | 56 | 0,52 | 58 | 1    | 58 | 0,67 | 58 | 1    | 58 | 1    |
| 57 | 1    | 59 | 1    | 59 | 1    | 57 | 1    | 59 | 1    | 59 | 0,28 | 59 | 1    | 59 | 1    |
| 58 | 1    | 60 | 1    | 60 | 1    | 58 | 1    | 60 | 1    | 60 | 0,67 | 60 | 1    | 60 | 1    |
| 59 | 1    | 61 | 1    | 61 | 1    | 59 | 1    | 61 | 1    | 61 | 1    | 61 | 1    | 61 | 1    |
| 60 | 0,5  | 62 | 1    | 62 | 1    | 60 | 1    | 62 | 1    | 62 | 0,44 | 62 | 0,67 | 62 | 1    |
| 61 | 1    | 63 | 1    | 63 | 1    | 61 | 1    | 63 | 1    | 63 | 0,54 | 63 | 1    | 63 | 0,67 |
| 62 | 1    | 64 | 1    | 64 | 0,67 | 62 | 0,67 | 64 | 1    | 64 | 1    | 64 | 0,56 | 64 | 1    |
| 63 | 0,45 | 65 | 0,67 | 65 | 1    | 63 | 0,39 | 65 | 1    | 65 | 1    | 65 | 0,12 | 65 | 1    |
| 64 | 0,67 | 66 | 1    | 66 | 1    | 64 | 1    | 66 | 1    | 66 | 1    | 66 | 0,45 | 66 | 1    |
| 65 | 0,67 | 67 | 1    | 67 | 1    | 65 | 1    | 67 | 1    | 67 | 1    | 67 | 0,52 | 67 | 1    |
| 66 | 1    | 68 | 1    | 68 | 1    | 66 | 0,24 | 68 | 1    | 68 | 1    | 68 | 1    | 68 | 1    |
| 67 | 0,45 | 69 | 1    | 69 | 0,52 | 67 | 0,67 | 69 | 1    | 69 | 0,47 | 69 | 1    | 69 | 1    |
| 68 | 0,49 | 70 | 1    | 70 | 1    | 68 | 1    | 70 | 1    | 70 | 1    | 70 | 0,26 | 70 | 1    |
| 69 | 1    | 71 | 1    | 71 | 1    | 69 | 1    | 71 | 1    | 71 | 0,67 | 71 | 1    | 71 | 0,67 |
| 70 | 0,67 | 72 | 1    | 72 | 1    | 70 | 1    | 72 | 1    | 72 | 1    | 72 | 1    | 72 | 1    |
| 71 | 1    | 73 | 1    | 73 | 0,67 | 71 | 1    | 73 | 1    | 73 | 1    | 73 | 1    | 73 | 1    |
| 72 | 0,52 | 74 | 1    | 74 | 0,67 | 72 | 1    | 74 | 1    | 74 | 1    | 74 | 0,67 | 74 | 1    |
| 73 | 1    | 75 | 0,37 | 75 | 1    | 73 | 1    | 75 | 1    | 75 | 1    | 75 | 0,67 | 75 | 1    |
| 74 | 1    | 76 | 1    | 76 | 1    | 74 | 0,67 | 76 | 1    | 76 | 1    | 76 | 1    | 76 | 1    |
| 75 | 1    | 77 | 1    | 77 | 0,67 | 75 | 0,42 | 77 | 0,67 | 77 | 1    | 77 | 1    | 77 | 1    |

|     |      |     |      |     |      |     |      |     |      |     |      |     |      |     |   |
|-----|------|-----|------|-----|------|-----|------|-----|------|-----|------|-----|------|-----|---|
| 76  | 1    | 78  | 1    | 78  | 1    | 76  | 1    | 78  | 1    | 78  | 1    | 78  | 1    | 78  | 1 |
| 77  | 1    | 79  | 1    | 79  | 1    | 77  | 0,67 | 79  | 0,67 | 79  | 1    | 79  | 1    | 79  | 1 |
| 78  | 0,67 | 80  | 1    | 80  | 0,67 | 78  | 1    | 80  | 1    | 80  | 1    | 80  | 1    | 80  | 1 |
| 79  | 1    | 81  | 0,67 | 81  | 1    | 79  | 0,46 | 81  | 1    | 81  | 1    | 81  | 1    | 81  | 1 |
| 80  | 1    | 82  | 1    | 82  | 1    | 80  | 1    | 82  | 1    | 82  | 1    | 82  | 0,36 | 82  | 1 |
| 81  | 1    | 83  | 1    | 83  | 1    | 81  | 0,29 | 83  | 0,67 | 83  | 1    | 83  | 1    | 83  | 1 |
| 82  | 1    | 84  | 1    | 84  | 1    | 82  | 0,23 | 84  | 1    | 84  | 1    | 84  | 1    | 84  | 1 |
| 83  | 0,67 | 85  | 1    | 85  | 0,67 | 83  | 0,21 | 85  | 1    | 85  | 1    | 85  | 0,36 | 85  | 1 |
| 84  | 1    | 86  | 1    | 86  | 1    | 84  | 0,18 | 86  | 1    | 86  | 1    | 86  | 1    | 86  | 1 |
| 85  | 1    | 87  | 1    | 87  | 1    | 85  | 0,67 | 87  | 1    | 87  | 1    | 87  | 1    | 87  | 1 |
| 86  | 0,67 | 88  | 1    | 88  | 1    | 86  | 0,38 | 88  | 1    | 88  | 1    | 88  | 1    | 88  | 1 |
| 87  | 1    | 89  | 0,67 | 89  | 0,67 | 87  | 1    | 89  | 1    | 89  | 1    | 89  | 1    | 89  | 1 |
| 88  | 1    | 90  | 0,18 | 90  | 1    | 88  | 1    | 90  | 1    | 90  | 1    | 90  | 1    | 90  | 1 |
| 89  | 1    | 91  | 1    | 91  | 0,55 | 89  | 0,56 | 91  | 1    | 91  | 1    | 91  | 0,67 | 91  | 1 |
| 90  | 0,67 | 92  | 1    | 92  | 0,67 | 90  | 1    | 92  | 1    | 92  | 1    | 92  | 0,42 | 92  | 1 |
| 91  | 1    | 93  | 0,47 | 93  | 1    | 91  | 0,22 | 93  | 1    | 93  | 1    | 93  | 0,67 | 93  | 1 |
| 92  | 1    | 94  | 0,67 | 94  | 1    | 92  | 0,67 | 94  | 1    | 94  | 1    | 94  | 1    | 94  | 1 |
| 93  | 1    | 95  | 1    | 95  | 1    | 93  | 1    | 95  | 1    | 95  | 1    | 95  | 0,67 | 95  | 1 |
| 94  | 1    | 96  | 1    | 96  | 1    | 94  | 1    | 96  | 1    | 96  | 1    | 96  | 1    | 96  | 1 |
| 95  | 1    | 97  | 1    | 97  | 1    | 95  | 0,39 | 97  | 1    | 97  | 1    | 97  | 1    | 97  | 1 |
| 96  | 1    | 98  | 1    | 98  | 1    | 96  | 0,67 | 98  | 1    | 98  | 1    | 98  | 1    | 98  | 1 |
| 97  | 1    | 99  | 1    | 99  | 1    | 97  | 1    | 99  | 0,67 | 99  | 1    | 99  | 0,37 | 99  | 1 |
| 98  | 0,16 | 100 | 1    | 100 | 0,67 | 98  | 0,67 | 100 | 0,67 | 100 | 1    | 100 | 1    | 100 | 1 |
| 99  | 0,67 | 101 | 1    | 101 | 1    | 99  | 1    | 101 | 1    | 101 | 0,67 | 101 | 0,67 | 101 | 1 |
| 100 | 1    | 102 | 1    | 102 | 1    | 100 | 0,67 | 102 | 1    | 102 | 1    | 102 | 1    | 102 | 1 |
| 101 | 0,67 | 103 | 1    | 103 | 1    | 101 | 1    | 103 | 1    | 103 | 0,67 | 103 | 1    | 103 | 1 |
| 102 | 0,67 | 104 | 1    | 104 | 1    | 102 | 1    | 104 | 1    | 104 | 1    | 104 | 1    | 104 | 1 |
| 103 | 1    | 105 | 1    | 105 | 0,67 | 103 | 1    | 105 | 1    | 105 | 1    | 105 | 1    | 105 | 1 |

|     |      |     |      |     |      |     |      |     |      |     |      |     |      |     |   |
|-----|------|-----|------|-----|------|-----|------|-----|------|-----|------|-----|------|-----|---|
| 104 | 0,67 | 106 | 1    | 106 | 1    | 104 | 0,67 | 106 | 1    | 106 | 0,67 | 106 | 0,67 | 106 | 1 |
| 105 | 1    | 107 | 1    | 107 | 0,58 | 105 | 1    | 107 | 1    | 107 | 0,67 | 107 | 1    | 107 | 1 |
| 106 | 1    | 108 | 1    | 108 | 1    | 106 | 1    | 108 | 1    | 108 | 1    | 108 | 1    | 108 | 1 |
| 107 | 1    | 109 | 0,38 | 109 | 0,58 | 107 | 0,67 | 109 | 1    | 109 | 0,4  | 109 | 1    |     |   |
| 108 | 1    | 110 | 0,67 | 110 | 0,45 | 108 | 1    | 110 | 1    | 110 | 1    | 110 | 1    |     |   |
| 109 | 1    | 111 | 1    | 111 | 1    | 109 | 1    | 111 | 0,67 | 111 | 1    | 111 | 1    |     |   |
| 110 | 0,67 | 112 | 1    | 112 | 0,67 | 110 | 1    | 112 | 0,67 | 112 | 1    | 112 | 1    |     |   |
| 111 | 0,67 | 113 | 0,67 | 113 | 1    | 111 | 0,67 | 113 | 0,67 | 113 | 1    | 113 | 1    |     |   |
| 112 | 0,67 | 114 | 0,67 | 114 | 0,4  | 112 | 0,67 | 114 | 1    | 114 | 0,67 | 114 | 1    |     |   |
| 113 | 0,67 | 115 | 1    | 115 | 0,67 | 113 | 0,67 | 115 | 0,67 | 115 | 0,67 | 115 | 1    |     |   |
| 114 | 1    | 116 | 1    | 116 | 1    | 114 | 1    | 116 | 1    | 116 | 0,67 | 116 | 1    |     |   |
| 115 | 1    | 117 | 1    | 117 | 1    | 115 | 1    | 117 | 1    | 117 | 0,67 | 117 | 1    |     |   |
| 116 | 1    | 118 | 0,45 | 118 | 1    | 116 | 1    | 118 | 0,67 | 118 | 0,67 | 118 | 0,61 |     |   |
| 117 | 1    | 119 | 1    | 119 | 1    | 117 | 1    | 119 | 1    | 119 | 1    | 119 | 1    |     |   |
| 118 | 1    | 120 | 1    | 120 | 1    | 118 | 1    | 120 | 1    | 120 | 0,36 | 120 | 1    |     |   |
| 119 | 1    | 121 | 1    | 121 | 1    | 119 | 1    | 121 | 0,67 | 121 | 1    | 121 | 0,45 |     |   |
| 120 | 1    | 122 | 1    | 122 | 1    | 120 | 1    | 122 | 0,67 | 122 | 1    | 122 | 1    |     |   |
| 121 | 0,67 | 123 | 1    | 123 | 1    | 121 | 0,34 | 123 | 0,67 | 123 | 1    | 123 | 1    |     |   |
| 122 | 0,67 | 124 | 1    | 124 | 1    | 122 | 0,67 | 124 | 1    | 124 | 1    | 124 | 0,48 |     |   |
| 123 | 0,67 | 125 | 1    | 125 | 1    | 123 | 0,67 | 125 | 1    | 125 | 0,67 | 125 | 1    |     |   |
| 124 | 1    | 126 | 1    | 126 | 1    | 124 | 1    | 126 | 1    | 126 | 0,67 | 126 | 1    |     |   |
| 125 | 1    | 127 | 1    | 127 | 0,25 | 125 | 0,67 | 127 | 0,67 | 127 | 0,67 | 127 | 1    |     |   |
| 126 | 1    | 128 | 1    | 128 | 0,67 | 126 | 0,67 | 128 | 0,67 | 128 | 1    | 128 | 0,49 |     |   |
| 127 | 0,67 | 129 | 1    | 129 | 0,4  | 127 | 1    | 129 | 0,08 | 129 | 1    | 129 | 1    |     |   |
| 128 | 1    | 130 | 1    | 130 | 1    | 128 | 0,67 | 130 | 1    | 130 | 0,67 | 130 | 1    |     |   |
| 129 | 1    | 131 | 1    | 131 | 1    | 129 | 0,67 | 131 | 1    | 131 | 1    | 131 | 1    |     |   |
| 130 | 1    | 132 | 1    | 132 | 1    | 130 | 0,49 | 132 | 1    | 132 | 1    | 132 | 0,59 |     |   |
| 131 | 0,54 | 133 | 0,67 | 133 | 1    | 131 | 0,38 | 133 | 1    | 133 | 1    | 133 | 0,2  |     |   |

|     |      |     |      |     |      |     |      |     |      |     |      |     |      |
|-----|------|-----|------|-----|------|-----|------|-----|------|-----|------|-----|------|
| 132 | 1    | 134 | 1    | 134 | 1    | 132 | 1    | 134 | 1    | 134 | 1    | 134 | 1    |
| 133 | 0,67 | 135 | 0,27 | 135 | 0,67 | 133 | 0,67 | 135 | 1    | 135 | 1    | 135 | 1    |
| 134 | 0,67 | 136 | 1    | 136 | 1    | 134 | 1    | 136 | 1    | 136 | 1    | 136 | 1    |
| 135 | 0,22 | 137 | 1    | 137 | 1    | 135 | 1    | 137 | 0,67 | 137 | 1    | 137 | 1    |
| 136 | 1    | 138 | 1    | 138 | 0,67 | 136 | 1    | 138 | 0,67 | 138 | 0,38 | 138 | 1    |
| 137 | 0,29 | 139 | 0,47 | 139 | 0,32 | 137 | 1    | 139 | 0,67 | 139 | 1    | 139 | 1    |
| 138 | 1    | 140 | 0,67 | 140 | 0,3  | 138 | 1    | 140 | 1    | 140 | 1    | 140 | 1    |
| 140 | 0,67 | 141 | 1    | 141 | 0,67 | 139 | 1    | 141 | 0,67 | 141 | 1    | 141 | 1    |
| 141 | 0,67 | 142 | 1    | 142 | 0,67 | 140 | 1    | 142 | 1    | 142 | 1    | 142 | 1    |
| 142 | 0,67 | 143 | 1    | 143 | 1    | 141 | 1    | 143 | 0,67 | 143 | 1    | 143 | 1    |
| 143 | 0,67 | 144 | 1    | 144 | 1    | 142 | 0,67 | 144 | 0,67 | 144 | 0,36 | 144 | 1    |
| 144 | 0,44 | 145 | 1    | 145 | 1    | 143 | 1    | 145 | 0,67 | 145 | 1    | 145 | 1    |
| 145 | 0,18 | 146 | 1    | 146 | 1    | 144 | 1    | 146 | 1    | 146 | 1    | 146 | 0,67 |
| 146 | 0,67 | 147 | 0,67 | 147 | 1    | 145 | 1    | 147 | 1    | 147 | 1    | 147 | 1    |
| 147 | 0,67 | 148 | 1    | 148 | 1    | 146 | 1    | 148 | 1    | 148 | 0,37 | 148 | 1    |
| 148 | 1    | 149 | 1    | 149 | 1    | 147 | 0,67 | 149 | 1    | 149 | 1    | 149 | 1    |
| 149 | 1    | 150 | 1    | 150 | 1    | 148 | 1    | 150 | 1    | 150 | 0,35 | 150 | 1    |
| 150 | 0,67 | 151 | 1    | 151 | 0,67 | 149 | 0,67 | 151 | 1    | 151 | 1    | 151 | 1    |
| 151 | 0,3  | 152 | 1    | 152 | 0,67 | 150 | 1    | 152 | 1    | 152 | 0,67 | 152 | 1    |
| 152 | 1    | 153 | 1    | 153 | 1    | 151 | 1    | 153 | 1    | 153 | 1    | 153 | 0,39 |
| 153 | 0,67 | 154 | 0,67 | 154 | 1    | 152 | 1    | 154 | 1    | 154 | 0,56 | 154 | 1    |
| 154 | 0,67 | 155 | 1    | 155 | 1    | 153 | 0,67 | 155 | 1    | 155 | 0,38 | 155 | 1    |
| 155 | 0,67 | 156 | 1    | 156 | 1    | 154 | 1    | 156 | 1    | 156 | 1    | 156 | 1    |
| 156 | 1    | 157 | 1    | 157 | 1    | 155 | 0,37 | 157 | 1    | 157 | 1    | 157 | 1    |
| 157 | 0,67 | 158 | 1    | 158 | 1    | 156 | 0,67 | 158 | 0,67 | 158 | 1    | 158 | 1    |
| 158 | 1    | 159 | 1    | 159 | 1    | 157 | 0,67 | 159 | 1    | 159 | 1    | 159 | 1    |
| 159 | 1    | 160 | 1    | 160 | 1    | 158 | 0,67 | 160 | 0,67 | 160 | 1    | 160 | 0,31 |
| 160 | 1    | 161 | 1    | 161 | 1    | 159 | 1    | 161 | 0,67 | 161 | 1    | 161 | 0,67 |

|     |      |     |      |     |   |     |      |     |      |     |      |     |      |
|-----|------|-----|------|-----|---|-----|------|-----|------|-----|------|-----|------|
| 161 | 0,67 | 162 | 1    | 162 | 1 | 160 | 0,67 | 162 | 1    | 162 | 1    | 162 | 1    |
| 162 | 0,67 | 163 | 1    | 163 | 1 | 161 | 1    | 163 | 1    | 163 | 1    | 163 | 0,67 |
| 164 | 1    | 164 | 1    | 164 | 1 | 162 | 0,33 | 164 | 0,67 | 164 | 1    | 164 | 0,67 |
| 165 | 0,41 | 165 | 1    |     |   | 163 | 1    | 165 | 1    | 165 | 1    | 165 | 1    |
| 166 | 1    | 166 | 1    |     |   | 164 | 1    | 166 | 0,67 | 166 | 1    | 166 | 1    |
| 167 | 1    | 167 | 1    |     |   | 165 | 1    | 167 | 0,67 | 167 | 1    | 167 | 1    |
| 168 | 1    | 168 | 1    |     |   | 166 | 1    | 168 | 1    | 168 | 1    | 168 | 1    |
| 169 | 0,67 | 169 | 0,56 |     |   | 167 | 0,67 | 169 | 1    | 169 | 1    | 169 | 1    |
| 170 | 1    | 170 | 1    |     |   | 168 | 1    | 170 | 1    | 170 | 0,67 | 170 | 1    |
| 171 | 0,08 |     |      |     |   | 169 | 1    | 171 | 1    | 171 | 0,38 | 171 | 1    |
| 172 | 0,67 |     |      |     |   | 170 | 0,67 | 172 | 1    | 172 | 1    | 172 | 1    |
| 173 | 1    |     |      |     |   | 171 | 1    | 173 | 1    | 173 | 1    | 173 | 1    |
| 174 | 1    |     |      |     |   | 172 | 1    | 174 | 1    |     |      | 174 | 1    |
| 175 | 1    |     |      |     |   | 173 | 1    | 175 | 1    |     |      | 175 | 1    |
| 176 | 0,33 |     |      |     |   | 174 | 1    | 176 | 1    |     |      | 176 | 1    |
| 177 | 1    |     |      |     |   | 175 | 1    | 177 | 1    |     |      | 177 | 1    |
| 178 | 1    |     |      |     |   | 176 | 1    | 178 | 1    |     |      | 178 | 1    |
| 179 | 0,67 |     |      |     |   | 177 | 1    | 179 | 1    |     |      | 179 | 1    |
| 180 | 1    |     |      |     |   | 178 | 0,67 | 180 | 1    |     |      | 180 | 1    |
| 181 | 1    |     |      |     |   | 179 | 0,67 | 181 | 1    |     |      | 181 | 1    |
| 182 | 1    |     |      |     |   | 180 | 1    | 182 | 1    |     |      | 182 | 0,07 |
| 183 | 1    |     |      |     |   | 181 | 1    | 183 | 1    |     |      | 183 | 1    |
| 184 | 1    |     |      |     |   | 182 | 1    | 184 | 1    |     |      | 184 | 1    |
| 185 | 1    |     |      |     |   | 183 | 1    |     |      |     |      | 185 | 1    |
| 186 | 1    |     |      |     |   | 184 | 1    |     |      |     |      | 186 | 1    |
| 187 | 1    |     |      |     |   | 185 | 1    |     |      |     |      | 187 | 0,67 |
| 188 | 0,67 |     |      |     |   | 186 | 0,67 |     |      |     |      | 188 | 1    |

|     |      |
|-----|------|
| 189 | 0,67 |
| 190 | 1    |
| 191 | 1    |
| 192 | 1    |
| 193 | 0,52 |
| 194 | 1    |
| 195 | 1    |
| 196 | 1    |
| 197 | 0,32 |
| 198 | 0,65 |
| 199 | 0,67 |
| 200 | 1    |
| 201 | 1    |
| 202 | 1    |
| 203 | 1    |
| 204 | 1    |
| 205 | 0,67 |
| 206 | 0,3  |
| 207 | 0,23 |
| 208 | 1    |
| 209 | 0,67 |
| 210 | 1    |
| 211 | 0,67 |
| 212 | 1    |
| 213 | 1    |
| 214 | 0,27 |
| 215 | 0,67 |
| 216 | 0,39 |

|     |      |
|-----|------|
| 187 | 1    |
| 188 | 1    |
| 189 | 1    |
| 190 | 0,67 |
| 191 | 0,67 |
| 192 | 1    |
| 193 | 0,67 |
| 194 | 0,43 |
| 195 | 0,67 |
| 196 | 1    |
| 197 | 1    |
| 198 | 1    |
| 199 | 0,2  |
| 200 | 0,67 |
| 201 | 0,67 |
| 202 | 1    |
| 203 | 1    |
| 204 | 1    |
| 205 | 1    |
| 206 | 1    |
| 207 | 1    |
| 208 | 1    |
| 209 | 1    |
| 210 | 1    |
| 211 | 1    |
| 212 | 1    |
| 213 | 1    |
| 214 | 1    |

|     |      |
|-----|------|
| 189 | 1    |
| 190 | 1    |
| 191 | 0,67 |
| 192 | 1    |
| 193 | 1    |
| 194 | 0,47 |
| 195 | 0,47 |
| 196 | 1    |
| 197 | 1    |
| 198 | 0,38 |
| 199 | 1    |
| 200 | 1    |
| 201 | 1    |
| 202 | 1    |
| 203 | 1    |
| 204 | 1    |
| 205 | 0,67 |
| 206 | 1    |
| 207 | 1    |
| 208 | 1    |
| 209 | 1    |
| 210 | 1    |
| 211 | 1    |
| 212 | 1    |
| 213 | 1    |
| 214 | 1    |
| 215 | 1    |
| 216 | 1    |

|     |      |
|-----|------|
| 217 | 1    |
| 218 | 0,44 |
| 219 | 0,67 |
| 220 | 0,67 |
| 221 | 1    |
| 222 | 0,67 |
| 223 | 1    |
| 224 | 0,67 |
| 225 | 0,45 |
| 226 | 1    |
| 227 | 1    |
| 228 | 1    |
| 229 | 1    |
| 230 | 1    |
| 231 | 1    |
| 232 | 1    |
| 233 | 1    |
| 234 | 0,67 |
| 235 | 1    |
| 236 | 1    |
| 237 | 1    |
| 238 | 1    |
| 239 | 1    |
| 240 | 1    |
| 241 | 0,38 |
| 242 | 1    |
| 243 | 1    |
| 244 | 1    |

|     |      |
|-----|------|
| 215 | 1    |
| 216 | 1    |
| 217 | 1    |
| 218 | 1    |
| 219 | 1    |
| 220 | 1    |
| 221 | 1    |
| 222 | 1    |
| 223 | 1    |
| 224 | 1    |
| 225 | 1    |
| 226 | 1    |
| 227 | 1    |
| 228 | 1    |
| 229 | 0,33 |
| 230 | 0,67 |
| 231 | 1    |
| 232 | 0,67 |
| 233 | 1    |
| 234 | 0,67 |
| 235 | 1    |
| 236 | 0,67 |
| 237 | 0,67 |
| 238 | 0,67 |
| 239 | 1    |
| 240 | 1    |
| 241 | 0,67 |
| 242 | 1    |

|     |   |
|-----|---|
| 217 | 1 |
| 218 | 1 |
| 219 | 1 |
| 220 | 1 |
| 221 | 1 |
| 222 | 1 |
| 223 | 1 |
| 224 | 1 |
| 225 | 1 |
| 226 | 1 |
| 227 | 1 |
| 228 | 1 |
| 229 | 1 |
| 230 | 1 |
| 231 | 1 |
| 232 | 1 |
| 233 | 1 |

|     |      |
|-----|------|
| 245 | 1    |
| 246 | 1    |
| 247 | 1    |
| 248 | 0,67 |
| 249 | 0,42 |
| 250 | 1    |
| 251 | 1    |
| 252 | 1    |
| 253 | 1    |
| 254 | 1    |
| 255 | 0,67 |
| 256 | 0,67 |
| 257 | 0,67 |
| 258 | 1    |
| 259 | 0,67 |
| 260 | 1    |
| 261 | 0,39 |
| 262 | 1    |
| 263 | 1    |

|     |      |
|-----|------|
| 243 | 1    |
| 244 | 1    |
| 245 | 1    |
| 246 | 1    |
| 247 | 1    |
| 248 | 1    |
| 249 | 1    |
| 250 | 1    |
| 251 | 1    |
| 252 | 1    |
| 253 | 0,67 |
| 254 | 1    |
| 255 | 1    |
| 256 | 1    |
| 257 | 1    |
| 258 | 0,67 |
| 259 | 0,07 |
| 260 | 1    |
| 261 | 0,37 |
| 262 | 1    |
| 263 | 0,67 |
| 264 | 0,67 |
| 265 | 1    |
| 267 | 1    |
| 268 | 0,38 |
| 269 | 0,67 |
| 270 | 1    |
| 271 | 1    |



|     |      |
|-----|------|
| 272 | 0,67 |
| 273 | 1    |
| 274 | 1    |
| 275 | 1    |
| 276 | 1    |
| 277 | 1    |
| 278 | 1    |
| 279 | 1    |
| 280 | 1    |
| 281 | 1    |
| 282 | 1    |
| 283 | 1    |
| 284 | 1    |
| 285 | 1    |
| 286 | 1    |
| 287 | 1    |
| 288 | 1    |
| 289 | 1    |
| 290 | 1    |
| 291 | 1    |
| 292 | 1    |
| 293 | 1    |
| 294 | 1    |
| 295 | 1    |
| 296 | 0,67 |
| 297 | 1    |
| 298 | 1    |
| 299 | 1    |

|     |      |
|-----|------|
| 300 | 1    |
| 301 | 1    |
| 302 | 1    |
| 303 | 1    |
| 304 | 1    |
| 305 | 1    |
| 306 | 1    |
| 307 | 1    |
| 308 | 1    |
| 309 | 1    |
| 310 | 1    |
| 311 | 1    |
| 312 | 0,67 |
| 313 | 1    |
| 314 | 1    |
| 315 | 1    |
| 316 | 0,67 |
| 317 | 1    |
| 318 | 1    |
| 319 | 1    |
| 320 | 1    |
| 321 | 1    |
| 322 | 1    |
| 323 | 1    |
| 324 | 1    |
| 325 | 1    |
| 326 | 1    |
| 327 | 1    |

|     |      |
|-----|------|
| 328 | 1    |
| 329 | 1    |
| 330 | 1    |
| 331 | 1    |
| 332 | 1    |
| 333 | 1    |
| 334 | 1    |
| 335 | 1    |
| 336 | 1    |
| 337 | 1    |
| 338 | 1    |
| 339 | 1    |
| 340 | 1    |
| 341 | 1    |
| 342 | 1    |
| 343 | 1    |
| 344 | 1    |
| 345 | 0,67 |
| 346 | 1    |
| 347 | 1    |
| 348 | 1    |
| 349 | 1    |
| 350 | 1    |
| 351 | 1    |
| 352 | 1    |
| 353 | 1    |
| 354 | 0,67 |
| 355 | 0,09 |

|     |      |
|-----|------|
| 356 | 0,67 |
| 357 | 1    |
| 358 | 1    |
| 359 | 1    |
| 360 | 0,32 |
| 361 | 0,67 |
| 362 | 1    |
| 363 | 1    |
| 364 | 1    |
| 365 | 1    |
| 366 | 1    |
| 367 | 1    |
| 368 | 1    |
| 369 | 1    |
| 370 | 1    |
| 371 | 0,67 |
| 372 | 0,67 |
| 373 | 1    |
| 374 | 0,62 |
| 375 | 1    |
| 376 | 0,25 |
| 377 | 0,67 |
| 378 | 1    |
| 379 | 1    |
| 380 | 1    |
| 381 | 1    |
| 382 | 1    |
| 383 | 1    |

|     |      |
|-----|------|
| 384 | 0,67 |
| 385 | 1    |
| 386 | 1    |
| 387 | 1    |
| 388 | 1    |
| 389 | 0,67 |
| 390 | 1    |
| 391 | 1    |
| 392 | 0,67 |
| 393 | 1    |
| 394 | 0,5  |
| 395 | 1    |
| 396 | 1    |
| 397 | 0,5  |
| 398 | 0,52 |
| 399 | 0,67 |
| 400 | 1    |
| 401 | 1    |
| 402 | 1    |
| 403 | 1    |
| 404 | 1    |
| 405 | 1    |
| 406 | 0,67 |
| 407 | 1    |
| 408 | 1    |
| 409 | 1    |
| 410 | 0,67 |
| 411 | 0,67 |

|     |      |
|-----|------|
| 413 | 1    |
| 414 | 1    |
| 415 | 1    |
| 416 | 0,67 |
| 417 | 1    |
| 418 | 1    |
| 419 | 1    |
| 420 | 1    |
| 421 | 1    |
| 422 | 1    |
| 423 | 1    |
| 424 | 1    |
| 425 | 1    |
| 426 | 0,67 |
| 427 | 1    |
| 428 | 0,67 |
| 429 | 1    |
| 430 | 1    |
| 431 | 0,67 |
| 432 | 1    |
| 433 | 1    |
| 434 | 0,67 |
| 435 | 0,67 |
| 436 | 0,67 |
| 437 | 1    |
| 438 | 1    |
| 439 | 1    |
| 440 | 0,67 |

|     |      |
|-----|------|
| 441 | 1    |
| 442 | 0,67 |
| 443 | 0,33 |
| 444 | 1    |
| 445 | 1    |
| 446 | 1    |
| 447 | 1    |
| 448 | 1    |
| 449 | 0,67 |
| 450 | 1    |
| 451 | 1    |
| 452 | 1    |
| 453 | 1    |
| 454 | 0,67 |
| 455 | 1    |
| 456 | 1    |
| 457 | 1    |
| 458 | 1    |
| 459 | 1    |
| 460 | 1    |
| 461 | 1    |
| 462 | 1    |
| 463 | 1    |
| 464 | 1    |
| 465 | 1    |
| 466 | 1    |
| 467 | 0,5  |

**Supplementary Materials S2.** BLAST results for *Bdhn4* and *Bdhn5* after manual curation of the original sequences.

| Variety | BDHN  | Location         | % identity | Align len | Strands | Target from | Target to | Bitscore | # identical |
|---------|-------|------------------|------------|-----------|---------|-------------|-----------|----------|-------------|
| ABR2    | Bdhn4 | pseudomolecule_3 | 96         | 494       | +/+     | 21107895    | 21108383  | 791,162  | 473         |
| ABR2    | Bdhn5 | pseudomolecule_3 | 95         | 540       | +/+     | 21106163    | 21106698  | 843.46   | 513         |
| ABR3    | Bdhn4 | pseudomolecule_4 | 96         | 423       | +/-     | 20641618    | 20641198  | 677.55   | 405         |
| ABR3    | Bdhn5 | pseudomolecule_4 | 96         | 423       | +/-     | 20639924    | 20639505  | 677.55   | 405         |
| ABR4    | Bdhn4 | pseudomolecule_3 | 100        | 435       | +/-     | 19329768    | 19329334  | 785,752  | 435         |
| ABR4    | Bdhn5 | pseudomolecule_3 | 100        | 544       | +/-     | 19331564    | 19331021  | 982,319  | 544         |
| ABR5    | Bdhn4 | pseudomolecule_3 | 100        | 435       | +/-     | 18704044    | 18703610  | 785,752  | 435         |
| ABR5    | Bdhn5 | pseudomolecule_3 | 100        | 435       | +/-     | 18704044    | 18703610  | 785,752  | 435         |
| ABR6    | Bdhn4 | pseudomolecule_8 | 100        | 435       | +/+     | 29945020    | 29945454  | 785.752  | 435         |
| ABR6    | Bdhn5 | pseudomolecule_3 | 100        | 544       | +/-     | 23110805    | 23110262  | 982.319  | 544         |
| ABR7    | Bdhn4 | pseudomolecule_3 | 100        | 435       | +/-     | 21081433    | 21080999  | 785,752  | 435         |
| ABR7    | Bdhn5 | pseudomolecule_3 | 100        | 544       | +/-     | 21083229    | 21082686  | 982,319  | 544         |
| ABR8    | Bdhn4 | pseudomolecule_8 | 100        | 432       | +/+     | 54933510    | 54933941  | 780,342  | 432         |
| ABR8    | Bdhn5 | pseudomolecule_8 | 100        | 544       | +/+     | 54931705    | 54932248  | 982,319  | 544         |
| ABR9    | Bdhn4 | pseudomolecule_3 | 100        | 432       | +/-     | 21723159    | 21722728  | 780,342  | 432         |
| ABR9    | Bdhn5 | pseudomolecule_3 | 100        | 544       | +/-     | 21724964    | 21724421  | 982,319  | 544         |
| Adi-10  | Bdhn4 | pseudomolecule_3 | 100        | 435       | +/-     | 10831396    | 10830962  | 785,752  | 435         |
| Adi-10  | Bdhn5 | pseudomolecule_3 | 100        | 544       | +/-     | 10833192    | 10832649  | 982,319  | 544         |
| Adi-12  | Bdhn4 | pseudomolecule_3 | 96         | 494       | +/-     | 14671241    | 14670753  | 791,162  | 473         |
| Adi-12  | Bdhn5 | pseudomolecule_3 | 95         | 540       | +/-     | 14669556    | 14669021  | 843.46   | 513         |
| Adi-2   | Bdhn4 | pseudomolecule_3 | 100        | 435       | +/-     | 18208306    | 18207872  | 785,752  | 435         |
| Adi-2   | Bdhn5 | pseudomolecule_3 | 100        | 544       | +/-     | 18210102    | 18209559  | 982,319  | 544         |
| Arn1    | Bdhn4 | pseudomolecule_3 | 100        | 432       | +/-     | 21541017    | 21540586  | 780,342  | 432         |
| Arn1    | Bdhn5 | pseudomolecule_3 | 100        | 544       | +/-     | 21542822    | 21542279  | 982,319  | 544         |
| Bd18-1  | Bdhn4 | pseudomolecule_4 | 95         | 426       | +/-     | 25722056    | 25721634  | 672,139  | 406         |
| Bd18-1  | Bdhn5 | pseudomolecule_4 | 100        | 629       | +/-     | 25723949    | 25723321  | 1135.61  | 629         |



|         |       |                  |     |     |     |          |          |         |     |
|---------|-------|------------------|-----|-----|-----|----------|----------|---------|-----|
| Bd21-3  | Bdhn4 | pseudomolecule_4 | 100 | 379 | +/- | 20822271 | 20821893 | 684,763 | 379 |
| Bd21-3  | Bdhn5 | pseudomolecule_4 | 100 | 435 | +/- | 20820640 | 20820206 | 785,752 | 435 |
| Bd2-3   | Bdhn4 | pseudomolecule_3 | 96  | 494 | +/- | 14370920 | 14370432 | 791,162 | 473 |
| Bd2-3   | Bfhn5 | pseudomolecule_3 | 95  | 540 | +/- | 14369235 | 14368700 | 843.46  | 513 |
| Bd29-1  | Bdhn4 | pseudomolecule_3 | 100 | 432 | +/- | 13503849 | 13503418 | 780,342 | 432 |
| Bd29-1  | Bdhn5 | pseudomolecule_3 | 100 | 544 | +/- | 13505654 | 13505111 | 982,319 | 544 |
| BdTR11a | Bdhn4 | pseudomolecule_3 | 96  | 494 | +/- | 12991466 | 12990978 | 791,162 | 473 |
| BdTR11a | Bdhn5 | pseudomolecule_3 | 95  | 540 | +/- | 12989781 | 12989246 | 843.46  | 513 |
| BdTR11g | Bdhn4 | pseudomolecule_3 | 96  | 494 | +/- | 17897188 | 17896700 | 791,162 | 473 |
| BdTR11g | Bdhn5 | pseudomolecule_3 | 95  | 540 | +/- | 17895503 | 17894968 | 843.46  | 513 |
| BdTR12c | Bdhn4 | pseudomolecule_3 | 100 | 435 | +/- | 13785224 | 13784790 | 785,752 | 435 |
| BdTR12c | Bdhn5 | pseudomolecule_3 | 100 | 437 | +/- | 13785931 | 13785495 | 789,358 | 437 |
| BdTR13a | Bdhn4 | pseudomolecule_3 | 96  | 494 | +/- | 22341144 | 22340656 | 791,162 | 473 |
| BdTR13a | Bdhn5 | pseudomolecule_3 | 95  | 540 | +/- | 22339459 | 22338924 | 843.46  | 513 |
| BdTR13c | Bdhn4 | pseudomolecule_3 | 96  | 494 | +/- | 13768291 | 13767803 | 791,162 | 473 |
| BdTR13c | Bdhn5 | pseudomolecule_3 | 95  | 540 | +/- | 13766606 | 13766071 | 843.46  | 513 |
| BdTR1i  | Bdhn4 | pseudomolecule_4 | 96  | 494 | +/- | 22473688 | 22473200 | 791,162 | 473 |
| BdTR1i  | Bdhn5 | pseudomolecule_4 | 95  | 540 | +/- | 22472003 | 22471468 | 843.46  | 513 |
| BdTR2b  | Bdhn4 | pseudomolecule_4 | 96  | 494 | +/- | 15389921 | 15389433 | 791,162 | 473 |
| BdTR2b  | Bdhn5 | pseudomolecule_4 | 95  | 540 | +/- | 15388236 | 15387701 | 843.46  | 513 |
| BdTR2g  | Bdhn4 | pseudomolecule_3 | 96  | 494 | +/- | 13205201 | 13204713 | 791,162 | 473 |
| BdTR2g  | Bdhn5 | pseudomolecule_3 | 95  | 540 | +/- | 13203516 | 13202981 | 843.46  | 513 |
| BdTR5i  | Bdhn4 | pseudomolecule_3 | 96  | 494 | +/- | 12824085 | 12823597 | 791,162 | 473 |
| BdTR5i  | Bdhn4 | pseudomolecule_3 | 96  | 494 | +/- | 12824085 | 12823597 | 791,162 | 473 |
| BdTR5i  | Bdhn5 | pseudomolecule_3 | 95  | 540 | +/- | 12822400 | 12821865 | 843.46  | 513 |
| BdTR5i  | Bdhn5 | pseudomolecule_3 | 95  | 540 | +/- | 12822400 | 12821865 | 843.46  | 513 |
| BdTR7a  | Bdhn4 | pseudomolecule_3 | 100 | 432 | +/- | 19078503 | 19078072 | 780,342 | 432 |
| BdTR7a  | Bdhn5 | pseudomolecule_3 | 94  | 547 | +/- | 19078491 | 19077959 | 825,426 | 512 |
| BdTR8i  | Bdhn4 | pseudomolecule_4 | 96  | 423 | +/- | 18828134 | 18827714 | 673,943 | 404 |

|        |        |                  |     |     |     |          |          |         |     |
|--------|--------|------------------|-----|-----|-----|----------|----------|---------|-----|
| BdTR8i | Bdhn5  | pseudomolecule_4 | 96  | 423 | +/- | 18826440 | 18826021 | 673,943 | 404 |
| BdTR9k | Bdhn4  | pseudomolecule_3 | 96  | 494 | +/- | 13048836 | 13048348 | 791,162 | 473 |
| BdTR9k | Bdhn5  | pseudomolecule_3 | 95  | 540 | +/- | 13047151 | 13046616 | 843.46  | 513 |
| Bis-1  | Bdhn4  | pseudomolecule_3 | 96  | 494 | +/- | 15209617 | 15209129 | 785,752 | 472 |
| Bis-1  | Bdhn5  | pseudomolecule_3 | 95  | 540 | +/- | 15207932 | 15207397 | 838,049 | 512 |
| Foz1   | Bdhn4a | pseudomolecule_4 | 100 | 423 | +/- | 17367198 | 17366776 | 764.111 | 423 |
| Foz1   | Bdhn4b | pseudomolecule_4 | 100 | 435 | +/- | 17380499 | 17380065 | 785.752 | 435 |
| Jer1   | Bdhn4  | pseudomolecule_3 | 96  | 423 | +/- | 15415773 | 15415356 | 691,977 | 408 |
| Jer1   | Bdhn5  | pseudomolecule_3 | 94  | 547 | +/- | 15414082 | 15413547 | 839,853 | 515 |
| Kah-1  | Bdhn4  | pseudomolecule_7 | 100 | 435 | +/- | 73209957 | 73209523 | 785.752 | 435 |
| Kah-1  | Bdhn5  | pseudomolecule_7 | 100 | 544 | +/- | 66459104 | 66458561 | 982.319 | 544 |
| Kah-5  | Bdhn4  | pseudomolecule_3 | 96  | 494 | +/- | 17918740 | 17918252 | 791,162 | 473 |
| Kah-5  | Bdhn5  | pseudomolecule_3 | 95  | 540 | +/- | 17917055 | 17916520 | 843.46  | 513 |
| Koz-1  | Bdhn4  | pseudomolecule_3 | 96  | 494 | +/- | 18855091 | 18854603 | 791,162 | 473 |
| Koz-1  | Bdhn5  | pseudomolecule_3 | 95  | 540 | +/- | 18853406 | 18852871 | 843.46  | 513 |
| Luc1   | Bdhn4  | pseudomolecule_4 | 100 | 432 | +/- | 20923424 | 20922993 | 780.342 | 432 |
| Luc1   | Bdhn5  | pseudomolecule_4 | 100 | 629 | +/- | 20925314 | 20924686 | 1135.61 | 629 |
| Mig3   | Bdhn4  | pseudomolecule_3 | 96  | 494 | +/- | 19262494 | 19262006 | 791,162 | 473 |
| Mig3   | Bdhn5  | pseudomolecule_3 | 95  | 540 | +/- | 19260809 | 19260274 | 843.46  | 513 |
| Mur1   | Bdhn4  | pseudomolecule_8 | 97  | 434 | +/+ | 62525719 | 62526149 | 710.01  | 419 |
| Mur1   | Bdhn5  | pseudomolecule_8 | 98  | 539 | +/+ | 62527300 | 62527835 | 913,791 | 527 |
| Sig2   | Bdhn4a | pseudomolecule_3 | 100 | 435 | +/- | 17897303 | 17896869 | 785,752 | 435 |
| Sig2   | Bdhn4b | pseudomolecule_3 | 100 | 435 | +/- | 17895616 | 17895182 | 780,342 | 434 |
| Sig2   | Bdhn5  | pseudomolecule_3 | 99  | 934 | +/- | 17896001 | 17895069 | 1645.96 | 926 |
| Uni2   | Bdhn4  | pseudomolecule_3 | 96  | 494 | +/- | 15702075 | 15701587 | 791,162 | 473 |
| Uni2   | Bdhn5  | pseudomolecule_3 | 95  | 540 | +/- | 15700390 | 15699855 | 843.46  | 513 |

### **Supplementary Materials S3: *Brachypodium distachyon* drought and temperature stress experiments: grown and treatment conditions**

As described in Des Marais et al. (2017) plants were grown in 600 ml of Profile porous ceramic rooting medium (Profile Products, Buffalo Grove, IL, USA) in Deepot D40H pots (650 ml; Stuewe & Sons, Tangent, OR, USA). The dry weight of each pot was recorded to provide a baseline for the calculation of soil water content (WC). Pots were saturated with a 1:50 dilution of Liquid Grow Plant Food (Dyna-Gro, Richmond, CA, USA) by bottom watering and allowed to drip overnight to field capacity (FC). Two seeds were sown per pot and the pots were weighed to determine FC. The WC of each pot was calculated as (FC) – (dry weight); these WCs provided daily watering targets during the dry-down. Pots were cold stratified at 6°C for 14 d to ensure synchronized germination.

Plants were moved as plots on sequential days from the cold to the glasshouse. All plants germinated within 3 d, after which each pot was thinned to a single plant. During the initial growth period of 21 d, all plants were exposed to ambient glasshouse temperatures with daily highs ranging from 23°C to 28°C and night-time lows from 14°C to 18°C. Natural sunlight was supplemented by artificial lighting to ensure light levels of 400–1000  $\mu\text{mol m}^{-2}$  photosynthetically active radiation (PAR; mean of 825  $\mu\text{mol m}^{-2}$ ) for 10 h d<sup>-1</sup> (short-day conditions to prevent rapid flowering). Plants were bottom watered every second day with fresh water and once per week with fertilizer-supplemented water.

Following 21 d of initial growth, each plant received one of four treatments for 10 d in a split-plot design: Cool Wet (CW), Cool Dry (CD), Hot Wet (HW) or Hot Dry (HD), implemented as two plots of each temperature treatment with soil water treatment and genotype fully randomized within each plot. On the 22nd day of growth, each block of plants was transferred to one of four insulated open-top boxes measuring 100 cm wide by 240 cm long by 61 cm high. We placed Redi-Heat seedling mats in the bottom of two of these boxes, which resulted in an increase of c. 10°C above ambient glasshouse temperature; these plants constituted the ‘Hot’ treatment in which daytime highs were c. 35°C. The two plots of plants without seedling mats constituted the ‘Cool’ treatment, in which daytime highs were c. 25°C. Within each plot, plants were randomly

assigned to irrigation control ('Wet') or restriction ('Dry') treatments. Wet plants were watered to FC every second day with fresh water. Dry plants were hand watered daily by pipette such that the soil water was reduced by no more than 5% each day. Harvests began on the 11th day after the beginning of treatment and consisted of 8 d of phenotyping. Pot weights were recorded at harvest and showed that the pots of Dry plants averaged 45.7% soil WC (equivalent to 0.29 g H<sub>2</sub>O/g soil, SE = 0.3%), whereas Wet plants averaged 85.2% soil WC (0.54 g H<sub>2</sub>O/g soil, SE = 0.3%), regardless of temperature treatment. We have shown previously that 40–45% WC in Profile medium corresponds to soil water potentials of c. -1.2 MPa and results in a significant reduction in leaf relative water content (RWC) in *B. distachyon*. Blocks were harvested on sequential days, such that plants had spent the same amount of time from germination through treatment. Control plants did not receive this initial period of stress treatment. On the 22nd day of growth, plants were placed in a 6°C walk-in growth chamber with 270  $\mu\text{mol m}^{-2}$  PAR for 12 h d<sup>-1</sup> to stimulate flowering. After 12 wk of vernalization, plants were returned to the glasshouse under identical conditions as the initial growth period, allowed to acclimate for 5 d, and assigned to temperature and water treatments, as earlier. On the 11th day of treatment, the seedling mats were turned off and water was withheld from all plants until senescence; for most plants, this occurred within 14 d.

**Supplementary Materials S4.** Values of 12 drought-response phenotypic traits [leaf\_rwc (relative water content in leaf); leaf\_wc (water content in leaf); lma (leaf mass per área); pro (leaf proline content); abvrgd (above ground biomass); blwgrd (below ground biomass); ttlmass (total mass); rmr (root mass ratio); delta13c (carbon isotope, a proxy for lifetime integrated WUE); leafc (leaf carbon content); leafn (leaf nitrogen content); cn (leaf carbon/nitrogen ratio)] assessed in 32 *Brachypodium distachyon* ecotypes under watered (W) and drought (D) conditions, and hot (H) and cold (C) conditions (Des Marais et al. 2017)

Watered:

|               | ecotype | leaf_rwc | leaf_wc | lma     | pro     | abvrgd  | blwgrd | ttlmass | rmr     | delta13c | leafc  | leafn   | cn      |
|---------------|---------|----------|---------|---------|---------|---------|--------|---------|---------|----------|--------|---------|---------|
| BA053_HW_ABR2 | ABR2    | 99,153   | 308,91  | 28,068  | 20,0352 | 98,05   | 45,15  | 143,2   | 31,0668 | -31,559  | 397,29 | 41,3905 | 9,6409  |
| BA085_HW_ABR2 | ABR2    | 99,153   | 308,91  | 28,068  | 20,0352 | 98,05   | 45,15  | 143,2   | 31,0668 | -31,559  | 397,29 | 41,3905 | 9,6409  |
| BA403_CW_ABR2 | ABR2    | 99,0252  | 345,9   | 26,0716 | 14,9916 | 67,6    | 34,725 | 102,32  | 35,8975 | -31,0204 | 391,14 | 37,0268 | 10,8998 |
| BA447_CW_ABR2 | ABR2    | 99,0252  | 345,9   | 26,0716 | 14,9916 | 67,6    | 34,725 | 102,32  | 35,8975 | -31,0204 | 391,14 | 37,0268 | 10,8998 |
| BA096_HW_ABR3 | ABR3    | 99,1544  | 334,96  | 24,1441 | 5,3975  | 138,53  | 68,175 | 206,7   | 33,0524 | -30,9512 | 392,31 | 37,6329 | 10,5542 |
| BA413_CW_ABR3 | ABR3    | 99,2622  | 344,45  | 22,9499 | 11,1867 | 100,68  | 44,675 | 145,35  | 30,4608 | -31,7756 | 388,03 | 43,64   | 8,9042  |
| BA419_CW_ABR3 | ABR3    | 99,2622  | 344,45  | 22,9499 | 11,1867 | 100,68  | 44,675 | 145,35  | 30,4608 | -31,7756 | 388,03 | 43,64   | 8,9042  |
| BA040_HW_ABR4 | ABR4    | 98,0294  | 348,33  | 27,9507 | 11,581  | 63,725  | 29,85  | 93,575  | 31,6254 | -31,4833 | 405,79 | 42,1945 | 9,6571  |
| BA043_HW_ABR4 | ABR4    | 98,0294  | 348,33  | 27,9507 | 11,581  | 63,725  | 29,85  | 93,575  | 31,6254 | -31,4833 | 405,79 | 42,1945 | 9,6571  |
| BA477_CW_ABR4 | ABR4    | 100,85   | 367,39  | 26,4197 | 5,9426  | 63,9332 | 28,836 | 92,6436 | 31,2371 | -31,8883 | 389,73 | 42,6503 | 9,1625  |
| BA508_CW_ABR4 | ABR4    | 100,85   | 367,39  | 26,4197 | 5,9426  | 63,9332 | 28,836 | 92,6436 | 31,2371 | -31,8883 | 389,73 | 42,6503 | 9,1625  |
| BA161_HW_ABR5 | ABR5    | 100,35   | 326,17  | 26,828  | 5,4634  | 103,47  | 47,075 | 150,55  | 31,0022 | -32,0899 | 388,94 | 40,7959 | 9,5684  |
| BA479_CW_ABR5 | ABR5    | 100,04   | 369,42  | 22,095  | 8,7886  | 74,425  | 26,425 | 100,85  | 26,1643 | -32,0318 | 390,46 | 44,5742 | 8,8093  |
| BA502_CW_ABR5 | ABR5    | 100,04   | 369,42  | 22,095  | 8,7886  | 74,425  | 26,425 | 100,85  | 26,1643 | -32,0318 | 390,46 | 44,5742 | 8,8093  |
| BA153_HW_ABR6 | ABR6    | 99,7671  | 341,87  | 25,7345 | 12,5268 | 84,875  | 34,05  | 118,93  | 28,3888 | -31,6356 | 394,87 | 41,1856 | 9,6499  |
| BA437_CW_ABR6 | ABR6    | 99,7067  | 330,68  | 25,8882 | 8,9714  | 77,6    | 29,4   | 107     | 26,7787 | -32,0715 | 386,89 | 42,6801 | 9,0705  |
| BA452_CW_ABR6 | ABR6    | 99,7067  | 330,68  | 25,8882 | 8,9714  | 77,6    | 29,4   | 107     | 26,7787 | -32,0715 | 386,89 | 42,6801 | 9,0705  |
| BA008_HW_ABR8 | ABR8    | 98,3205  | 348,4   | 27,9114 | 8,9252  | 201,2   | 46,475 | 247,68  | 19,0137 | -31,1487 | 384,03 | 30,6539 | 12,5536 |
| BA360_CW_ABR8 | ABR8    | 99,4822  | 365,28  | 27,9182 | 7,53    | 158,13  | 38,15  | 196,27  | 19,5398 | -31,7883 | 382,51 | 35,7896 | 10,8115 |
| BA517_CW_ABR8 | ABR8    | 99,4822  | 365,28  | 27,9182 | 7,53    | 158,13  | 38,15  | 196,27  | 19,5398 | -31,7883 | 382,51 | 35,7896 | 10,8115 |

|                 |        |         |        |         |         |        |         |        |         |          |        |         |         |
|-----------------|--------|---------|--------|---------|---------|--------|---------|--------|---------|----------|--------|---------|---------|
| BA105_HW_Adi10  | Adi10  | 99,5952 | 368,16 | 24,5397 | 11,9688 | 222,53 | 73,6296 | 294,77 | 24,8531 | -31,5077 | 389,82 | 31,0325 | 12,6508 |
| BA428_CW_Adi10  | Adi10  | 99,4321 | 375,27 | 24,2527 | 10,4201 | 227,2  | 84,275  | 311,48 | 27,1766 | -31,6098 | 387,13 | 33,1554 | 11,9649 |
| BA520_CW_Adi10  | Adi10  | 99,4321 | 375,27 | 24,2527 | 10,4201 | 227,2  | 84,275  | 311,48 | 27,1766 | -31,6098 | 387,13 | 33,1554 | 11,9649 |
| BA041_HW_Adi12  | Adi12  | 99,6679 | 309,95 | 27,7541 | 11,0422 | 176,3  | 59,45   | 235,75 | 24,9133 | -31,0063 | 390,76 | 36,9663 | 10,6362 |
| BA044_HW_Adi12  | Adi12  | 99,6679 | 309,95 | 27,7541 | 11,0422 | 176,3  | 59,45   | 235,75 | 24,9133 | -31,0063 | 390,76 | 36,9663 | 10,6362 |
| BA407_CW_Adi12  | Adi12  | 99,1611 | 335,81 | 25,6211 | 9,891   | 161,4  | 56,125  | 217,52 | 24,964  | -31,5626 | 391,09 | 40,6269 | 9,6303  |
| BA423_CW_Adi12  | Adi12  | 99,1611 | 335,81 | 25,6211 | 9,891   | 161,4  | 56,125  | 217,52 | 24,964  | -31,5626 | 391,09 | 40,6269 | 9,6303  |
| BA176_HW_Adi2   | Adi2   | 98,717  | 301,12 | 26,5199 | 7,0812  | 157,53 | 52,625  | 210,15 | 24,545  | -31,4804 | 390,68 | 33,8382 | 11,6383 |
| BA357_CW_Adi2   | Adi2   | 97,504  | 310,82 | 25,2906 | 9,3671  | 163,35 | 48,675  | 212,02 | 23,2089 | -31,165  | 388,99 | 35,112  | 11,2449 |
| BA468_CW_Adi2   | Adi2   | 97,504  | 310,82 | 25,2906 | 9,3671  | 163,35 | 48,675  | 212,02 | 23,2089 | -31,165  | 388,99 | 35,112  | 11,2449 |
| BA354_CW_Bd1.1  | Bd1.1  | 99,4871 | 340,96 | 26,0514 | 8,6774  | 70,85  | 28,025  | 98,875 | 28,2736 | -31,6875 | 386,51 | 43,3848 | 8,9165  |
| BA496_CW_Bd1.1  | Bd1.1  | 99,4871 | 340,96 | 26,0514 | 8,6774  | 70,85  | 28,025  | 98,875 | 28,2736 | -31,6875 | 386,51 | 43,3848 | 8,9165  |
| BA060_HW_Bd18.1 | Bd18.1 | 98,0056 | 330,2  | 26,3515 | 9,0038  | 166,53 | 52,55   | 219,08 | 23,6441 | -31,8404 | 397,53 | 36,541  | 11,1618 |
| BA063_HW_Bd18.1 | Bd18.1 | 98,0056 | 330,2  | 26,3515 | 9,0038  | 166,53 | 52,55   | 219,08 | 23,6441 | -31,8404 | 397,53 | 36,541  | 11,1618 |
| BA375_CW_Bd18.1 | Bd18.1 | 99,3363 | 359,22 | 26,0987 | 6,3918  | 175,23 | 75,775  | 251    | 29,9302 | -31,5193 | 392,79 | 39,0647 | 10,1452 |
| BA446_CW_Bd18.1 | Bd18.1 | 99,3363 | 359,22 | 26,0987 | 6,3918  | 175,23 | 75,775  | 251    | 29,9302 | -31,5193 | 392,79 | 39,0647 | 10,1452 |
| BA086_HW_Bd2.3  | Bd2.3  | 98,93   | 312,26 | 27,7804 | 4,9665  | 150,93 | 57,825  | 208,75 | 27,4164 | -30,7961 | 384,77 | 34,4474 | 11,3351 |
| BA114_HW_Bd2.3  | Bd2.3  | 98,93   | 312,26 | 27,7804 | 4,9665  | 150,93 | 57,825  | 208,75 | 27,4164 | -30,7961 | 384,77 | 34,4474 | 11,3351 |
| BA487_CW_Bd2.3  | Bd2.3  | 100,14  | 334,18 | 27,1921 | 9,3872  | 134,68 | 39,55   | 174,23 | 23,4222 | -31,737  | 379    | 38,5101 | 9,953   |
| BA492_CW_Bd2.3  | Bd2.3  | 100,14  | 334,18 | 27,1921 | 9,3872  | 134,68 | 39,55   | 174,23 | 23,4222 | -31,737  | 379    | 38,5101 | 9,953   |
| BA069_HW_Bd21   | Bd21   | 98,5239 | 362,35 | 30,453  | 7,6058  | 111,7  | 36,875  | 148,58 | 24,381  | -31,4144 | 395,78 | 39,9974 | 9,8958  |
| BA112_HW_Bd21   | Bd21   | 98,5239 | 362,35 | 30,453  | 7,6058  | 111,7  | 36,875  | 148,58 | 24,381  | -31,4144 | 395,78 | 39,9974 | 9,8958  |
| BA386_CW_Bd21   | Bd21   | 98,5417 | 379,23 | 25,9302 | 7,9891  | 98,175 | 32,925  | 131,1  | 27,3518 | -31,4395 | 381,6  | 39,2661 | 9,7509  |
| BA456_CW_Bd21   | Bd21   | 98,5417 | 379,23 | 25,9302 | 7,9891  | 98,175 | 32,925  | 131,1  | 27,3518 | -31,4395 | 381,6  | 39,2661 | 9,7509  |
| BA054_HW_Bd21.3 | Bd21.3 | 100,05  | 332,87 | 29,2984 | 7,2565  | 163,6  | 60,5    | 224,1  | 26,8571 | -32,0124 | 391,3  | 35,0021 | 11,1932 |
| BA171_HW_Bd21.3 | Bd21.3 | 100,05  | 332,87 | 29,2984 | 7,2565  | 163,6  | 60,5    | 224,1  | 26,8571 | -32,0124 | 391,3  | 35,0021 | 11,1932 |
| BA458_CW_Bd21.3 | Bd21.3 | 99,7714 | 333,71 | 30,3696 | 9,4632  | 172,53 | 51,775  | 224,3  | 21,8706 | -31,7525 | 386,84 | 35,5076 | 10,928  |
| BA007_HW_Bd3.1  | Bd3.1  | 98,874  | 332,27 | 27,1868 | 13,1448 | 212,03 | 75,775  | 287,8  | 26,7347 | -31,8078 | 389,5  | 36,0408 | 10,8927 |

|                  |         |         |        |         |         |        |        |        |         |          |        |         |         |
|------------------|---------|---------|--------|---------|---------|--------|--------|--------|---------|----------|--------|---------|---------|
| BA012_HW_Bd3.1   | Bd3.1   | 98,874  | 332,27 | 27,1868 | 13,1448 | 212,03 | 75,775 | 287,8  | 26,7347 | -31,8078 | 389,5  | 36,0408 | 10,8927 |
| BA429_CW_Bd3.1   | Bd3.1   | 99,0539 | 374,33 | 25,8342 | 7,8476  | 182,28 | 49,1   | 231,38 | 21,25   | -32,6372 | 383,12 | 36,6662 | 10,4676 |
| BA434_CW_Bd3.1   | Bd3.1   | 99,0539 | 374,33 | 25,8342 | 7,8476  | 182,28 | 49,1   | 231,38 | 21,25   | -32,6372 | 383,12 | 36,6662 | 10,4676 |
| BA005_HW_Bd30.1  | Bd30.1  | 98,4703 | 359,5  | 23,884  | 8,8716  | 153,97 | 68,45  | 222,43 | 31,0447 | -31,6055 | 375,12 | 36,2257 | 10,3997 |
| BA018_HW_Bd30.1  | Bd30.1  | 98,4703 | 359,5  | 23,884  | 8,8716  | 153,97 | 68,45  | 222,43 | 31,0447 | -31,6055 | 375,12 | 36,2257 | 10,3997 |
| BA417_CW_Bd30.1  | Bd30.1  | 99,0166 | 362,25 | 24,4767 | 7,6702  | 146,13 | 72,575 | 218,7  | 33,5068 | -32,6119 | 377,51 | 38,9337 | 9,7014  |
| BA474_CW_Bd30.1  | Bd30.1  | 99,0166 | 362,25 | 24,4767 | 7,6702  | 146,13 | 72,575 | 218,7  | 33,5068 | -32,6119 | 377,51 | 38,9337 | 9,7014  |
| BA384_CW_BdTR10c | BdTR10c | 99,8547 | 346,45 | 24,4013 | 9,2635  | 179,83 | 78,85  | 258,67 | 30,1185 | -31,6498 | 390,6  | 34,091  | 11,4878 |
| BA436_CW_BdTR10c | BdTR10c | 99,8547 | 346,45 | 24,4013 | 9,2635  | 179,83 | 78,85  | 258,67 | 30,1185 | -31,6498 | 390,6  | 34,091  | 11,4878 |
| BA021_HW_BdTR11g | BdTR11g | 99,1281 | 342,14 | 28,9609 | 6,3157  | 170,22 | 60,925 | 231,15 | 26,2552 | -31,9907 | 390,9  | 33,0382 | 12,0813 |
| BA032_HW_BdTR11g | BdTR11g | 99,1281 | 342,14 | 28,9609 | 6,3157  | 170,22 | 60,925 | 231,15 | 26,2552 | -31,9907 | 390,9  | 33,0382 | 12,0813 |
| BA406_CW_BdTR11g | BdTR11g | 99,2126 | 355,56 | 28,0629 | 6,6034  | 154,58 | 58,075 | 212,65 | 27,246  | -32,1586 | 391,45 | 36,1167 | 10,867  |
| BA493_CW_BdTR11g | BdTR11g | 99,2126 | 355,56 | 28,0629 | 6,6034  | 154,58 | 58,075 | 212,65 | 27,246  | -32,1586 | 391,45 | 36,1167 | 10,867  |
| BA042_HW_BdTR11i | BdTR11i | 99,1827 | 340,06 | 27,1923 | 7,462   | 187,9  | 68,55  | 256,45 | 26,5132 | -31,4161 | 392,72 | 31,2194 | 12,9344 |
| BA377_CW_BdTR11i | BdTR11i | 98,712  | 364,69 | 26,6228 | 7,9247  | 133,58 | 51,275 | 184,85 | 27,554  | -32,162  | 380,52 | 38,5626 | 9,9428  |
| BA526_CW_BdTR11i | BdTR11i | 98,712  | 364,69 | 26,6228 | 7,9247  | 133,58 | 51,275 | 184,85 | 27,554  | -32,162  | 380,52 | 38,5626 | 9,9428  |
| BA022_HW_BdTR13a | BdTR13a | 98,952  | 312,12 | 29,7385 | 9,0134  | 132,82 | 50,4   | 183,23 | 27,7306 | -32,1181 | 385,73 | 36,5552 | 10,5869 |
| BA174_HW_BdTR13a | BdTR13a | 98,952  | 312,12 | 29,7385 | 9,0134  | 132,82 | 50,4   | 183,23 | 27,7306 | -32,1181 | 385,73 | 36,5552 | 10,5869 |
| BA371_CW_BdTR13a | BdTR13a | 99,2984 | 358,92 | 26,589  | 6,1106  | 127,58 | 47,95  | 175,53 | 27,1558 | -32,0346 | 401,71 | 39,5929 | 10,1458 |
| BA405_CW_BdTR13a | BdTR13a | 99,2984 | 358,92 | 26,589  | 6,1106  | 127,58 | 47,95  | 175,53 | 27,1558 | -32,0346 | 401,71 | 39,5929 | 10,1458 |
| BA070_HW_BdTR1i  | BdTR1i  | 98,5431 | 310,66 | 24,9114 | 10,1893 | 147,75 | 54,4   | 202,15 | 25,0125 | -30,7296 | 396,33 | 33,834  | 11,7319 |
| BA155_HW_BdTR1i  | BdTR1i  | 98,5431 | 310,66 | 24,9114 | 10,1893 | 147,75 | 54,4   | 202,15 | 25,0125 | -30,7296 | 396,33 | 33,834  | 11,7319 |
| BA469_CW_BdTR1i  | BdTR1i  | 98,4507 | 310,13 | 26,3632 | 12,4554 | 196,35 | 77,3   | 273,65 | 28,3002 | -31,4978 | 383,39 | 37,4971 | 10,2676 |
| BA486_CW_BdTR1i  | BdTR1i  | 98,4507 | 310,13 | 26,3632 | 12,4554 | 196,35 | 77,3   | 273,65 | 28,3002 | -31,4978 | 383,39 | 37,4971 | 10,2676 |
| BA378_CW_BdTR2b  | BdTR2b  | 99,1642 | 334,79 | 25,5897 | 9,0804  | 184,43 | 74,325 | 258,75 | 28,4258 | -31,974  | 396,22 | 40,6959 | 9,8107  |
| BA503_CW_BdTR2b  | BdTR2b  | 99,1642 | 334,79 | 25,5897 | 9,0804  | 184,43 | 74,325 | 258,75 | 28,4258 | -31,974  | 396,22 | 40,6959 | 9,8107  |
| BA107_HW_BdTR2g  | BdTR2g  | 98,915  | 322,42 | 25,504  | 9,6107  | 205,55 | 75,675 | 281,23 | 26,9508 | -30,797  | 390,86 | 29,8763 | 13,2668 |
| BA167_HW_BdTR2g  | BdTR2g  | 98,915  | 322,42 | 25,504  | 9,6107  | 205,55 | 75,675 | 281,23 | 26,9508 | -30,797  | 390,86 | 29,8763 | 13,2668 |

|                 |        |         |        |         |         |        |        |        |         |          |        |         |         |
|-----------------|--------|---------|--------|---------|---------|--------|--------|--------|---------|----------|--------|---------|---------|
| BA445_CW_BdTR2g | BdTR2g | 99,141  | 321,23 | 26,0647 | 11,9884 | 98,575 | 36,125 | 134,7  | 27,1502 | -31,3031 | 394,67 | 36,8124 | 10,8874 |
| BA527_CW_BdTR2g | BdTR2g | 99,141  | 321,23 | 26,0647 | 11,9884 | 98,575 | 36,125 | 134,7  | 27,1502 | -31,3031 | 394,67 | 36,8124 | 10,8874 |
| BA071_HW_BdTR3c | BdTR3c | 99,8607 | 313,18 | 26,5389 | 11,8327 | 173,03 | 64,825 | 237,85 | 27,34   | -32,1045 | 391,97 | 32,472  | 12,0845 |
| BA362_CW_BdTR3c | BdTR3c | 99,8703 | 346,56 | 24,0444 | 6,7756  | 175,03 | 51,075 | 226,1  | 22,5456 | -31,5366 | 393,11 | 34,2062 | 11,5274 |
| BA427_CW_BdTR3c | BdTR3c | 99,8703 | 346,56 | 24,0444 | 6,7756  | 175,03 | 51,075 | 226,1  | 22,5456 | -31,5366 | 393,11 | 34,2062 | 11,5274 |
| BA160_HW_BdTR5i | BdTR5i | 99,7791 | 320,7  | 25,8099 | 6,1914  | 134,38 | 55,975 | 190,35 | 27,948  | -32,0524 | 385,3  | 36,6785 | 10,646  |
| BA372_CW_BdTR5i | BdTR5i | 98,1287 | 326,87 | 27,244  | 10,9901 | 144,7  | 68,275 | 212,98 | 31,5617 | -31,8874 | 392,29 | 38,8932 | 10,1175 |
| BA464_CW_BdTR5i | BdTR5i | 98,1287 | 326,87 | 27,244  | 10,9901 | 144,7  | 68,275 | 212,98 | 31,5617 | -31,8874 | 392,29 | 38,8932 | 10,1175 |
| BA125_HW_BdTR9k | BdTR9k | 99,7491 | 303,76 | 28,6036 | 17,2965 | 142,33 | 40,2   | 182,53 | 22,0741 | -31,5799 | 391,38 | 36,5103 | 10,7677 |
| BA383_CW_BdTR9k | BdTR9k | 98,5867 | 321,85 | 27,9127 | 13,0488 | 156,5  | 56,85  | 213,35 | 26,5012 | -31,8205 | 382,92 | 39,3275 | 9,7471  |
| BA515_CW_BdTR9k | BdTR9k | 98,5867 | 321,85 | 27,9127 | 13,0488 | 156,5  | 56,85  | 213,35 | 26,5012 | -31,8205 | 382,92 | 39,3275 | 9,7471  |
| BA156_HW_Bis1   | Bis1   | 98,3617 | 327,15 | 23,8597 | 4,6496  | 117    | 38,625 | 155,63 | 26,3028 | -32,2874 | 390,43 | 37,3066 | 10,5286 |
| BA385_CW_Bis1   | Bis1   | 98,4401 | 329,93 | 26,5137 | 9,2391  | 111,93 | 43,575 | 155,5  | 28,3158 | -32,284  | 392,75 | 38,7511 | 10,1582 |
| BA390_CW_Bis1   | Bis1   | 98,4401 | 329,93 | 26,5137 | 9,2391  | 111,93 | 43,575 | 155,5  | 28,3158 | -32,284  | 392,75 | 38,7511 | 10,1582 |
| BA169_HW_Kah1   | Kah1   | 99,8647 | 295,11 | 32,0676 | 7,8515  | 124,48 | 39     | 163,48 | 23,3447 | -31,9871 | 395,11 | 38,6626 | 10,2481 |
| BA356_CW_Kah1   | Kah1   | 98,9119 | 354,35 | 26,2315 | 10,063  | 142,6  | 53,875 | 196,48 | 27,3753 | -31,6866 | 388,89 | 40,3501 | 9,6491  |
| BA420_CW_Kah1   | Kah1   | 98,9119 | 354,35 | 26,2315 | 10,063  | 142,6  | 53,875 | 196,48 | 27,3753 | -31,6866 | 388,89 | 40,3501 | 9,6491  |
| BA047_HW_Kah5   | Kah5   | 98,5779 | 328,12 | 27,4317 | 8,0542  | 156,68 | 46,025 | 202,7  | 22,9428 | -31,0487 | 391,78 | 36,9904 | 10,6068 |
| BA158_HW_Kah5   | Kah5   | 98,5779 | 328,12 | 27,4317 | 8,0542  | 156,68 | 46,025 | 202,7  | 22,9428 | -31,0487 | 391,78 | 36,9904 | 10,6068 |
| BA399_CW_Kah5   | Kah5   | 99,1395 | 358,79 | 25,6867 | 6,6676  | 166,13 | 54,575 | 220,7  | 24,1437 | -31,4011 | 394,39 | 37,4447 | 10,5928 |
| BA482_CW_Kah5   | Kah5   | 99,1395 | 358,79 | 25,6867 | 6,6676  | 166,13 | 54,575 | 220,7  | 24,1437 | -31,4011 | 394,39 | 37,4447 | 10,5928 |
| BA157_HW_Koz1   | Koz1   | 100,34  | 346,18 | 24,6393 | 5,522   | 111,05 | 37,025 | 148,08 | 24,9715 | -31,3085 | 399,44 | 37,1463 | 10,8321 |
| BA501_CW_Koz1   | Koz1   | 99,1951 | 330,62 | 27,2562 | 8,2662  | 148,05 | 51,025 | 199,08 | 25,7406 | -31,9008 | 396,07 | 36,3917 | 10,9175 |
| BA511_CW_Koz1   | Koz1   | 99,1951 | 330,62 | 27,2562 | 8,2662  | 148,05 | 51,025 | 199,08 | 25,7406 | -31,9008 | 396,07 | 36,3917 | 10,9175 |
| BA057_HW_Koz3   | Koz3   | 100,34  | 346,18 | 24,6393 | 5,522   | 111,05 | 37,025 | 148,08 | 24,9715 | -31,3085 | 399,44 | 37,1463 | 10,8321 |
| BA074_HW_Koz3   | Koz3   | 99,2253 | 381,63 | 21,3916 | 3,8404  | 163,05 | 57,1   | 220,15 | 26,1094 | -31,6468 | 394,63 | 34,0051 | 11,7823 |
| BA411_CW_Koz3   | Koz3   | 99,4638 | 369,31 | 23,8853 | 6,3061  | 197,3  | 66,325 | 263,62 | 24,9763 | -32,1301 | 389,47 | 34,9537 | 11,1881 |
| BA484_CW_Koz3   | Koz3   | 99,4638 | 369,31 | 23,8853 | 6,3061  | 197,3  | 66,325 | 263,62 | 24,9763 | -32,1301 | 389,47 | 34,9537 | 11,1881 |



|               |      |           |           |           |          |           |           |           |           |           |           |           |           |
|---------------|------|-----------|-----------|-----------|----------|-----------|-----------|-----------|-----------|-----------|-----------|-----------|-----------|
| BA026_HW_Ron2 | Ron2 | 99,478618 | 362,4171  | 24,399536 | 7,125719 | 137,53043 | 65,785677 | 202,9648  | 31,672994 | -31,23899 | 397,85106 | 38,796531 | 10,323291 |
| BA151_HW_Ron2 | Ron2 | 99,478618 | 362,4171  | 24,399536 | 7,125719 | 137,53043 | 65,785677 | 202,9648  | 31,672994 | -31,23899 | 397,85106 | 38,796531 | 10,323291 |
| BA409_CW_Ron2 | Ron2 | 99,540782 | 374,22254 | 24,769726 | 9,395806 | 125,2623  | 55,360467 | 181,36405 | 30,77086  | -31,47118 | 392,49618 | 41,641172 | 9,437255  |
| BA431_CW_Ron2 | Ron2 | 99,540782 | 374,22254 | 24,769726 | 9,395806 | 125,2623  | 55,360467 | 181,36405 | 30,77086  | -31,47118 | 392,49618 | 41,641172 | 9,437255  |

## Drought:

|               | ecotype | leaf_rwc | leaf_wc | lma     | pro     | abvrgd | blwgrd | ttlmass | rmr     | delta13c | leafc  | leafn   | cn      |
|---------------|---------|----------|---------|---------|---------|--------|--------|---------|---------|----------|--------|---------|---------|
| BA030_HD_ABR2 | ABR2    | 95,5672  | 275,21  | 32,1891 | 40,0867 | 88,4   | 64,925 | 153,32  | 41,368  | -30,9942 | 402,01 | 35,3526 | 11,415  |
| BA101_HD_ABR2 | ABR2    | 95,5672  | 275,21  | 32,1891 | 40,0867 | 88,4   | 64,925 | 153,32  | 41,368  | -30,9942 | 402,01 | 35,3526 | 11,415  |
| BA366_CD_ABR2 | ABR2    | 96,27    | 275,61  | 29,9968 | 38,994  | 76,375 | 44,475 | 120,85  | 36,4106 | -31,0081 | 392,34 | 34,9823 | 11,23   |
| BA439_CD_ABR2 | ABR2    | 96,27    | 275,61  | 29,9968 | 38,994  | 76,375 | 44,475 | 120,85  | 36,4106 | -31,0081 | 392,34 | 34,9823 | 11,23   |
| BA006_HD_ABR3 | ABR3    | 94,1465  | 296,47  | 26,5479 | 20,5059 | 101,18 | 62,475 | 163,65  | 38,0076 | -30,9528 | 400,56 | 32,8802 | 12,1867 |
| BA103_HD_ABR3 | ABR3    | 94,1465  | 296,47  | 26,5479 | 20,5059 | 101,18 | 62,475 | 163,65  | 38,0076 | -30,9528 | 400,56 | 32,8802 | 12,1867 |
| BA418_CD_ABR3 | ABR3    | 97,6832  | 354,52  | 23,1046 | 16,4585 | 87,375 | 52,4   | 139,78  | 37,0066 | -30,3755 | 401,97 | 34,0628 | 11,8359 |
| BA465_CD_ABR3 | ABR3    | 97,6832  | 354,52  | 23,1046 | 16,4585 | 87,375 | 52,4   | 139,78  | 37,0066 | -30,3755 | 401,97 | 34,0628 | 11,8359 |
| BA038_HD_ABR4 | ABR4    | 95,6684  | 299,6   | 30,4712 | 17,7323 | 59,125 | 33,625 | 92,75   | 36,419  | -30,9893 | 406,96 | 34,8378 | 11,7046 |
| BA170_HD_ABR4 | ABR4    | 95,6684  | 299,6   | 30,4712 | 17,7323 | 59,125 | 33,625 | 92,75   | 36,419  | -30,9893 | 406,96 | 34,8378 | 11,7046 |
| BA368_CD_ABR4 | ABR4    | 97,5747  | 326,08  | 27,4177 | 13,1446 | 48,725 | 30,75  | 79,475  | 39,3827 | -30,98   | 397,56 | 36,1803 | 11,0352 |
| BA521_CD_ABR4 | ABR4    | 97,5747  | 326,08  | 27,4177 | 13,1446 | 48,725 | 30,75  | 79,475  | 39,3827 | -30,98   | 397,56 | 36,1803 | 11,0352 |
| BA024_HD_ABR5 | ABR5    | 93,9699  | 301,28  | 28,602  | 15,5567 | 88,5   | 59,475 | 147,97  | 39,6646 | -31,2665 | 403,55 | 37,5765 | 10,8271 |
| BA104_HD_ABR5 | ABR5    | 93,9699  | 301,28  | 28,602  | 15,5567 | 88,5   | 59,475 | 147,97  | 39,6646 | -31,2665 | 403,55 | 37,5765 | 10,8271 |
| BA454_CD_ABR5 | ABR5    | 97,8872  | 326,65  | 25,3111 | 7,2641  | 72,297 | 46,4   | 118,49  | 39,1138 | -31,0825 | 386,6  | 35,9327 | 10,7333 |
| BA522_CD_ABR5 | ABR5    | 97,8872  | 326,65  | 25,3111 | 7,2641  | 72,297 | 46,4   | 118,49  | 39,1138 | -31,0825 | 386,6  | 35,9327 | 10,7333 |
| BA037_HD_ABR6 | ABR6    | 94,3688  | 291,38  | 28,1391 | 31,3657 | 81,25  | 41,45  | 122,7   | 33,747  | -31,3617 | 401,51 | 35,7275 | 11,2734 |
| BA099_HD_ABR6 | ABR6    | 94,3688  | 291,38  | 28,1391 | 31,3657 | 81,25  | 41,45  | 122,7   | 33,747  | -31,3617 | 401,51 | 35,7275 | 11,2734 |
| BA416_CD_ABR6 | ABR6    | 95,7619  | 309,23  | 27,7202 | 17,3763 | 64,675 | 39,5   | 104,18  | 37,3018 | -31,2286 | 407,43 | 33,2924 | 12,275  |
| BA523_CD_ABR6 | ABR6    | 95,7619  | 309,23  | 27,7202 | 17,3763 | 64,675 | 39,5   | 104,18  | 37,3018 | -31,2286 | 407,43 | 33,2924 | 12,275  |

|                 |        |         |        |         |         |        |         |        |         |          |        |         |         |
|-----------------|--------|---------|--------|---------|---------|--------|---------|--------|---------|----------|--------|---------|---------|
| BA100_HD_ABR8   | ABR8   | 92,1823 | 307,46 | 32,7175 | 37,0386 | 129,1  | 33,25   | 162,35 | 20,5232 | -31,3316 | 392,46 | 32,4176 | 12,2406 |
| BA143_HD_ABR8   | ABR8   | 92,1823 | 307,46 | 32,7175 | 37,0386 | 129,1  | 33,25   | 162,35 | 20,5232 | -31,3316 | 392,46 | 32,4176 | 12,2406 |
| BA415_CD_ABR8   | ABR8   | 95,8411 | 348,43 | 29,1515 | 13,8568 | 95,75  | 33,2    | 128,95 | 26,3473 | -31,325  | 393,59 | 31,1215 | 12,7443 |
| BA506_CD_ABR8   | ABR8   | 95,8411 | 348,43 | 29,1515 | 13,8568 | 95,75  | 33,2    | 128,95 | 26,3473 | -31,325  | 393,59 | 31,1215 | 12,7443 |
| BA049_HD_Adi10  | Adi10  | 91,5314 | 335,69 | 28,3401 | 83,7468 | 138,23 | 60,8    | 199,02 | 30,4882 | -30,8597 | 396,7  | 31,5821 | 12,5705 |
| BA052_HD_Adi10  | Adi10  | 91,5314 | 335,69 | 28,3401 | 83,7468 | 138,23 | 60,8    | 199,02 | 30,4882 | -30,8597 | 396,7  | 31,5821 | 12,5705 |
| BA478_CD_Adi10  | Adi10  | 93,4741 | 330,73 | 29,3769 | 25,8306 | 129,5  | 74,5    | 204    | 36,3975 | -30,8103 | 398,07 | 31,8895 | 12,499  |
| BA513_CD_Adi10  | Adi10  | 93,4741 | 330,73 | 29,3769 | 25,8306 | 129,5  | 74,5    | 204    | 36,3975 | -30,8103 | 398,07 | 31,8895 | 12,499  |
| BA036_HD_Adi12  | Adi12  | 92,6729 | 290,48 | 29,3319 | 37,4857 | 158,68 | 75,7    | 234,37 | 32,3829 | -30,3287 | 399,63 | 32,1182 | 12,5141 |
| BA140_HD_Adi12  | Adi12  | 92,6729 | 290,48 | 29,3319 | 37,4857 | 158,68 | 75,7    | 234,37 | 32,3829 | -30,3287 | 399,63 | 32,1182 | 12,5141 |
| BA455_CD_Adi12  | Adi12  | 91,5266 | 291,54 | 29,3439 | 22,6328 | 124,07 | 65,375  | 189,45 | 34,5262 | -30,3494 | 401,56 | 32,3216 | 12,4274 |
| BA525_CD_Adi12  | Adi12  | 91,5266 | 291,54 | 29,3439 | 22,6328 | 124,07 | 65,375  | 189,45 | 34,5262 | -30,3494 | 401,56 | 32,3216 | 12,4274 |
| BA050_HD_Adi2   | Adi2   | 94,7074 | 280,35 | 29,122  | 44,1721 | 106,6  | 50,6    | 157,2  | 32,0808 | -30,4593 | 397,18 | 30,3205 | 13,1419 |
| BA094_HD_Adi2   | Adi2   | 94,7074 | 280,35 | 29,122  | 44,1721 | 106,6  | 50,6    | 157,2  | 32,0808 | -30,4593 | 397,18 | 30,3205 | 13,1419 |
| BA500_CD_Adi2   | Adi2   | 95,5478 | 286,92 | 28,7405 | 33,3583 | 95,05  | 64,975  | 160,03 | 40,5204 | -30,9863 | 394,32 | 32,8584 | 12,1132 |
| BA509_CD_Adi2   | Adi2   | 95,5478 | 286,92 | 28,7405 | 33,3583 | 95,05  | 64,975  | 160,03 | 40,5204 | -30,9863 | 394,32 | 32,8584 | 12,1132 |
| BA025_HD_Bd1.1  | Bd1.1  | 96,6513 | 318,06 | 27,8895 | 22,4793 | 69,95  | 32,675  | 102,62 | 32,6184 | -30,7095 | 396,41 | 32,6329 | 12,2739 |
| BA051_HD_Bd1.1  | Bd1.1  | 96,6513 | 318,06 | 27,8895 | 22,4793 | 69,95  | 32,675  | 102,62 | 32,6184 | -30,7095 | 396,41 | 32,6329 | 12,2739 |
| BA442_CD_Bd1.1  | Bd1.1  | 97,5714 | 338,57 | 26,4631 | 9,8706  | 72,9   | 34,675  | 107,58 | 31,9464 | -30,8879 | 396,28 | 29,2359 | 13,6961 |
| BA475_CD_Bd1.1  | Bd1.1  | 97,5714 | 338,57 | 26,4631 | 9,8706  | 72,9   | 34,675  | 107,58 | 31,9464 | -30,8879 | 396,28 | 29,2359 | 13,6961 |
| BA093_HD_Bd18.1 | Bd18.1 | 89,0917 | 287,91 | 32,5382 | 40,6435 | 132,28 | 54,4    | 186,67 | 29,1314 | -30,5819 | 405,25 | 33,6488 | 12,0622 |
| BA453_CD_Bd18.1 | Bd18.1 | 95,8214 | 323,02 | 25,8254 | 12,4704 | 122,7  | 66,6    | 189,51 | 34,814  | -30,5654 | 410,32 | 32,0128 | 12,8275 |
| BA023_HD_Bd2.3  | Bd2.3  | 92,9477 | 290,3  | 30,6912 | 32,8335 | 115,75 | 55,225  | 170,97 | 32,1404 | -30,4738 | 397    | 29,9625 | 13,2597 |
| BA088_HD_Bd2.3  | Bd2.3  | 92,9477 | 290,3  | 30,6912 | 32,8335 | 115,75 | 55,225  | 170,97 | 32,1404 | -30,4738 | 397    | 29,9625 | 13,2597 |
| BA353_CD_Bd2.3  | Bd2.3  | 96,4096 | 313,1  | 27,9172 | 16,2772 | 103,6  | 49,8667 | 153,26 | 32,3381 | -30,9876 | 391,61 | 32,8971 | 11,9916 |
| BA494_CD_Bd2.3  | Bd2.3  | 96,4096 | 313,1  | 27,9172 | 16,2772 | 103,6  | 49,8667 | 153,26 | 32,3381 | -30,9876 | 391,61 | 32,8971 | 11,9916 |
| BA056_HD_Bd21   | Bd21   | 92,1978 | 329,74 | 31,3491 | 19,6817 | 112,55 | 45,45   | 158    | 28,7482 | -30,0903 | 404,42 | 32,2814 | 12,6108 |
| BA163_HD_Bd21   | Bd21   | 92,1978 | 329,74 | 31,3491 | 19,6817 | 112,55 | 45,45   | 158    | 28,7482 | -30,0903 | 404,42 | 32,2814 | 12,6108 |

|                  |         |         |        |         |         |        |        |        |         |          |        |         |         |
|------------------|---------|---------|--------|---------|---------|--------|--------|--------|---------|----------|--------|---------|---------|
| BA459_CD_Bd21    | Bd21    | 97,234  | 367,57 | 28,5431 | 14,0697 | 96,7   | 52,45  | 149,15 | 35,0758 | -30,3526 | 403,03 | 32,3337 | 12,5448 |
| BA499_CD_Bd21    | Bd21    | 97,234  | 367,57 | 28,5431 | 14,0697 | 96,7   | 52,45  | 149,15 | 35,0758 | -30,3526 | 403,03 | 32,3337 | 12,5448 |
| BA097_HD_Bd21.3  | Bd21.3  | 86,9049 | 295,54 | 35,8918 | 58,7702 | 131,23 | 79,325 | 210,55 | 35,7497 | -31,192  | 394,95 | 34,5557 | 11,4413 |
| BA111_HD_Bd21.3  | Bd21.3  | 86,9049 | 295,54 | 35,8918 | 58,7702 | 131,23 | 79,325 | 210,55 | 35,7497 | -31,192  | 394,95 | 34,5557 | 11,4413 |
| BA430_CD_Bd21.3  | Bd21.3  | 90,9053 | 311,26 | 31,4101 | 20,4713 | 136,3  | 69,35  | 205,65 | 33,7667 | -30,7154 | 398,97 | 33,7282 | 11,8389 |
| BA512_CD_Bd21.3  | Bd21.3  | 90,9053 | 311,26 | 31,4101 | 20,4713 | 136,3  | 69,35  | 205,65 | 33,7667 | -30,7154 | 398,97 | 33,7282 | 11,8389 |
| BA166_HD_Bd3.1   | Bd3.1   | 90,2132 | 299,88 | 29,9041 | 29,8525 | 124,08 | 60,5   | 184,57 | 33,1324 | -30,6968 | 402,3  | 32,1438 | 12,552  |
| BA398_CD_Bd3.1   | Bd3.1   | 86,8178 | 321,96 | 30,5611 | 44,2785 | 158,58 | 66,425 | 225    | 29,9478 | -30,6395 | 391,02 | 28,8347 | 13,5893 |
| BA422_CD_Bd3.1   | Bd3.1   | 86,8178 | 321,96 | 30,5611 | 44,2785 | 158,58 | 66,425 | 225    | 29,9478 | -30,6395 | 391,02 | 28,8347 | 13,5893 |
| BA079_HD_Bd30.1  | Bd30.1  | 90,7217 | 272,28 | 32,0642 | 49,0163 | 128,28 | 60,325 | 188,6  | 32,1573 | -31,1346 | 387,86 | 34,6917 | 11,3551 |
| BA162_HD_Bd30.1  | Bd30.1  | 90,7217 | 272,28 | 32,0642 | 49,0163 | 128,28 | 60,325 | 188,6  | 32,1573 | -31,1346 | 387,86 | 34,6917 | 11,3551 |
| BA425_CD_Bd30.1  | Bd30.1  | 93,1622 | 309,6  | 27,8919 | 30,0273 | 88,65  | 51,325 | 139,98 | 36,8631 | -31,1783 | 385,03 | 35,2732 | 10,9211 |
| BA481_CD_Bd30.1  | Bd30.1  | 93,1622 | 309,6  | 27,8919 | 30,0273 | 88,65  | 51,325 | 139,98 | 36,8631 | -31,1783 | 385,03 | 35,2732 | 10,9211 |
| BA121_HD_BdTR10c | BdTR10c | 93,1128 | 277,44 | 29,1343 | 61,7782 | 131,55 | 52,475 | 184,02 | 28,5702 | -30,7721 | 403,39 | 29,1462 | 14,0575 |
| BA173_HD_BdTR10c | BdTR10c | 93,1128 | 277,44 | 29,1343 | 61,7782 | 131,55 | 52,475 | 184,02 | 28,5702 | -30,7721 | 403,39 | 29,1462 | 14,0575 |
| BA421_CD_BdTR10c | BdTR10c | 91,2539 | 307,27 | 27,9445 | 62,4874 | 114,12 | 57,2   | 171,33 | 33,5289 | -30,65   | 402,13 | 31,7225 | 12,7066 |
| BA440_CD_BdTR10c | BdTR10c | 91,2539 | 307,27 | 27,9445 | 62,4874 | 114,12 | 57,2   | 171,33 | 33,5289 | -30,65   | 402,13 | 31,7225 | 12,7066 |
| BA059_HD_BdTR11g | BdTR11g | 89,9507 | 294,07 | 31,8587 | 37,5698 | 120,03 | 60,225 | 180,25 | 33,1338 | -31,1966 | 402,96 | 31,3896 | 12,8764 |
| BA090_HD_BdTR11g | BdTR11g | 89,9507 | 294,07 | 31,8587 | 37,5698 | 120,03 | 60,225 | 180,25 | 33,1338 | -31,1966 | 402,96 | 31,3896 | 12,8764 |
| BA397_CD_BdTR11g | BdTR11g | 95,3823 | 312,72 | 28,7297 | 15,1499 | 116,6  | 57,7   | 174,3  | 33,1039 | -31,4914 | 400,42 | 34,3049 | 11,7522 |
| BA510_CD_BdTR11g | BdTR11g | 95,3823 | 312,72 | 28,7297 | 15,1499 | 116,6  | 57,7   | 174,3  | 33,1039 | -31,4914 | 400,42 | 34,3049 | 11,7522 |
| BA102_HD_BdTR11i | BdTR11i | 89,3787 | 295,88 | 32,3145 | 63,7474 | 126,55 | 57,3   | 183,85 | 31,4774 | -31,1197 | 399,71 | 30,9229 | 12,9344 |
| BA128_HD_BdTR11i | BdTR11i | 89,3787 | 295,88 | 32,3145 | 63,7474 | 126,55 | 57,3   | 183,85 | 31,4774 | -31,1197 | 399,71 | 30,9229 | 12,9344 |
| BA408_CD_BdTR11i | BdTR11i | 94,9355 | 306,93 | 30,6664 | 24,7061 | 121,07 | 52,35  | 173,43 | 30,7026 | -31,104  | 399,6  | 33,201  | 12,1142 |
| BA450_CD_BdTR11i | BdTR11i | 94,9355 | 306,93 | 30,6664 | 24,7061 | 121,07 | 52,35  | 173,43 | 30,7026 | -31,104  | 399,6  | 33,201  | 12,1142 |
| BA361_CD_BdTR12c | BdTR12c | 95,5726 | 328,56 | 25,4422 | 24,1003 | 105,52 | 53,1   | 158,63 | 33,6257 | -31,4268 | 396,58 | 33,3719 | 11,8987 |
| BA061_HD_BdTR13a | BdTR13a | 92,1344 | 297,05 | 30,5101 | 27,5649 | 104,93 | 44,75  | 149,67 | 30,0713 | -31,4933 | 394,35 | 35,1597 | 11,2545 |
| BA394_CD_BdTR13a | BdTR13a | 94,9504 | 299,69 | 29,8083 | 16,802  | 99,975 | 54     | 153,98 | 34,9891 | -31,1377 | 402,13 | 33,0339 | 12,2083 |

|                  |         |         |        |         |         |        |         |        |         |          |        |         |         |
|------------------|---------|---------|--------|---------|---------|--------|---------|--------|---------|----------|--------|---------|---------|
| BA460_CD_BdTR13a | BdTR13a | 94,9504 | 299,69 | 29,8083 | 16,802  | 99,975 | 54      | 153,98 | 34,9891 | -31,1377 | 402,13 | 33,0339 | 12,2083 |
| BA108_HD_BdTR1i  | BdTR1i  | 90,9792 | 285,17 | 28,2368 | 54,0095 | 128,2  | 55,85   | 184,05 | 29,9311 | -30,355  | 401,84 | 30,8815 | 13,0362 |
| BA134_HD_BdTR1i  | BdTR1i  | 90,9792 | 285,17 | 28,2368 | 54,0095 | 128,2  | 55,85   | 184,05 | 29,9311 | -30,355  | 401,84 | 30,8815 | 13,0362 |
| BA457_CD_BdTR1i  | BdTR1i  | 92,2691 | 298,73 | 27,4487 | 30,9165 | 137,37 | 79,3    | 216,68 | 36,5266 | -30,3089 | 401,02 | 31,1322 | 12,9409 |
| BA480_CD_BdTR1i  | BdTR1i  | 92,2691 | 298,73 | 27,4487 | 30,9165 | 137,37 | 79,3    | 216,68 | 36,5266 | -30,3089 | 401,02 | 31,1322 | 12,9409 |
| BA003_HD_BdTR2b  | BdTR2b  | 88,3067 | 275,41 | 30,6612 | 46,3035 | 142,63 | 62,4602 | 205,23 | 30,4213 | -30,4491 | 401,48 | 32,0488 | 12,6043 |
| BA091_HD_BdTR2b  | BdTR2b  | 88,3067 | 275,41 | 30,6612 | 46,3035 | 142,63 | 62,4602 | 205,23 | 30,4213 | -30,4491 | 401,48 | 32,0488 | 12,6043 |
| BA389_CD_BdTR2b  | BdTR2b  | 92,8529 | 297,14 | 29,4203 | 18,8064 | 128,22 | 76,15   | 204,38 | 36,9819 | -30,4727 | 403,21 | 33,3256 | 12,1192 |
| BA472_CD_BdTR2b  | BdTR2b  | 92,8529 | 297,14 | 29,4203 | 18,8064 | 128,22 | 76,15   | 204,38 | 36,9819 | -30,4727 | 403,21 | 33,3256 | 12,1192 |
| BA124_HD_BdTR2g  | BdTR2g  | 83,6304 | 255,64 | 30,6727 | 80,7185 | 141,48 | 74,775  | 216,25 | 34,4993 | -30,5584 | 388,58 | 30,9619 | 12,6063 |
| BA165_HD_BdTR2g  | BdTR2g  | 83,6304 | 255,64 | 30,6727 | 80,7185 | 141,48 | 74,775  | 216,25 | 34,4993 | -30,5584 | 388,58 | 30,9619 | 12,6063 |
| BA364_CD_BdTR2g  | BdTR2g  | 92,8345 | 295,51 | 29,707  | 28,9141 | 140,7  | 82,275  | 222,98 | 36,2953 | -30,2991 | 406,68 | 32,9221 | 12,4293 |
| BA369_CD_BdTR2g  | BdTR2g  | 92,8345 | 295,51 | 29,707  | 28,9141 | 140,7  | 82,275  | 222,98 | 36,2953 | -30,2991 | 406,68 | 32,9221 | 12,4293 |
| BA073_HD_BdTR3c  | BdTR3c  | 87,8504 | 267,87 | 30,6517 | 44,774  | 103,1  | 53,15   | 156,25 | 34,0107 | -30,8192 | 409,45 | 28,5468 | 14,4109 |
| BA172_HD_BdTR3c  | BdTR3c  | 87,8504 | 267,87 | 30,6517 | 44,774  | 103,1  | 53,15   | 156,25 | 34,0107 | -30,8192 | 409,45 | 28,5468 | 14,4109 |
| BA370_CD_BdTR3c  | BdTR3c  | 94,1643 | 307,36 | 27,969  | 14,2319 | 109,42 | 63,775  | 173,2  | 36,8347 | -30,8598 | 398,76 | 29,8799 | 13,3589 |
| BA424_CD_BdTR3c  | BdTR3c  | 94,1643 | 307,36 | 27,969  | 14,2319 | 109,42 | 63,775  | 173,2  | 36,8347 | -30,8598 | 398,76 | 29,8799 | 13,3589 |
| BA065_HD_BdTR5i  | BdTR5i  | 91,8255 | 282,44 | 32,7004 | 53,7029 | 100,55 | 65,95   | 166,5  | 38,6272 | -31,1833 | 399,66 | 33,8388 | 11,906  |
| BA082_HD_BdTR5i  | BdTR5i  | 91,8255 | 282,44 | 32,7004 | 53,7029 | 100,55 | 65,95   | 166,5  | 38,6272 | -31,1833 | 399,66 | 33,8388 | 11,906  |
| BA470_CD_BdTR5i  | BdTR5i  | 94,8835 | 312    | 29,218  | 19,9079 | 90,6   | 55,7    | 146,3  | 37,1162 | -30,8629 | 401,42 | 32,836  | 12,3188 |
| BA473_CD_BdTR5i  | BdTR5i  | 94,8835 | 312    | 29,218  | 19,9079 | 90,6   | 55,7    | 146,3  | 37,1162 | -30,8629 | 401,42 | 32,836  | 12,3188 |
| BA002_HD_BdTR9k  | BdTR9k  | 95,6189 | 297,03 | 28,4399 | 17,6973 | 143,73 | 65,025  | 208,75 | 32,7704 | -30,5734 | 409,21 | 32,5471 | 12,7073 |
| BA033_HD_BdTR9k  | BdTR9k  | 95,6189 | 297,03 | 28,4399 | 17,6973 | 143,73 | 65,025  | 208,75 | 32,7704 | -30,5734 | 409,21 | 32,5471 | 12,7073 |
| BA363_CD_BdTR9k  | BdTR9k  | 94,807  | 309,37 | 26,8249 | 21,5214 | 122,8  | 51,775  | 174,58 | 29,77   | -30,9229 | 401,68 | 33,5643 | 12,0002 |
| BA410_CD_BdTR9k  | BdTR9k  | 94,807  | 309,37 | 26,8249 | 21,5214 | 122,8  | 51,775  | 174,58 | 29,77   | -30,9229 | 401,68 | 33,5643 | 12,0002 |
| BA110_HD_Bis1    | Bis1    | 91,5204 | 276,88 | 34,1313 | 34,8535 | 117,17 | 54,9398 | 171,97 | 32,1238 | -31,0275 | 399,55 | 32,1223 | 12,4379 |
| BA373_CD_Bis1    | Bis1    | 94,8878 | 312,91 | 26,9505 | 14,4399 | 87,15  | 41,475  | 128,63 | 33,8045 | -31,4936 | 401,23 | 33,1728 | 12,1146 |
| BA519_CD_Bis1    | Bis1    | 94,8878 | 312,91 | 26,9505 | 14,4399 | 87,15  | 41,475  | 128,63 | 33,8045 | -31,4936 | 401,23 | 33,1728 | 12,1146 |

|                |       |           |           |           |           |          |           |           |         |           |           |           |           |
|----------------|-------|-----------|-----------|-----------|-----------|----------|-----------|-----------|---------|-----------|-----------|-----------|-----------|
| BA046_HD_Kah1  | Kah1  | 93,0147   | 310,34    | 29,7299   | 39,7369   | 110,85   | 55,575    | 166,42    | 33,7495 | -30,7397  | 402,08    | 30,9699   | 13,0816   |
| BA168_HD_Kah1  | Kah1  | 93,0147   | 310,34    | 29,7299   | 39,7369   | 110,85   | 55,575    | 166,42    | 33,7495 | -30,7397  | 402,08    | 30,9699   | 13,0816   |
| BA382_CD_Kah1  | Kah1  | 95,019    | 320,6     | 28,6329   | 22,407    | 107,22   | 55,45     | 162,68    | 33,7389 | -31,0315  | 403,87    | 31,9183   | 12,7028   |
| BA495_CD_Kah1  | Kah1  | 95,019    | 320,6     | 28,6329   | 22,407    | 107,22   | 55,45     | 162,68    | 33,7389 | -31,0315  | 403,87    | 31,9183   | 12,7028   |
| BA048_HD_Kah5  | Kah5  | 91,6097   | 292,11    | 29,2052   | 46,3743   | 122,93   | 48,325    | 171,25    | 28,4994 | -30,3344  | 404,2     | 31,2071   | 12,9653   |
| BA095_HD_Kah5  | Kah5  | 91,6097   | 292,11    | 29,2052   | 46,3743   | 122,93   | 48,325    | 171,25    | 28,4994 | -30,3344  | 404,2     | 31,2071   | 12,9653   |
| BA401_CD_Kah5  | Kah5  | 94,604    | 331,21    | 26,7106   | 20,6909   | 121,47   | 48,75     | 170,23    | 28,6406 | -30,663   | 402,6     | 33,2662   | 12,1173   |
| BA489_CD_Kah5  | Kah5  | 94,604    | 331,21    | 26,7106   | 20,6909   | 121,47   | 48,75     | 170,23    | 28,6406 | -30,663   | 402,6     | 33,2662   | 12,1173   |
| BA089_HD_Koz.3 | Koz.3 | 82,1711   | 293,25    | 34,5124   | 67,5646   | 103,62   | 43,625    | 147,25    | 29,6711 | -30,9751  | 406,79    | 29,9398   | 13,6053   |
| BA395_CD_Koz1  | Koz1  | 95,9543   | 332,48    | 26,6403   | 16,1547   | 82,2     | 56,775    | 138,98    | 40,0757 | -31,2827  | 404,89    | 32,4497   | 12,5778   |
| BA507_CD_Koz1  | Koz1  | 95,9543   | 332,48    | 26,6403   | 16,1547   | 82,2     | 56,775    | 138,98    | 40,0757 | -31,2827  | 404,89    | 32,4497   | 12,5778   |
| BA081_HD_Koz3  | Koz3  | 82,1711   | 293,25    | 34,5124   | 67,5646   | 103,62   | 43,625    | 147,25    | 29,6711 | -30,9751  | 406,79    | 29,9398   | 13,6053   |
| BA388_CD_Koz3  | Koz3  | 88,6229   | 328       | 25,7217   | 20,9671   | 141,17   | 80,425    | 221,6     | 36,4373 | -30,5143  | 403,35    | 31,5167   | 12,7978   |
| BA467_CD_Koz3  | Koz3  | 88,6229   | 328       | 25,7217   | 20,9671   | 141,17   | 80,425    | 221,6     | 36,4373 | -30,5143  | 403,35    | 31,5167   | 12,7978   |
| BA035_HD_Ron2  | Ron2  | 92,82645  | 327,96356 | 28,296603 | 46,865344 | 97,16903 | 67,562792 | 164,90518 | 38,5043 | -30,60872 | 404,18678 | 34,5693   | 12,098827 |
| BA379_D_Ron2   | Ron2  | 95,496932 | 339,58655 | 26,694638 | 22,464309 | 91,12377 | 61,060894 | 153,78871 | 39,112  | -30,60334 | 404,29112 | 35,929524 | 11,507316 |
| BA432_D_Ron2   | Ron2  | 95,496932 | 339,58655 | 26,694638 | 22,464309 | 91,12377 | 61,060894 | 153,78871 | 39,112  | -30,60334 | 404,29112 | 35,929524 | 11,507316 |
